# Supplementary material for: Rapid ethnographic assessment of the COVID-19 pandemic April 2020 ‘surge’ and its impact on service delivery in an Acute Care Medical Emergency Department and Trauma Center
Source: PubMed Central journal article supplement — BMJ Open. 2020 Oct 20;10(10):e041772. doi: 10.1136/bmjopen-2020-041772 (PMC7577068; doi:10.1136/bmjopen-2020-041772), 2020-10-20
Supplement: bmjopen-2020-041772.draft_revisions.pdf [file bmjopen-2020-041772.draft_revisions.pdf]

# BMJ Open

BMJ Open is committed to open peer review. As part of this commitment we make the peer review history of every article we publish publicly available.

When an article is published we post the peer reviewers' comments and the authors' responses online. We also post the versions of the paper that were used during peer review. These are the versions that the peer review comments apply to.

The versions of the paper that follow are the versions that were submitted during the peer review process. They are not the versions of record or the final published versions. They should not be cited or distributed as the published version of this manuscript.

BMJ Open is an open access journal and the full, final, typeset and author-corrected version of record of the manuscript is available on our site with no access controls, subscription charges or pay-per-view fees (<http://bmjopen.bmj.com>).

If you have any questions on BMJ Open's open peer review process please email [info.bmjopen@bmj.com](mailto:info.bmjopen@bmj.com)

# BMJ Open

## A Rapid Ethnographic Assessment of the COVID-19 Pandemic April 2020 "Surge" and its Impact on Service Delivery in an Acute Care Medical Emergency Department and Trauma Center

|                               |                                                                                                                                                                                                                                                                                                                                                                                                                                                                                                                                                                                                                                                                               |
|-------------------------------|-------------------------------------------------------------------------------------------------------------------------------------------------------------------------------------------------------------------------------------------------------------------------------------------------------------------------------------------------------------------------------------------------------------------------------------------------------------------------------------------------------------------------------------------------------------------------------------------------------------------------------------------------------------------------------|
| Journal:                      | <i>BMJ Open</i>                                                                                                                                                                                                                                                                                                                                                                                                                                                                                                                                                                                                                                                               |
| Manuscript ID                 | bmjopen-2020-041772                                                                                                                                                                                                                                                                                                                                                                                                                                                                                                                                                                                                                                                           |
| Article Type:                 | Original research                                                                                                                                                                                                                                                                                                                                                                                                                                                                                                                                                                                                                                                             |
| Date Submitted by the Author: | 16-Jun-2020                                                                                                                                                                                                                                                                                                                                                                                                                                                                                                                                                                                                                                                                   |
| Complete List of Authors:     | Palinkas, Lawrence A.; University of Southern California, Suzanne Dworak-Peck School of Social Work<br>Whiteside, Lauren ; University of Washington School of Medicine, Emergency Medicine<br>Nehra, Deepika; University of Washington School of Medicine, Surgery<br>Engstrom, Allison ; University of Washington School of Medicine, Psychiatry & Behavioral Sciences<br>Taylor, Mark; Harborview Medical Center, Division of Trauma, Burn and Critical Care Surgery<br>Moloney, Kathleen; University of Washington School of Medicine, Psychiatry & Behavioral Sciences<br>Zatzick, Douglas; University of Washington School of Medicine, Psychiatry & Behavioral Sciences |
| Keywords:                     | ACCIDENT & EMERGENCY MEDICINE, ORTHOPAEDIC & TRAUMA SURGERY, INFECTIOUS DISEASES, Adult psychiatry < PSYCHIATRY, Public health < INFECTIOUS DISEASES                                                                                                                                                                                                                                                                                                                                                                                                                                                                                                                          |
|                               |                                                                                                                                                                                                                                                                                                                                                                                                                                                                                                                                                                                                                                                                               |

SCHOLARONE™  
Manuscripts

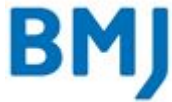

I, the Submitting Author has the right to grant and does grant on behalf of all authors of the Work (as defined in the below author licence), an exclusive licence and/or a non-exclusive licence for contributions from authors who are: i) UK Crown employees; ii) where BMJ has agreed a CC-BY licence shall apply, and/or iii) in accordance with the terms applicable for US Federal Government officers or employees acting as part of their official duties; on a worldwide, perpetual, irrevocable, royalty-free basis to BMJ Publishing Group Ltd ("BMJ") its licensees and where the relevant Journal is co-owned by BMJ to the co-owners of the Journal, to publish the Work in this journal and any other BMJ products and to exploit all rights, as set out in our [licence](#).

The Submitting Author accepts and understands that any supply made under these terms is made by BMJ to the Submitting Author unless you are acting as an employee on behalf of your employer or a postgraduate student of an affiliated institution which is paying any applicable article publishing charge ("APC") for Open Access articles. Where the Submitting Author wishes to make the Work available on an Open Access basis (and intends to pay the relevant APC), the terms of reuse of such Open Access shall be governed by a Creative Commons licence – details of these licences and which [Creative Commons](#) licence will apply to this Work are set out in our licence referred to above.

Other than as permitted in any relevant BMJ Author's Self Archiving Policies, I confirm this Work has not been accepted for publication elsewhere, is not being considered for publication elsewhere and does not duplicate material already published. I confirm all authors consent to publication of this Work and authorise the granting of this licence.

1  
2  
3 **A Rapid Ethnographic Assessment of the COVID-19 Pandemic April 2020 “Surge” and its**  
4 **Impact on Service Delivery in an Acute Care Medical Emergency Department and Trauma**  
5 **Center**  
6  
7

8 Lawrence A. Palinkas, PhD  
9 Albert G. and Frances Lomas Feldman Professor of Social Policy and Health  
10 Suzanne Dworak-Peck School of Social Work  
11 University of Southern California  
12 E-mail: [palinkas@usc.edu](mailto:palinkas@usc.edu)  
13

14  
15 Lauren Whiteside MD, MSPH  
16 Assistant Professor  
17 Harborview Injury Prevention & Research Center &  
18 Department of Emergency Medicine  
19 University of Washington School of Medicine  
20 E-mail: [laurenkw@uw.edu](mailto:laurenkw@uw.edu)  
21

22  
23 Deepika Nehra, MD  
24 Assistant Professor  
25 Department of Surgery  
26 University of Washington School of Medicine  
27 E-mail: [deepikan@uw.edu](mailto:deepikan@uw.edu)  
28

29  
30 Allison Engstrom, MSW  
31 Social Worker  
32 Department of Psychiatry and Behavioral Sciences  
33 University of Washington School of Medicine  
34 E-mail: [alliengs@uw.edu](mailto:alliengs@uw.edu)  
35

36  
37 Mark Taylor, RN  
38 Trauma Program Manager  
39 Division of Trauma, Burn and Critical Care Surgery  
40 Harborview Medical Center  
41 E-mail: [marct@uw.edu](mailto:marct@uw.edu)  
42

43  
44 Kathleen Moloney, BA  
45 Research Coordinator  
46 Department of Psychiatry and Behavioral Sciences  
47 University of Washington School of Medicine  
48 E-mail: [kmoloney@uw.edu](mailto:kmoloney@uw.edu)  
49

50  
51 Douglas Zatzick, MD  
52 Professor  
53 Harborview Injury Prevention & Research Center &  
54 Department of Psychiatry and Behavioral Sciences  
55 University of Washington School of Medicine  
56  
57  
58  
59

1  
2  
3  
4  
5  
6  
7  
8  
9  
10  
11  
12  
13  
14  
15  
16  
17  
18  
19  
20  
21  
22  
23  
24  
25  
26  
27  
28  
29  
30  
31  
32  
33  
34  
35  
36  
37  
38  
39  
40  
41  
42  
43  
44  
45  
46  
47  
48  
49  
50  
51  
52  
53  
54  
55  
56  
57  
58  
59  
60

E-mail: [dzatzick@uw.edu](mailto:dzatzick@uw.edu)

Corresponding Author:  
Lawrence A. Palinkas, PhD  
Albert G. and Frances Lomas Feldman Professor of Social Policy and Health  
Phone: (213) 740-3990  
E-mail: [palinkas@usc.edu](mailto:palinkas@usc.edu)  
Suzanne Dworak-Peck School of Social Work  
University of Southern California  
669 W. 34th Street, MC0411  
Los Angeles, CA 90089-0411

For peer review only

## ABSTRACT

**Objectives:** Assess the impacts of the COVID-19 pandemic on service delivery by front-line health care providers in acute care medical and emergency department settings and identify strategies used to cope with pandemic-related physical and mental health demands.

**Design:** Rapid clinical ethnography of patient-provider encounters during an initial pandemic “surge” conducted by a team of clinician-researchers using a structured protocol for qualitative data collection and analysis.

**Setting:** Level 1 trauma center in Seattle, Washington in April 2020.

**Participants:** Front-line clinical providers serving as participant observers during performance of their clinical duties recorded observations and summaries of conversations with other providers and patients.

**Results:** We identified four different kinds of impacts: procedural, provider, patient, and overall. Each impact highlighted two or more levels of a socio-ecological model of services delivery: 1) the epidemiology of COVID-19, 2) outer setting, 3) inner or organizational setting, and 4) individual patient and provider. Despite significant changes in procedures that included COVID-19 screening of all admitted patients, social distancing and use of PPE, as well as changes in patient and provider behavior, the overall impact of the pandemic on the emergency department and acute care service delivery was minimal. This is attributed to having a smaller surge than expected, a quick response by the healthcare system to anticipated demands for service delivery and protection of patients and providers, adequate supplies, and high provider morale.

**Conclusions:** Although limited to one setting in one healthcare system in one community, the findings offer some important lessons for healthcare systems that have yet to be impacted as well as systems that have been more severely impacted. Each of the socio-ecological framework

1  
2  
3  
4  
5  
6  
7  
8  
9  
10  
11  
12  
13  
14  
15  
16  
17  
18  
19  
20  
21  
22  
23  
24  
25  
26  
27  
28  
29  
30  
31  
32  
33  
34  
35  
36  
37  
38  
39  
40  
41  
42  
43  
44  
45  
46  
47  
48  
49  
50  
51  
52  
53  
54  
55  
56  
57  
58  
59  
60

levels were found to impact service delivery to patients, and variations at each of these levels account for variations in that quality of care globally.

**Trial registration:** Clinicaltrials.gov NCT03569878

For peer review only

## STRENGTHS AND LIMITATIONS OF THIS STUDY

- We conducted a rapid clinical ethnography of patient-provider encounters during an initial COVID-19 pandemic “surge” in Seattle, Washington to assess the impacts on service delivery by front-line health care providers in acute care medical and emergency department settings and identify strategies used to cope with pandemic-related physical and mental health demands.
- The COVID-19 outbreak resulted in significant changes in acute care clinical procedures, the behaviors of patients and providers, and overall healthcare system performance that were influenced by four different levels of a socio-ecological model of service delivery at a healthcare system that was one of the first in the United States to be impacted by the pandemic.
- Providers reported widespread anxiety related to infection and transmission of COVID-19 to family members, along with depression related to perceived limitations to delivering care and stress related to the pandemic’s financial impacts and prolonged isolation and confinement.
- Providers also reported widespread use of coping strategies and resources to prevent disease spread and deliver high quality healthcare.
- Although limited to one setting in a single US healthcare system where the impacts associated with the pandemic have not been as severe to date as has been the case elsewhere, the findings also offer important lessons for healthcare system providers responding to the COVID-19 pandemic in other settings across the globe.



## INTRODUCTION

In January of 2020, the World Health Organization announced the emergence of a novel coronavirus (COVID-19) in Wuhan, China.<sup>1</sup> Since then, COVID-19 has become a global pandemic on a scale not seen since the 1918 influenza pandemic, which led to an estimated 50,000,000 deaths.<sup>2</sup> As of May 29, 2020, there were over 5.8 million confirmed cases of COVID-19 and 361,270 deaths across the globe; the United States is perhaps the most severely impacted nation with more than 1.7 million confirmed cases and 101,706 deaths.<sup>3</sup> In most states, all non-essential businesses and services were closed and employees were laid off or furloughed, resulting in a national unemployment rate of 14.7 percent in April 2020.<sup>4</sup> Social distancing and use of face masks, closure of non-essential businesses, and mandated quarantines and sheltering in place have been used to control the spread of the disease<sup>5</sup>

Along with other forms of natural disasters and acts of terrorism, infectious disease outbreaks or pandemics often result in a surge in demand for medical care, beginning with emergency departments (ED).<sup>6</sup> Health care systems generally plan responses to such surges by having a pandemic preparedness plan in place for triaging and caring for exposed patients. However, studies that have examined the impact of infectious disease outbreaks on service delivery have generally been retrospective and focused on patterns of admissions and discharges in EDs.<sup>6-8</sup> To date, there have been no studies conducted during a pandemic that have focused on the challenges to delivering acute care services and the extent to which these challenges were addressed by system policies and individual provider practices.

One of the potential influences of infectious disease outbreaks on service delivery in acute care settings is diminished performance due to stress and decrements in mental health. Burnout in health care professionals is frequently associated with poor-quality care.<sup>9,10</sup> Front-line

1  
2  
3 health care providers currently responding to the exponential increase in demands for care  
4 associated with the COVID-19 pandemic share many of the same risk factors for adverse mental  
5 health outcomes as those responding to other forms of disaster.<sup>6,11,12</sup> Several studies of infectious  
6 disease outbreaks, including the 2003 SARS outbreaks in Asia and Canada and the 2012 MERS  
7 outbreak in Saudi Arabia, have documented elevated levels of stress, anxiety, depression and  
8 posttraumatic stress disorder,<sup>13-19</sup> which often persist years after the outbreak.<sup>20,21</sup> Lack of social  
9 support and communication, maladaptive coping, and lack of training were important risk factors  
10 for developing negative psychological outcomes across all types of disasters.  
11  
12  
13  
14  
15  
16  
17  
18  
19  
20

21  
22 However, the current COVID-19 pandemic is unique in several respects. The number of  
23 cases testing positive for the novel coronavirus and the number of hospital admissions and deaths  
24 has exceeded that of previous respiratory disease pandemics, including SARS and MERS, and  
25 differs from these pandemics in terms of infectious period, transmissibility, clinical severity, and  
26 extent of community spread.<sup>22</sup> In an effort to “flatten the curve” of disease transmission,  
27 morbidity and mortality, health care providers will be exposed for a longer period of time than is  
28 the case in other pandemics<sup>23</sup> Front-line providers are confronting the possibility of becoming  
29 infected themselves, thereby increasing the risk of coronavirus-related morbidity and mortality,  
30 and preventive measures such as social distancing will likely impact both personal and  
31 professional behaviors. A recently published investigation of mental health outcomes among  
32 health care workers in Wuhan, China found that engagement in direct diagnosis, treatment and  
33 care of patients with COVID-19 was associated with a higher risk of symptoms of depression,  
34 anxiety, insomnia, and distress.<sup>24</sup> Although these features of the current pandemic have been  
35 prominent in the news media,<sup>25</sup> to date, there have been no systematic studies of these impacts on  
36 service delivery. Moreover, the focus of media attention has been on health care systems in  
37  
38  
39  
40  
41  
42  
43  
44  
45  
46  
47  
48  
49  
50  
51  
52  
53  
54  
55  
56  
57  
58  
59  
60

1  
2  
3 locations like New York City and in Spain and Italy that have been most severely impacted by  
4  
5 the number of patients testing positive for COVID-19. Little is known of its impacts on  
6  
7 healthcare systems in communities where the outbreak has been less dramatic to date and how  
8  
9 front-line providers in these systems are coping with these impacts.  
10  
11

12 To address the lack of information on these issues, we used a novel technique for  
13  
14 conducting a rapid ethnographic assessment of the impacts of the COVID-19 pandemic on  
15  
16 physicians and staff of a Level 1 trauma center of Harborview Medical Center in Seattle  
17  
18 Washington that was among the first in the United States to be impacted by the pandemic.<sup>26</sup>  
19  
20 Based on a social-ecological model of service delivery that has been used in ER settings,<sup>27,28</sup> our  
21  
22 study had two aims: 1) assess the impacts of the COVID-19 pandemic on service delivery by  
23  
24 front-line health care providers working in acute care medical and emergency department  
25  
26 settings at the trauma center; and 2) identify strategies being used by these providers to cope with  
27  
28 the increased physical and mental health demands associated with the pandemic.  
29  
30  
31

## 32 33 **METHODS**

### 34 35 **Design Overview**

36  
37 The investigation reported here was a secondary study embedded within a larger randomized  
38  
39 comparative effectiveness trial of the impact of a peer-integrated acute care to primary care and  
40  
41 community care coordination intervention.<sup>29</sup> To assess implementation of the evidence-based  
42  
43 interventions, we utilized a mixed methods protocol that incorporates principles of Rapid  
44  
45 Assessment Procedures and Clinical Ethnography.<sup>30</sup> The Rapid Assessment Procedure Informed  
46  
47 Clinical Ethnography (RAPICE) approach was previously utilized to describe primary and  
48  
49 secondary COVID-19 preventive interventions, as well as ethical tensions and stepped coping  
50  
51 strategies in the early days and weeks of the pandemic.<sup>31</sup> In the study reported here, RAPICE  
52  
53  
54  
55  
56  
57  
58  
59

1  
2  
3 was utilized because the research team had already been trained in its use and had collected  
4 ethnographic data at the trauma center related to the parent study prior to the COVID-19  
5 outbreak,<sup>30</sup> it was originally developed as a tool iteratively assess and inform care delivery  
6 during mass violence events<sup>30</sup> and natural disasters,<sup>33</sup> it could be implemented with minimal  
7 additional resources within the framework of the larger comparative effectiveness trial, it is a  
8 minimally invasive form of data collection that can be used when priority was given to service  
9 delivery, and it can provide a depth of understanding to the challenges faced in service delivery  
10 not available from quantitative surveys.  
11  
12  
13  
14  
15  
16  
17  
18  
19  
20

### 21 **Participants**

22 Study participants were patients and providers who interacted with or otherwise were observed  
23 by members of the parent study research team (n = 5) engaged in the delivery of care within the  
24 Trauma Center (TC) at Harborview Medical Center during a COVID-19-related April 2020  
25 “surge”. The facility is the only designated Level I trauma and burn center in Washington state  
26 and is the regional trauma and burn referral center for Alaska, Montana, and Idaho. The 412-bed  
27 facility has around 17,000 admissions, 259,000 clinic visits, and 59,000 ED visits annually<sup>34</sup>  
28 During the month of April 2020, the hospital had 1,089 total admissions. On average, the daily  
29 COVID-19 census was 18 patients (range = 10-26 patients). Research team members included a  
30 trauma surgeon, emergency department physician, trauma center nurse manager, acute care  
31 medical consultation-liaison psychiatrist, and social worker. Each team member had an  
32 opportunity to observe various components of acute care delivery, from triage management and  
33 emergency care to surgical procedures, in-hospital mental health service delivery, and trauma  
34 center to primary care linkages. Participants were given training by the first author to assume the  
35 role of POs during their shifts in the TC.  
36  
37  
38  
39  
40  
41  
42  
43  
44  
45  
46  
47  
48  
49  
50  
51  
52  
53  
54  
55  
56  
57  
58  
59  
60

## Data Collection

Data included observations and interactions with patients and other providers made while engaged in delivering routine clinical services. Participant observers were charged with observing and recording the following: events that illustrate the impacts of the pandemic on provider performance and well-being; reports shared with POs by acute care providers and staff of physical and emotional impacts of additional workload; observed impacts of the pandemic on provider interactions with patients, family members and other providers; and instances of strategies used by providers to cope with the increased personal and professional demands imposed by the pandemic.

Information on these observations and interactions were recorded through periodic jottings summarizing observations and interactions and more detailed field notes that could be updated each day. Field notes also included impressions of events observed and exchanges with other providers and staff, as well as preliminary interpretations of the significance of these events and exchanges. Each PO then participated in a semi-structured debriefing interview with the first author to clarify and expand upon information contained in jottings and field notes and provide a preliminary interpretation of their observations and interactions. Debriefs were conducted using the Zoom conferencing platform, recorded, and transcribed for analysis.

## Data Analysis

The first author reviewed all data collected by the POs, and performed a preliminary analysis, using the immersions/crystallization<sup>35</sup> and focused thematic analysis techniques<sup>36</sup> that are part of the RAPICE methodology.<sup>30</sup> The first author reviewed the data and then queried each PO during the debrief to gain more insight into the data and its context and to obtain a preliminary interpretation of the meaning and significance of data provided by the PO. Field notes,

1  
2  
3 documents and transcripts of debriefs and the member-checking debriefing interviews were then  
4  
5 coded by the first author to condense the data into analyzable units. Segments of text ranging  
6  
7 from a phrase to several paragraphs were assigned codes based on a priori (e.g., from a semi-  
8  
9 structured interview guide) or emergent themes (also known as open coding). Following the open  
10  
11 coding, codes were assigned to describe connections between and within categories (also known  
12  
13 as axial coding). Based on these codes, QSR NVivo 12 was used to generate a series of themes  
14  
15 arranged in a treelike structure connecting text segments grouped into separate categories of  
16  
17 codes or “nodes.” Consistent with previously explicated RAPICE methods,<sup>30</sup> a discussion then  
18  
19 ensued until both the POs and the first author reached consensus as to the meaning and  
20  
21 significance of the data.  
22  
23  
24  
25

### 26 **Patient and Public Involvement**

27  
28 Patients and the public were not involved in the design or execution of this study.  
29

### 30 **RESULTS**

31  
32 Overall, our analysis revealed four broad impacts of the COVID-19 pandemic on service  
33  
34 delivery: 1) impacts on procedures, 2) impacts on providers, 3) impacts on patients, and 4)  
35  
36 overall impacts on quality of care. Each of these themes are linked together at four broad levels  
37  
38 of a socio-ecological model of influences on patient care, illustrated in Figure 1 below.  
39  
40  
41

42 Figure 1 about here

43  
44 The outermost or environmental level is dictated by the novel coronavirus and its global  
45  
46 spread and includes the nature of virus transmission; social and biological characteristics of risk  
47  
48 and resilience; public health guidelines for preventing the spread of infection; risk of re-  
49  
50 infection; disease sequelae; survival rates; and clinical outcomes. The second level is the external  
51  
52 or macro service setting that has dictated the supply (e.g., availability of personnel and  
53  
54  
55  
56  
57  
58  
59  
60

1  
2  
3 equipment like PPE and ventilators) and demand (e.g., number of patients seen overall, patients  
4 who test positive for COVID-19 or are under investigation for having COVID-19, and the nature  
5 of the problems seen). The third level is the internal or mezzo service setting of the healthcare  
6 system and includes the availability of beds to handle increased demand, healthcare system  
7 guidelines and policies put in place to ensure the safety and health of both patients and providers,  
8 and the transition to delivery of services using telehealth platforms to reduce the need for  
9 patients to be physically present at the hospital. The fourth level is that of the individual provider  
10 and patient or micro service setting and includes variations in the demands placed on individuals  
11 that include the anxiety related to fear of infection, depression, ethical conflicts, social tension,  
12 and stress, and the resources and strategies used by individuals to cope with these demands.  
13  
14  
15  
16  
17  
18  
19  
20  
21  
22  
23  
24  
25

### 26 **Theme 1. Impacts on Procedures**

27  
28 The first theme of impacts on procedures and quality of care can be divided into three  
29 subthemes: 1) challenges related to testing patients for COVID-19; 2) altering procedures to  
30 insure adequate social distancing; and 3) use of PPE. Each of these represent the  
31 interconnections between Levels 1 to 4 described above and are examined in detail below.  
32  
33  
34  
35  
36

37 Illustrative quotations from fieldnotes and interviews for each subtheme are provided in Table 1.  
38  
39

40 Table 1 about here

#### 41 COVID-19 testing

42  
43  
44 The implementation of a policy that all patients requiring acute care undergo testing for COVID-  
45 19 because of a need to preserve PPE for confirmed COVID-19 patients or patients at high risk  
46 for COVID-19 has resulted in delays in getting treatment for often life-threatening conditions.  
47  
48 For patients with severe mental health issues, getting consent to perform testing has been  
49  
50  
51  
52  
53  
54  
55  
56  
57  
58  
59  
60

1  
2  
3 similar to those of COVID-19, such as withdrawal from heroin or other illicit substances.  
4  
5 Although the delays in getting treatment do not appear to have compromised the quality of care  
6  
7 received, providers expressed concern that patients needing urgent but not immediate attention  
8  
9 become sicker while awaiting COVID-19 test results. Experience with guideline implementation  
10  
11 and its effects on workflow and service delivery, along with information from other healthcare  
12  
13 systems, led to changes in guidelines and protocols for COVID-19 screening. Changes in  
14  
15 guidelines resulted in delays in delivering care and confusion over what guidelines were in effect  
16  
17 at any point in time.  
18  
19  
20

### 21 Distancing

22  
23 Imposition of social distance guidelines for the benefit of both patients and providers led to  
24  
25 several changes in procedures, including reducing the need for patients to come to ED and  
26  
27 suspension of nonessential procedures. Social distancing guidelines also impacted patterns of  
28  
29 interactions among providers. Routine interactions such as morning briefings and grand rounds  
30  
31 with residents were either suspended or conducted remotely. Conferences with colleagues  
32  
33 concerning patient clinical status and treatment were altered by requirements for physical  
34  
35 separation (e.g., limiting the number of providers in a patient's room, communicating remotely.  
36  
37  
38  
39

40 Perhaps the greatest impact of social distancing guidelines noted by POs was the  
41  
42 restrictions on the presence of family members. This was especially problematic because the  
43  
44 restrictions deprived patients of essential sources of social and emotional support, making it  
45  
46 difficult for providers to communicate with family members and for family members to be  
47  
48 updated on patient status, and led to some patients dying alone without family members being  
49  
50 present.  
51  
52  
53  
54  
55  
56  
57  
58  
59  
60



1  
2  
3 In some settings like behavioral health and outpatient psychiatry, there was a greater use  
4 of telehealth services. For the most part, these services were provided over the telephone or on  
5 the Zoom platform. Because of social distancing, some behavioral health consultations were  
6 performed without use of standard assessment protocols (i.e., administration of questionnaires to  
7 evaluate mental health status). Moreover, some patients expressed reluctance or unwillingness to  
8 obtain treatment by telephone, making service delivery problematic. This reluctance led to  
9 concerns about the quality of care delivered to such patients.

### 19 Use of PPE

21 There are several facets of PPE use that were mentioned by providers, including policies that  
22 were designed to preserve the supply of PPEs in units like the operating rooms, challenges  
23 involved in wearing PPEs, including the time involved in “donning and doffing” which created  
24 delays in performing procedures, and the perceptual separation from patients created by the  
25 PPEs. Providers were required to undergo training in the use of PPEs and were monitored for  
26 proper use in the workplace. Some providers commented on the potential risk of infection  
27 created by improper use and to the unwillingness of other providers to using PPEs in some units  
28 prior to the implementation of new guidelines mandating their use

### 40 **Theme 2, Impacts on providers**

42 The second major theme related to the impact of the pandemic in general and its impact on  
43 service delivery in particular to the providers themselves. This theme was segmented into three  
44 distinct subthemes (Table 2): 1) risk of infection; 2) negative impacts; and 3) provider coping  
45 strategies and resources.

51 Table 2 about here

### 54 Risk of infection

1  
2  
3 The first subtheme was provider assessments of the risk of infection to themselves and to family  
4 members. Unlike other healthcare systems where providers have died from COVID-19, there  
5 have been no known reported provider deaths in this healthcare system, even though it is widely  
6 recognized that some providers have tested positive for COVID-19. Nevertheless, although POs  
7 did report instances of a lack of concern by themselves or by others, sometimes reflected in the  
8 absence of masks worn in workspaces prior to the establishment of a policy making their use  
9 mandatory, they also cited numerous instances of concern about getting infected. These concerns  
10 extended to the risk of infecting family members. The risk of infection was associated with  
11 factors such as the provider's age, occupation (e.g., anesthesiologists), and work setting (e.g.,  
12 operating room, ICU).  
13  
14  
15  
16  
17  
18  
19  
20  
21  
22  
23  
24  
25

#### 26 Negative impacts

27  
28 Negative impacts of the pandemic on hospital staff, included anxiety related to the fear of  
29 infection to self and family members; feelings of sadness and depression related to separation of  
30 family members from dying patients and not being able to deliver necessary care, the experience  
31 of ethical tensions related to the perceived risk of coming to work sick and infecting others,  
32 engaging in other forms of risk behavior like violating stay at home orders, and the concern that  
33 some forms of care are currently being or will likely be rationed; guilt over having the  
34 opportunity to interact with colleagues when others must stay at home; interactions with  
35 colleagues that highlight undercurrents of social tension related to professional disciplinary  
36 differences (e.g., research vs clinical care) or failure to adhere to guidelines regarding distancing;  
37 and stress related to other aspects of the pandemic, including financial stability, impacts on loved  
38 ones, and isolation and confinement at place of residence.  
39  
40  
41  
42  
43  
44  
45  
46  
47  
48  
49  
50  
51  
52

#### 53 Provider coping strategies and resources

1  
2  
3 A third subtheme reflected different strategies and techniques employed by providers to cope  
4 with changes in service delivery and their impacts on both quality of care and on provider mental  
5 health. Participant observers noted several instances of innovation in performing procedures  
6 while adhering to guidelines intended to protect both providers and patients from infection.  
7  
8 These included adapting procedures for performing psychiatric evaluations for patients and  
9 development of workarounds to ensure service delivery.  
10  
11

12  
13  
14  
15  
16  
17 A second important form of coping revolved around efforts to engage in behaviors and  
18 practices intended to reduce the risk of infection to self and others. These included behaviors at  
19 the workplace (use of homemade gels to clean hands or commercially available disinfectants to  
20 deep-clean workspaces, not wearing street clothes or jewelry), outside of work (changing clothes  
21 before going shopping, practicing social distancing), and at home (changing clothes before going  
22 indoors, showering, and physical separation, including staying in hotel rooms or Air B&Bs).  
23  
24  
25  
26  
27  
28  
29

30  
31 Social support was another significant coping resource reported by the participant  
32 observers. This included support provided by family members, some of whom were themselves  
33 healthcare providers, and support from colleagues at work such as assistance in donning PPE,  
34 sharing of PPE, and adjusting schedules to cover for colleagues at risk for infection and illness. It  
35 also included support from the community, manifested in deliveries of food and public  
36 expressions of gratitude.  
37  
38  
39  
40  
41  
42  
43

44  
45 A fourth important coping resource was the availability of mental health services. The  
46 healthcare system provided counseling services to providers and staff. These included drop-in  
47 sessions for all hospital employees with mental health service providers and drop-in sessions  
48 developed by individual units or departments within the system. Both types of sessions occurred  
49  
50  
51  
52  
53  
54  
55  
56  
57  
58  
59  
60

1  
2  
3 over Zoom. Although the services provided were acknowledged to be helpful by those providers  
4 and staff who utilized them, there was also a sense that they were not widely used.  
5  
6

7  
8 A fifth important resource was information. With experience and information provided  
9  
10 by the system and preliminary research by others, the level of uncertainty associated with the  
11  
12 pandemic, including risk of infection, duration of the pandemic, and best practices for treatment,  
13  
14 appeared to be diminishing, if only by degrees.  
15  
16

17  
18 Finally, there were numerous reports of attempts at self-care. These included a focus on  
19  
20 healthy eating habits, adopting alternative forms of physical exercise, engaging in mindfulness  
21  
22 and reflexivity, and spending more time outdoors.  
23

### 24 **Theme 3. Impact on patients**

25  
26 The third theme was the impact of the pandemic on the patients seen in the acute care setting.  
27  
28 This theme included four subthemes (Table 3): 1) patient access to care; 2) patient fears of  
29  
30 getting infected at the hospital; 3) changes in presenting problems; and 4) disparities in patient  
31  
32 risk for COVID-19 and healthcare access.  
33  
34

35 Table 3 about here

#### 36 Patient access to care

37  
38  
39 One of the biggest challenges faced by patients has been in getting access to care. The ED saw  
40  
41 more patients who had appointments for nonessential care in other departments cancelled due to  
42  
43 office closures. POs also noted changes in patient-provider interactions resulting from social  
44  
45 distancing and PPE use and the suspension of nonessential procedures.  
46  
47  
48

#### 49 Fear of getting infected at the hospital

1  
2  
3 Patients expressed concerns about becoming infected while getting treated at the hospital and  
4  
5 infecting family members in turn. Other patients have delayed getting medications refilled at the  
6  
7 hospital to reduce the risk of infection.  
8  
9

#### 10 Changes in presenting problems

11  
12 Some of the POs also noted more patients with mental and behavioral health issues that have  
13  
14 been exacerbated by the threat of infection, collapse of the economy, and the challenges in  
15  
16 obtaining medication and nonessential clinical services. Delays in seeking or receiving services  
17  
18 due to the pandemic was also perceived to result in patients presenting with more severe  
19  
20 symptoms or clinical conditions when they are finally seen.  
21  
22

#### 23 Disparities in risk for infection

24  
25 Finally, the pandemic has illustrated the health disparities that have long been associated with the  
26  
27 risk of illness and the accessibility of health care. Providers reported several instances of patients  
28  
29 from disadvantaged backgrounds, including older adults, homeless, non-English-speaking  
30  
31 immigrants, the poor, and the disabled, who are overrepresented in acute care safety-net settings  
32  
33 under normal circumstances, but who also test positive for the novel coronavirus or are a  
34  
35 COVID-19 PUI (person under investigation) and who reside in households where the risk of  
36  
37 transmission of the virus is high.  
38  
39  
40  
41

#### 42 **Theme 4. Overall impact on quality of care**

43  
44 Despite concerns expressed by staff over the potential effects of delays in testing for COVID-19  
45  
46 and the challenges associated with social distancing and PPE use, the overall quality of care  
47  
48 delivered to patients does not appear to have been significantly affected. This is attributed by  
49  
50 providers and staff to four factors (Table 4). First, the April 2020 surge was less than anticipated.  
51  
52  
53 After the initial outbreak of cases, the pandemic had more of an impact on assessment of cases  
54  
55  
56  
57  
58  
59  
60

1  
2  
3 that were coming in than on the number of patients actually treated. Workload did increase in  
4  
5 many instances due to the imposition of new procedures related to PPE, distancing and coverage  
6  
7 for personnel at risk for infection, but there was no sense that people were working longer hours,  
8  
9 for instance. Second, the system was viewed by its employees as having been prepared for the  
10  
11 pandemic from an operations perspective. With the initial outbreak at an assisted-care nursing  
12  
13 facility in a suburban community, a regional incidence response plan and hospital guidelines for  
14  
15 patient screening, social distancing and PPE use were implemented. Some of those guidelines  
16  
17 changed over time as the anticipated surge failed to materialize and as experience dictated  
18  
19 necessary improvements to reduce delays and maintain standards for service delivery. Third,  
20  
21 while some supplies such as N95 masks were in short supply and procedures for screening ED  
22  
23 patients for COVID-19 were based on the perceived need to limit provider use of PPE to patients  
24  
25 who tested positive or were at significant risk for infection, supplies viewed as essential for  
26  
27 responding to the pandemic, including PPE and ventilators, were available and adequate to the  
28  
29 current demand. Finally, despite the negative impacts on providers listed earlier, morale among  
30  
31 hospital staff was high. Providers and staff appeared to be managing with the resources available  
32  
33 to them that enable them to provide the best care possible, seek emotional support, engage in  
34  
35 self-care, and exercise preventive measures designed to reduce the risk of infection.  
36  
37  
38  
39  
40  
41

42 Table 4 about here

## 43 **DISCUSSION**

44  
45 This study identified four different kinds of impacts of the COVID-19 pandemic on delivery of  
46  
47 clinical services in a Level 1 trauma center during a surge of cases that occurred the month of  
48  
49 April 2020: procedural, provider, patient, and overall. Each impact highlighted two or more  
50  
51 levels of a socio-ecological model of services delivery: the outermost or environmental service  
52  
53  
54  
55  
56  
57  
58  
59  
60

1  
2  
3 setting framed by the novel coronavirus and its global spread, the external or macro service  
4  
5 setting framed by the supply and demand for care; the internal or mezzo service setting framed  
6  
7 by guidelines and policies put in place to ensure the safety and health of both patients and  
8  
9 providers, and the micro service setting framed by individual patient and provider behavior.  
10  
11 Despite significant changes in procedures that included COVID-19 screening of all admitted  
12  
13 patients, social distancing and use of PPE, as well as changes in patient characteristics and  
14  
15 provider behavior, the overall impact of the pandemic on the quality of service delivery, as  
16  
17 described by front-line providers, appears to have been minimal. This is attributed to having a  
18  
19 smaller surge than expected, a quick response by the healthcare system to anticipated demands  
20  
21 for service delivery and protection of patients and providers, available supplies, and high  
22  
23 provider morale.  
24  
25  
26  
27

28 Consistent with studies of earlier infectious disease pandemics,<sup>13-23</sup> and recent reports  
29  
30 published during the early phases of the COVID-19 pandemic in China,<sup>37</sup> Italy,<sup>38</sup> and the U.S.,<sup>39</sup>  
31  
32 reports of anxiety and fear of infection among trauma center providers and staff were  
33  
34 widespread. Providers also reported instances of stress related to other aspects of the pandemic,  
35  
36 including financial stability, impacts on loved ones, and isolation and confinement, which have  
37  
38 also been found in studies of other pandemics.<sup>15,16</sup> However, there were also reports of depressed  
39  
40 mood related to separation of family members from sick and dying patients and not being able to  
41  
42 deliver necessary care, the experience of ethical tensions related to the perceived risk of coming  
43  
44 to work sick and infecting others, engaging in other forms of risk behavior like violating stay at  
45  
46 home orders, and the concern that some forms of care were currently being or likely to be  
47  
48 rationed; guilt over having the opportunity to interact with colleagues when others must stay at  
49  
50 home; and interactions with colleagues that highlight undercurrents of social tension related to  
51  
52  
53  
54  
55  
56  
57  
58  
59  
60

1  
2  
3 professional disciplinary differences or failure to adhere to guidelines regarding distancing.

4  
5 These impacts have not been reported in previous studies of the psychological impacts of other  
6  
7 infectious disease pandemics on healthcare providers.<sup>13-22</sup>

8  
9  
10 It is also quite likely that levels of anxiety and fear of infection was much less than has  
11  
12 been reported in other healthcare systems because the surge was much less than anticipated and  
13  
14 because there were no reports of providers and staff becoming severely ill or dying despite a  
15  
16 positive test.<sup>31</sup> Earlier studies of ED personnel and infectious disease pandemics have also noted  
17  
18 lower than expected prevalence of mental health problems, which have been attributed to the  
19  
20 greater resilience of individuals who choose this type of work.<sup>21</sup> We also identified several  
21  
22 strategies used by providers and staff to cope with the pandemic and its organizational and  
23  
24 individual impacts. Adaptive coping has been associated with reduced risk of psychiatric  
25  
26 morbidity has been reported in studies of other respiratory disease outbreaks.<sup>12,16,17,21</sup>

27  
28  
29  
30  
31 The study occurred in a healthcare setting that was one of the first to be impacted by the  
32  
33 pandemic. However, the impacts associated with the pandemic in this setting have not been as  
34  
35 severe as has been the case elsewhere, especially in New York City, limiting the generalizability  
36  
37 of our findings. Furthermore, our findings are limited by the relative short duration of  
38  
39 participation observation (1-4 weeks) in a single setting (trauma/emergency medicine) and the  
40  
41 constraints of engaging in participant observation while also performing intensive clinical tasks  
42  
43 under conditions of social distancing and use of PPE. In contrast to studies of previous infectious  
44  
45 disease pandemics,<sup>13,14,17,18,20,21</sup> no standardized measures were used to assess mental health  
46  
47 status. Our assessment of impacts on the quality of service delivery was based entirely on self-  
48  
49 report or observational data and not on objective measures of quality of care.  
50  
51  
52  
53  
54  
55  
56  
57  
58  
59  
60



1  
2  
3 Despite these limitations, this study was one of the first to be conducted in the United  
4 States that examined the impact of a still-unfolding infectious disease pandemic in a health care  
5 setting representing the first point of entry for COVID-19-positive patients. Although previous  
6 studies of healthcare responses to infectious disease pandemics have also noted changes in  
7 procedures,<sup>13,15,18</sup> this is the first study to our knowledge to examine the impact of these changes  
8 on service delivery. The study utilized a standardized protocol for conducting ethnographic  
9 research that enabled us to collect and analyze data in a short period of time with minimal impact  
10 on patients or providers under conditions of social distancing and PPE use. The RAPICE  
11 approach also has potential for assessing these impacts longitudinally and providing formative  
12 evaluations of policies and procedures designed to mitigate them.  
13  
14  
15  
16  
17  
18  
19  
20  
21  
22  
23  
24  
25

## 26 CONCLUSIONS

27  
28 Although this study was conducted within one setting in one healthcare system in one  
29 community, the findings offer some important lessons for healthcare systems that have yet to be  
30 impacted, as well as systems that have been more severely impacted. Each of the levels in our  
31 socio-ecological model were found to impact the delivery of services to patients in the time of  
32 COVID-19, and variations at each of these levels account for variations in that delivery of care  
33 globally.  
34  
35  
36  
37  
38  
39  
40  
41

42 **Contributors:** LAP and DZ conceived and designed the study and the analysis plan. LAP and  
43 DZ conducted a review of the relevant literature. LAP designed the tables and figures for the  
44 manuscript. LW, DN, AE, MT, and DZ conducted the primary data collection for the study. LAP  
45 and KM coordinated the collection and management of study data. LAP and DZ conducted data  
46 analysis and interpretation. All authors contributed intellectual content during the drafting and  
47 revision of the manuscript and have reviewed and approve of the final version. The  
48  
49  
50  
51  
52  
53  
54  
55  
56  
57  
58  
59  
60

1  
2  
3 corresponding author attests that all listed authors meet authorship criteria and that no others  
4  
5 meeting the criteria have been omitted. LAP is the guarantor.  
6

7  
8 **Copyright/license for publication:** The Corresponding Author has the right to grant on behalf  
9  
10 of all authors and does grant on behalf of all authors, a worldwide licence to the Publishers and  
11  
12 its licensees in perpetuity, in all forms, formats and media (whether known now or created in the  
13  
14 future), to i) publish, reproduce, distribute, display and store the Contribution, ii) translate the  
15  
16 Contribution into other languages, create adaptations, reprints, include within collections and  
17  
18 create summaries, extracts and/or, abstracts of the Contribution, iii) create any other derivative  
19  
20 work(s) based on the Contribution, iv) to exploit all subsidiary rights in the Contribution, v) the  
21  
22 inclusion of electronic links from the Contribution to third party material where-ever it may be  
23  
24 located; and, vi) licence any third party to do any or all of the above.  
25  
26  
27

28  
29 **Funding:** This study was supported in part by the Patient-Centered Outcomes Research Institute  
30  
31 (PCORI) Award (IHS-2017C1-6151). This research was also supported within the National  
32  
33 Institutes of Health (NIH) Health Care Systems Research Collaboratory by cooperative  
34  
35 agreement 1UH2MH106338-01/4UH3MH106338-02 from the National Institute of Mental  
36  
37 Health. Support was also provided by the NIH Common Fund through cooperative agreement  
38  
39 U24AT009676 from the Office of Strategic Coordination within the Office of the NIH Director.  
40  
41 The content is solely the responsibility of the authors and does not necessarily represent the  
42  
43 official views of PCORI, its Board of Governors or Methodology Committee, or the NIH. The  
44  
45 funders of this study had no role in the study design, data collection, data analysis, data  
46  
47 interpretation, writing of the report, or decision to submit the manuscript for publication. The  
48  
49 corresponding author had full access to all study data and had the final responsibility for the  
50  
51 decision to submit the manuscript for publication.  
52  
53  
54  
55  
56  
57  
58  
59  
60

1  
2  
3 **Competing Interests:** All authors have completed the ICMJE uniform disclosure form at  
4 [www.icmje.org/coi\\_disclosure.pdf](http://www.icmje.org/coi_disclosure.pdf) and declare: support from the Patient-Centered Outcomes  
5  
6 Research Institute and National Institutes of Health for the submitted work; no financial  
7  
8 relationships with any organisations that may have an interest in the submitted work in the  
9  
10 previous three years; no other relationships or activities that could appear to have influenced the  
11  
12 submitted work.  
13  
14

15  
16  
17 **Ethical Approval:** All study procedures were approved by the IRBs of the University of  
18  
19 Washington and University of Southern California (UP-20-00298) prior to the initiation of the  
20  
21 investigation.  
22  
23

24 **Data Sharing:** Data used in this study is available from the corresponding author upon  
25  
26 reasonable request. All personal identifiers found in the data will be removed prior to sharing.  
27

28 **Dissemination to participants and related patient and public communities:** The study team  
29  
30 has an established track record of disseminating acute care medical findings through American  
31  
32 College of Surgeons policy summits and other national and international meeting forums.  
33

34  
35 **Transparency Statement:** The corresponding author (the manuscript's guarantor) affirms that  
36  
37 the manuscript is an honest, accurate, and transparent account of the study being reported; that  
38  
39 no important aspects of the study have been omitted; and that any discrepancies from the study  
40  
41 as planned (and, if relevant, registered) have been explained.  
42  
43  
44  
45  
46  
47  
48  
49  
50  
51  
52  
53  
54  
55  
56  
57  
58  
59  
60

**REFERENCES**

1. Cucinotta D, Vanelli M. WHO declares COVID-19 a pandemic. *Acta Biomed* 2020;91:157-60.
2. Taubenberger JK, Kash JC, Morens DM. The 1918 influenza pandemic: 100 years of questions answered and unanswered. *Sci Transl Med* 2019;11(502):eaau5485. doi: 10.1126/scitranslmed.aau5485.
3. The Johns Hopkins University and School of Medicine. Coronavirus Center. COVID-19 dashboard by the Center for Systems Science and Engineering (CSSE) at Johns Hopkins University. <https://coronavirus.jhu.edu/map.html>. (Accessed May 29, 2020).
4. Bureau of Labor Statistics. Unemployment rate rises to record high 14.7 percent in April 2020. [https://www.bls.gov/opub/ted/2020/unemployment-rate-rises-to-record-high-14-point-7-percent-in-april-2020.htm?view\\_full](https://www.bls.gov/opub/ted/2020/unemployment-rate-rises-to-record-high-14-point-7-percent-in-april-2020.htm?view_full) (Accessed May 15, 2020).
5. California Coronavirus (COVID-19) Response. Stay home except for essential needs. <https://covid19.ca.gov/stay-home-except-for-essential-needs/#top>. (Accessed May 4, 2020).
6. Morganstein JC, Fullerton CS, Ursano RJ, Donato D, Holloway HC. Pandemics: health care emergencies. In: Raphael B, Fullerton CS, Weisaeth L, Ursano RJ, eds. Textbook of disaster psychiatry, 2nd ed. New York: Cambridge University Press, 2017:270-84.
7. Rubinson L, Mutter R, Viboud C, et al. Impact of the fall 2009 influenza A(H1N1)pdm09 pandemic on US hospitals. *Med Care* 2013;51:259-65.
8. Schanzer DL, Schwartz B. Impact of seasonal and pandemic influence on emergency department visits, 2003-2010, Ontario, Canada. *Acad Emerg Med* 2013;20(4):388-97.

- 1  
2  
3 9. Panagioti M, Geraghty K, Johnson J, et al. Association between physician burnout and  
4 patient safety, professionalism, and patient satisfaction: a systematic review and meta-  
5 analysis. *JAMA Intern Med* 2018;178(10):1317-30.  
6  
7
- 8  
9  
10 10. Tawfik DS, Scheid A, Profit J, et al. Evidence relating health care provider burnout and  
11 quality of care: a systematic review and meta-analysis. *Ann Intern Med* 2019;171(8):555-67.  
12  
13
- 14 11. Benedek DM, Fullerton C, Ursano RJ. First responders: mental health consequences of  
15 natural and human made disasters for public health and public safety workers. *Annu Rev*  
16 *Public Health* 2016;28:55-68.  
17  
18
- 19 12. Naushad VA, Bierens JJ, Nishan KP, et al. A systematic review of the impact of disaster on  
20 the mental health of medical responders. *Prehosp Disaster Med* 2019;34(6):632-43.  
21  
22
- 23 13. Nickell LA, Crighton EJ, Tracy C, et al. Psychological effects of SARS on hospital staff:  
24 survey of a large tertiary care institution. *CMAJ* 2004;170(5):793-8.  
25  
26
- 27 14. Chua SE, Cheung V, Cheung C, et al. Psychological effects of SARS outbreak in Hong Kong  
28 on high risk health care workers. *Can J Psychiatry* 2004;49(6):391-3.  
29  
30
- 31 15. Bai Y, Lin CC, Lin CY, Chen JY, Chue CM, Chou P. Survey of stress reactions among  
32 health care workers involved with the SARS outbreak. *Psychiatr Serv* 2004;55(9):1055-7.  
33  
34
- 35 16. Wong, TW, Yau, JKY, Chan, CLW, et al. Psychological impact of severe acute respiratory  
36 syndrome outbreak on health care workers in an emergency department and how they  
37 cope. *Eur J Emerg Med* 2005;12(1):13-8.  
38  
39
- 40 17. Lin CY, Peng YC, Wu YH, Chang J, Chan CH, Yang DY. The psychological effect of severe  
41 acute respiratory syndrome on emergency staff. *Emerg Med J* 2007;24(1):12-7.  
42  
43  
44  
45  
46  
47  
48  
49  
50  
51  
52  
53  
54  
55  
56  
57  
58  
59

- 1  
2  
3 18. Goulia P, Mantas C, Dimitroula D, Mantis D, Hyphantis T. General hospital staff worries,  
4  
5 perceived sufficiency of information and associated psychological distress during the  
6  
7 A/H1N1 influenza pandemic. *BMC Infect Dis* 2010;10:322.  
8  
9
- 10 19. Mohammed AG, Turki A, Abdulla A. et al. Perception and attitude of emergency room  
11  
12 resident physicians toward the Middle East Respiratory Syndrome outbreak. *Emerg Med Int*  
13  
14 2017;2017:6978256. doi: 10.1155/2017/6978256.  
15  
16
- 17 20. Lancee WJ, Maunder RG, Goldbloom DS. Prevalence of psychiatric disorders among  
18  
19 Toronto hospital workers one to two years after SARS outbreak. *Psychiatr*  
20  
21 *Serv* 2008;59(1):91–5.  
22  
23
- 24 21. Maunder RG, Lancee WJ, Balderson KE, et al. Long term psychological and occupational  
25  
26 effects of providing hospital health care during SARS outbreak. *Emerg Infect*  
27  
28 *Dis* 2006;12(12):1924–32.  
29  
30
- 31 22. Lai J, Ma S, Wang Y, et al., Factors associated with mental health outcomes among health  
32  
33 care workers exposed to coronavirus disease 2019. *JAMA Network Open* 2020;3(3):e203976.  
34  
35
- 36 23. Wilder-Smith A, Chiew CJ, Lee VJ. Can we contain the COVID-19 outbreak with the same  
37  
38 measures as for SARS? *Lancet Infect Dis* 2020;20(5):e102-7. doi: 10.1016/S1473-  
39  
40 3099(20)30129-8.  
41  
42
- 43 24. Matrajt L, Leung T. Evaluating the effectiveness of social distancing interventions to delay  
44  
45 or flatten the epidemic curve of coronavirus disease. *Emerg Infect Dis* 2020;26(8) published  
46  
47 online April 28. doi: 10.3201/eid2608.201093.  
48  
49
- 50 25. Mahler J. Epicenter: inside the underfunded, overwhelmed public hospitals that are trying to  
51  
52 save New York. *The New York Times Magazine*, April 19, 2020:24-51.  
53  
54  
55  
56  
57  
58  
59  
60

- 1  
2  
3 26. Kim CS, Lynch JB, Cohen S et al. One academic health system's early (and ongoing)  
4  
5 experience responding to COVID-19: recommendations from the initial epicenter of the  
6  
7 pandemic in the United States. *Acad Med* 2020; published online April 9.  
8  
9 [10.1097/ACM.0000000000003410](https://doi.org/10.1097/ACM.0000000000003410)  
10  
11  
12 27. Bronfenbrenner U. The ecology of human development. Cambridge MA: Harvard University  
13  
14 Press, 1979.  
15  
16 28. Moore M, Cristofalo M, Dotolo D, et al. When high pressure, system constraints, and a social  
17  
18 justice mission collide: a socio-structural analysis of emergency department social work  
19  
20 services. *Soc Sci Med* 2017;178:104-14.  
21  
22  
23 29. Scheuer H, Engstrom A, Thomas P, et al. A comparative effectiveness trial of an  
24  
25 information technology enhanced peer-integrated collaborative care intervention versus  
26  
27 enhanced usual care for US trauma care systems: clinical study protocol. *Contemp Clin*  
28  
29 *Trials* 2020;91(105970). <https://doi.org/10.1016/j.cct.2020.105970>  
30  
31  
32 30. Palinkas LA, Zatzick D. Rapid assessment procedure informed clinical ethnography  
33  
34 (RAPICE) in Pragmatic clinical trials of mental health services implementation: methods and  
35  
36 applied case study. *Admin Policy Ment Health* 2019;46:255-70.  
37  
38  
39 31. Moloney K, Scheuer H, Engstrom A, et al. Experiences and insights from the early US  
40  
41 COVID-19 epicenter: a rapid assessment procedure informed clinical ethnography case  
42  
43 series. *Psychiatry* 2020, in press.  
44  
45  
46 32. Palinkas LA, Prussing E, Reznik VM, Landsverk J. The San Diego East County school  
47  
48 shootings: a qualitative study of community-level post-traumatic stress. *Prehosp Disaster*  
49  
50 *Med* 2004;19(1):113-21.  
51  
52  
53  
54  
55  
56  
57  
58  
59  
60

- 1  
2  
3 33. Zatzick D, Coq N, Frederic J, et al. Psychosocial support training for HIV health care  
4 providers in response to the Haitian earthquake. Consortium of Universities for Global  
5 Health Annual Meeting, University of Washington, Seattle, WA., 2010.  
6  
7  
8  
9  
10 34. HCPro. Case study: Harborview Medical Center's automated sepsis alert system. Nurse  
11 Leader Insider Sept 6, 2018. [https://www.hcpro.com/NRS-331768-868/Case-Study-](https://www.hcpro.com/NRS-331768-868/Case-Study-Harborview-Medical-Centers-Automated-Sepsis-Alert-System.html)  
12 [Harborview-Medical-Centers-Automated-Sepsis-Alert-System.html](https://www.hcpro.com/NRS-331768-868/Case-Study-Harborview-Medical-Centers-Automated-Sepsis-Alert-System.html). (Accessed June 9,  
13 2020).  
14  
15  
16  
17  
18  
19 35. Miller WL, Crabtree BF. Primary care research: a multimethod typology and qualitative road  
20 map. In: Crabtree BF, Miller WL, eds. Doing qualitative research. Newbury Park, CA: Sage;  
21 1992:3-30.  
22  
23  
24  
25  
26 36. Saldana J. The coding manual for qualitative researchers, 3rd ed. Los Angeles: Sage; 2016.  
27  
28 37. Chen Q, Liang M, Li Y, et al. Mental health care for medical staff in China during the  
29 COVID-19 outbreak. *Lancet Psychiatry* 2020 Apr;7(4):e15-e16. doi: 10.1016/S2215-  
30 0366(20)30078-X.  
31  
32  
33  
34  
35 38. Barello S, Palamenghi L, Graffigna G. Burnout and somatic symptoms among frontline  
36 healthcare professionals at the peak of the Italian COVID-19 pandemic. *Psychiatry Res*  
37 2020;290:113129. <https://doi.org/10.1016/j.psychres.2020.113129>  
38  
39  
40  
41  
42 39. Shanafelt T, Ripp J, Trockel M. Understanding and addressing sources of anxiety among  
43 health care professionals during the COVID-19 pandemic. *JAMA* 2020; published online  
44 April 7. doi:10.1001/jama.2020.5893.  
45  
46  
47  
48  
49  
50  
51  
52  
53  
54  
55  
56  
57  
58  
59  
60



**Table 1. Impacts of COVID-19 pandemic on clinical procedures**

| Subtheme                             | Level | Illustrative quote                                                                                                                                                                                                                                                                                                                                                                                                                                                                                                                                                                                                                                                                                                                                                                                                                            |
|--------------------------------------|-------|-----------------------------------------------------------------------------------------------------------------------------------------------------------------------------------------------------------------------------------------------------------------------------------------------------------------------------------------------------------------------------------------------------------------------------------------------------------------------------------------------------------------------------------------------------------------------------------------------------------------------------------------------------------------------------------------------------------------------------------------------------------------------------------------------------------------------------------------------|
| <b>COVID testing</b>                 |       |                                                                                                                                                                                                                                                                                                                                                                                                                                                                                                                                                                                                                                                                                                                                                                                                                                               |
| Delay in care                        | 1,3   | <i>Any trauma who is intubated (which is most of our sick trauma patients) is considered COVID positive coming in and we have to perform the initial resuscitation and evaluation in airborne precautions and limit people/supplies in the room. This can sometimes cause a delay in some of the care.</i>                                                                                                                                                                                                                                                                                                                                                                                                                                                                                                                                    |
| Impact on quality of care            | 1,2,3 | <i>... sometimes patients have you know what normally we would consider to be relatively urgent things and we would just get the patient down to the OR quickly because there is the potential for them to decompensate. They might not be dying in front of you, but there is the potential for them to decompensate. And that sort of decision of like 'hey should we like in this situation to preserve PPE, like get this COVID test and wait because we think the patient's kind of going to be able to make it a few hours without decompensating,' that I find kind of challenging because it feels like you're sometimes providing maybe not the best care because normally you would go straight down to the operating room but there's also all these layers of if I do that, you know it uses this much more PPE and what not.</i> |
| Guideline uncertainty                | 1,3,4 | <i>Constantly evolving pathways for COVID testing and clearance which is understandable but no clear consensus on a day to day basis, or at least a lot of confusion.</i>                                                                                                                                                                                                                                                                                                                                                                                                                                                                                                                                                                                                                                                                     |
| <b>Social distancing</b>             |       |                                                                                                                                                                                                                                                                                                                                                                                                                                                                                                                                                                                                                                                                                                                                                                                                                                               |
| Impact on procedures                 | 1,3   | <i>I think, you know, we're a teaching hospital so anything that happens, anything that happened, I should say in the past, happened with a large group of people. You know there's the people who are performing the task and then the observers who are learning. The observers are no longer present for any of that. And even the activities that are being provided have been rethought to a point where we can pare them down to just the minimum number required. And so, so yes absolutely. There's a significant amount of workflow changes that occurred to minimize the numbers of people that are involved.</i>                                                                                                                                                                                                                   |
| Reducing patient need to visit ED    | 1,2,3 | <i>Worked with patient to avoid ER a few weeks ago after a fall by coordinating nurse &amp; doctor phone call; resulted in patient creating sling and icing injury. Resolved without visit to ER. Pt needs to go to doctor &amp; physical therapy often for pain management and routine care for chronic conditions. Clinics do not want her coming in because not "absolutely necessary."</i>                                                                                                                                                                                                                                                                                                                                                                                                                                                |
| Impacts on provider interactions     | 1,3,4 | <i>Also, we note the geography of our ED has changed so keep &gt; 6 feet of space between patients and allow for providers in patient care areas, so providers no longer congregate together in non-clinical spaces and sit separate from nurses which decreases clinical communication. There were no bad outcomes, just notable how much harder it is to communicate as a whole clinical team.</i>                                                                                                                                                                                                                                                                                                                                                                                                                                          |
| Reduced presence of family members   | 1,3,4 | <i>And then I really think one of the biggest things that's been sort of hard I think for us as a group and I think for all healthcare providers sort of who are taking care of any patient, COVID positive or not, is that, is the fact that you know we really aren't able to have family members in the hospital almost at all, which is a very different way than we usually practice. And that's been really hard I think on everyone in sort of the hospital but also the patients and their families.</i>                                                                                                                                                                                                                                                                                                                              |
| Use of telehealth                    | 1,3,4 | <i>Before, when all this started we were not set up for telehealth in anyway, we did do phone calls that's always been something but it was seen as only, we only did that if there was some really extenuating circumstances, or if something was so minor that it just seemed better to do it over phone. So as soon as really drastic measures were being taken place to call patients like "do you really need this, or can you wait until June". You know things started to be more and more integrated into the telehealth way and Zoom was being used.</i>                                                                                                                                                                                                                                                                             |
| Impact on quality of care            | 3,4   | <i>One of the patients who has a lot of chronic illnesses ..., he self-identified as someone whose not a phone person and is, notices himself that as engaged as much and getting distracted over the phone, and just is the kind of person that favors in person contact for a variety of reasons. And so, it really inhibited our work together and that he is less able to get into to a state of readiness to do therapeutic work because he's just distracted and then generally seeming feeling a lot more hopeless.</i>                                                                                                                                                                                                                                                                                                                |
| <b>Use of PPE</b>                    |       |                                                                                                                                                                                                                                                                                                                                                                                                                                                                                                                                                                                                                                                                                                                                                                                                                                               |
| Impacts on procedures                | 1,3   | <i>It also limits our ability, like we as the attendings don't go into the room. We sort of stand back, not in airborne, N-95 precautions, we sort of stand back to preserve PPE because we usually don't, you know we're not usually the ones like doing stuff to the patient</i>                                                                                                                                                                                                                                                                                                                                                                                                                                                                                                                                                            |
| Impact on interactions with patients | 3,4   | <i>I think that some people do feel apprehensive that they can't see your face but also that you know you may be a risk to them, and sort of I feel like sometimes sends that signal even though you're trying to obviously do the right thing and protect them. I mean classically people have worn masks in hospitals when they have been sick, right? I mean that's why we've worn masks, is if you have like a runny nose or a cough or something. Just as an extra layer of protection. So, it's always been like oh stay away from that person with the mask on because they're you know sick.</i>                                                                                                                                                                                                                                      |
| Challenges in wearing                | 3,4   | <i>I don't know if you've seen these masks, I mean you know, we have the tie masks, they're impossible, like you can't wear them all day and getting them on and off, I got a bunch somewhere, but they're hard to tie, so you're thinking about how to sterilize them, and the, they're tie masks they're not like, they used to have better ear masks but they are conserving those for the patients, those stay on, these, these don't unless you're really good at tying them.</i>                                                                                                                                                                                                                                                                                                                                                        |

**Table 2. Impacts of COVID-19 pandemic on health care providers**

| Subtheme                               | Level | Illustrative quote                                                                                                                                                                                                                                                                                                                                                                                                                                                                                                                                                                                                                                                                                                                                                                                                                                                                                                                                                                                                                                                                 |
|----------------------------------------|-------|------------------------------------------------------------------------------------------------------------------------------------------------------------------------------------------------------------------------------------------------------------------------------------------------------------------------------------------------------------------------------------------------------------------------------------------------------------------------------------------------------------------------------------------------------------------------------------------------------------------------------------------------------------------------------------------------------------------------------------------------------------------------------------------------------------------------------------------------------------------------------------------------------------------------------------------------------------------------------------------------------------------------------------------------------------------------------------|
| <b>Risk of infection</b>               |       | <i>...the kind of thing that would really be unexpected and really upsetting is to having evaluated a patient, for instance, this week who was negative and then they [tested positive], and for all of us to hear about that and then have to worry about that or even, you know, those are, those are the kinds of things.</i>                                                                                                                                                                                                                                                                                                                                                                                                                                                                                                                                                                                                                                                                                                                                                   |
| <b>Negative impacts</b>                |       |                                                                                                                                                                                                                                                                                                                                                                                                                                                                                                                                                                                                                                                                                                                                                                                                                                                                                                                                                                                                                                                                                    |
| Anxiety                                |       | <i>I mean there's a fair bit of anxiety, for sure. I think with regards to, you know exposure, family, sort of uncertainty. And just like trying to do the best you can in a different sort of world, if you want to call it that, with the COVID sort of being the primary thing that comes up every step of the way. Like sometimes you're standing there and you're like oh my God this patient is bleeding to death, can we stop talking about the COVID? You know but its something that we're just having, having to talk about. I think, I think that the anxiety part.</i>                                                                                                                                                                                                                                                                                                                                                                                                                                                                                                 |
| Depression                             |       | <i>It's been sad, just the effect that this has had on these 2 patients in particular. One because I feel like that for months and months and months, we've been working together to get out more and to spend more time doing things, but, you know, give them a sense of purpose or satisfaction. It almost hurts them that much more, you know they've been working towards it, both of them had achieved the task of getting out more, so just as they were starting to get it together and like "oh this like really does work and this is really helping" and seeing some improvement and symptoms, and then it being taken away from them is pretty earth shattering.</i>                                                                                                                                                                                                                                                                                                                                                                                                   |
| Stress                                 |       | <i>There are providers that are stressed. I mean, it's the COVID-19 stress, it's the daycare stress, unemployment stress, kids not getting jobs. It's a whole morass, as you probably already know. things that are happening to people.</i>                                                                                                                                                                                                                                                                                                                                                                                                                                                                                                                                                                                                                                                                                                                                                                                                                                       |
| Guilt                                  |       | <i>Yeah, and I think people feel conflicted that you get to go to work and see your friends and so you get to have those at work and you get to have a conversation with adult friends in person and a lot of people don't get to do that anymore. And that sounds fun... I think there's also this is little bit of guilt in I know I told you that [the hospital] is not seeing this deluge of patients and you know, the community, the restaurants are giving out free lunch and local celebrities... have dropped off some food or some free thing to healthcare workers... and you're sort of like well actually we aren't seeing that many patients right now with COVID-19.</i>                                                                                                                                                                                                                                                                                                                                                                                            |
| Ethical conflicts                      |       | <i>I think one of the early discussions we had...we have a program here where we use ECMO for respiratory failure. And one of the early discussions we had here with not just the hospital..., but also with other ECMO centers throughout the Pacific Northwest was what are we going to do in the anticipation of this surge of patients? Does it make sense to utilize a very high resource, you know procedure, for a very, very small number of patients, where a lot of PPE is going to be used and a lot of dedication, a lot of dedicated staff. And at that time, we kind of made the decision that we, that we wouldn't...that did not make sense. That we wouldn't offer that service. As it started to unfold, that, you know the surge that we were anticipating didn't develop quite in the way that we thought it would or we feared that it would, we then kind of, as a group, reinstated the procedure and recognizing that, well it seems like we do have the capacity both in terms of staff and space and with PPE and equipment to provide that service.</i> |
| Social tension                         |       | <i>My colleague that's been here for 15 years, she's great. At the end [of our shift] as we were saying goodbye to her, she asks me to tell her everything you've learned [from this study]. She's pushing me; she said "okay [name removed], so why do you get to do this research? That's a pretty privileged thing to do and then why don't you come here [to treat patients], I'm doing this yes you know, and you know it's also like we need people."</i>                                                                                                                                                                                                                                                                                                                                                                                                                                                                                                                                                                                                                    |
| <b>Coping strategies and resources</b> |       |                                                                                                                                                                                                                                                                                                                                                                                                                                                                                                                                                                                                                                                                                                                                                                                                                                                                                                                                                                                                                                                                                    |
| Procedural innovations                 |       | <i>We want to make sure that our outpatients clinic and providers are safe and patients with COVID go to outpatient units and so it's an important workaround but for patients that will have trouble with Telemedicine and Telehealth, it does feel like the emergency department is now not only a safety net but it's sort of the end of the road for a lot of people</i>                                                                                                                                                                                                                                                                                                                                                                                                                                                                                                                                                                                                                                                                                                       |
| Prevention                             | 1,3,4 | <i>I think most people including myself are going home and just showering and then you know washing the clothes that they were wearing to and from the hospital. And everyone at the hospital has moved to where its just wearing scrubs as soon as they come in.</i>                                                                                                                                                                                                                                                                                                                                                                                                                                                                                                                                                                                                                                                                                                                                                                                                              |
| Social support                         | 3,4   | <i>The community very much wanted to contribute whatever they could to recognize the work that healthcare is providing for the communities, which has been wonderful. But we want to make sure that information makes it to staff as well.</i>                                                                                                                                                                                                                                                                                                                                                                                                                                                                                                                                                                                                                                                                                                                                                                                                                                     |
| Mental health services                 | 3,4   | <i>The university had this drop-in session of talk about your concerns and one of my colleagues dropped in and he said that he is saw every healthcare worker has sort of their own piece of the thing that's making their life harder and what he would be most helpful emergency medicine doctors talking about what makes emergency medicine. So, we kind of developed our own faculty we just had like drop-ins in zoom meetings where you could go in and it was free from judgement and you could talk about whatever you needed to talk about. I think a lot of people found those to be helpful and I dropped in a couple times especially kind of early on.</i>                                                                                                                                                                                                                                                                                                                                                                                                           |
| Information                            | 3,4   | <i>I think knowledge has helped already a lot. In the beginning, again there was so little known about, even the, how the disease was transmitted was very, very little was known in the beginning. There's still some question in that, you know what is considered safe what's not considered safe. What procedures can we perform using this type of PPE versus that type of PPE. I think when staff understand everything that there is to know about a given, you know disease transmission and process, then that makes them a little more comfortable.</i>                                                                                                                                                                                                                                                                                                                                                                                                                                                                                                                  |
| Self-care                              | 1,3,4 | <i>I think, I think for me what made the difference is being very purposeful with what I've been doing with my time, and I think for the vast majority of humans and provides, we create a system of coping for ourselves and when those traditional means are getting thwarted or changed, we have to find a good replacement for that. And I think that, yeah, being purposeful that how you're spending your time and customizing it to your needs and what gets you through is important. But I also think that means having the boundaries between work and personal life so</i>                                                                                                                                                                                                                                                                                                                                                                                                                                                                                              |

1  
2  
3  
4  
5  
6  
7  
8  
9  
10  
11  
12  
13  
14  
15  
16  
17  
18  
19  
20  
21  
22  
23  
24  
25  
26  
27  
28  
29  
30  
31  
32  
33  
34  
35  
36  
37  
38  
39  
40  
41  
42  
43  
44  
45  
46  
47  
48  
49  
50  
51  
52  
53  
54  
55  
56  
57  
58  
59  
60

|  |  |                                                                                                                                   |
|--|--|-----------------------------------------------------------------------------------------------------------------------------------|
|  |  | <i>that you have the time to, one, think about what you need to do to get yourself through, and two, actually do those things</i> |
|--|--|-----------------------------------------------------------------------------------------------------------------------------------|

For peer review only

**Table 3. Impacts of COVID-19 pandemic on patients**

| Subtheme                   | Level | Illustrative quote                                                                                                                                                                                                                                                                                                                                                                                                                                                                                                                                                                                                                                                                                                                                                                                                                                                                                                           |
|----------------------------|-------|------------------------------------------------------------------------------------------------------------------------------------------------------------------------------------------------------------------------------------------------------------------------------------------------------------------------------------------------------------------------------------------------------------------------------------------------------------------------------------------------------------------------------------------------------------------------------------------------------------------------------------------------------------------------------------------------------------------------------------------------------------------------------------------------------------------------------------------------------------------------------------------------------------------------------|
| <b>Access to care</b>      | 2,3,4 | <i>Also, transitions for people seeking treatment have been difficult. Our detox center for alcohol detox treatment now requires negative COVID testing. Our outpatient based opioid treatment program partner now only utilizes phone appointments. Many community mental health programs are no longer accepting walk-ins. I'm hopeful this will change, but service access for patients with SUD [substance use disorder] is really difficult right now.</i>                                                                                                                                                                                                                                                                                                                                                                                                                                                              |
| <b>Fear of infection</b>   | 2,3,4 | <i>There's a lot of patients that are being fully recognized by the ED now and it's risky for them. They don't want to be there, I mean, they are there because they're having something unrelated to covid-19, chest pain for example. Where they want emergency evaluation and they need one. But they fully realize that as the minutes tick, they perceive just being in the ER is risky and so they are anxious about that. A lot of questions like, "do I really need to do that? Can I just go? When is this test going to be done? Can I get this as an outpatient?"</i>                                                                                                                                                                                                                                                                                                                                             |
| <b>Presenting problems</b> | 2,3,4 | <i>We have not been as busy from a trauma perspective, although the last couple weeks have been picking up as people, I think, are getting a little more antsy with the social distancing and things. We've certainly seen a lot, like a lot more, or it seems like more at least of the self-harm and non-accidental type of traumas, which has been challenge in and of itself. And then on the general surgery side it seems like people with like normal problems like appendicitis and you know infected gallbladders are coming in later than the otherwise would I think out of concern for, you know, being in the hospital if they don't need to be which is a valid concern.</i>                                                                                                                                                                                                                                   |
| <b>Risk disparities</b>    | 1,2,4 | <i>One thing that I have noticed in taking care of patients with COVID-19 how many people with covid-19 have a lot of vulnerabilities in the social determinants of health that kind of layer on that person's ability to manage their assets. And so, the number of patients non-English-speaking is 75% of the patients that I have seen with COVID-19 English-speaking. Either service sector uninsured or underinsured with little access to ability to physically distance at home or multi-generational living where the mom works but she has a baby and Grandma takes care of the baby during the day and how do you take care of a baby and older parent? How do you reconcile that in a two-bedroom condo 1 bathroom when someone take public transportation and so I just been struck with the fact that this is going to take a huge toll on people color on the Spanish-speaking people who are immigrants?</i> |

**Table 4. Overall impacts of COVID-19 pandemic on service delivery**

| Subtheme                         | Level | Illustrative quote                                                                                                                                                                                                                                                                                                                                                                                                                                                                                                                                                                                                                                                                                                                                                       |
|----------------------------------|-------|--------------------------------------------------------------------------------------------------------------------------------------------------------------------------------------------------------------------------------------------------------------------------------------------------------------------------------------------------------------------------------------------------------------------------------------------------------------------------------------------------------------------------------------------------------------------------------------------------------------------------------------------------------------------------------------------------------------------------------------------------------------------------|
| <b>Fewer cases than expected</b> | 1,2   | <i>Yeah, so we, you know we did prep for a much larger surge based on the initial predictions for Washington than we ended up having. I think as a result of pretty aggressive social distancing and stay at home orders, which if you look at them, the series of prediction sort of the surge got less and less.</i>                                                                                                                                                                                                                                                                                                                                                                                                                                                   |
| <b>System was prepared</b>       | 2,3   | <i>At Harborview though, you know, we received patients from that event. It was not, it did not overwhelm us. We then, you know that sort of triggered the overall, sort of regional, you know, incident response structure that is in place today. And as we started to prepare for the surge, we were able to very easily keep up with the inflow of patients. And so, at this point the workload...you know people are still very much able to get their time off. The workload is, I mean there's work to be done but it's not overwhelming. And so, I think from that standpoint, we haven't seen the fatigue, the long hours, the multiple days, that you might see where, you know, kind of the picture that's being described in the, in New York right now.</i> |
| Supplies were adequate           | 2,3   | <i>So, so the provider saw the 20 patients on the unit. And you know got ample googles, masks and gloves on the unit from the nursing staff.</i>                                                                                                                                                                                                                                                                                                                                                                                                                                                                                                                                                                                                                         |
| High staff morale                | 3,4   | <i>So, it's definitely, it's definitely something on people's minds. But does it affect the day-to-day performance? I have not seen that. People are absolutely willing to step in and do the work.</i>                                                                                                                                                                                                                                                                                                                                                                                                                                                                                                                                                                  |

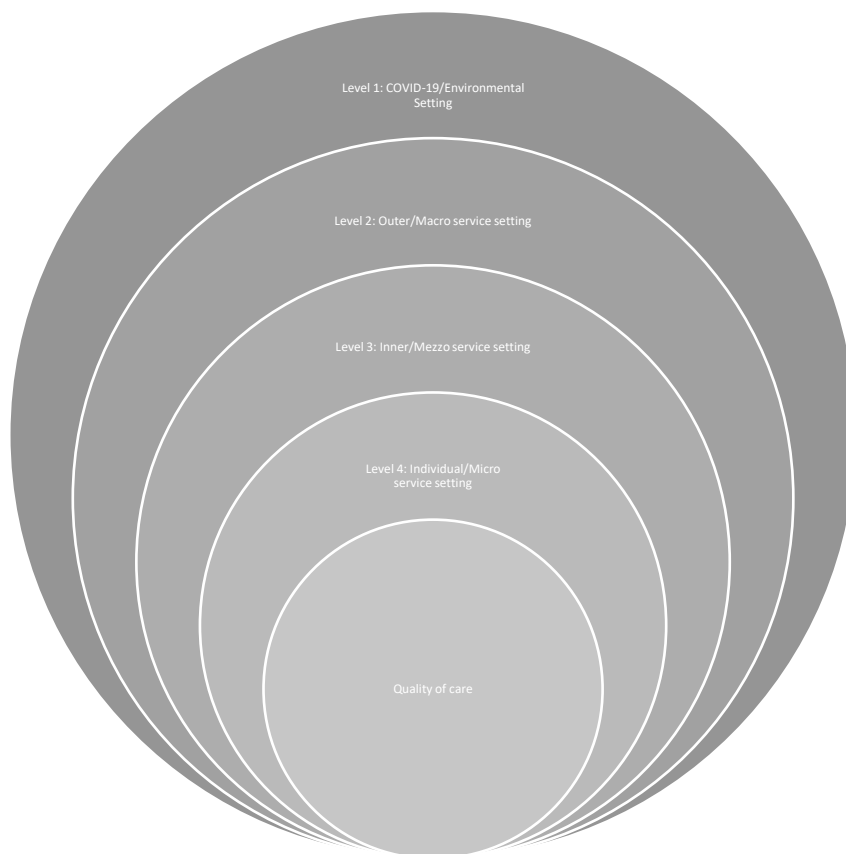

Level 1: COVID-19/Environmental Setting

Level 2: Outer/Macro service setting

Level 3: Inner/Mezzo service setting

Level 4: Individual/Micro service setting

Quality of care

Review only

1  
2  
3  
4  
5  
6  
7  
8  
9  
10  
11  
12  
13  
14  
15  
16  
17  
18  
19  
20  
21  
22  
23  
24  
25  
26  
27  
28  
29  
30  
31  
32  
33  
34  
35  
36  
37  
38  
39  
40  
41  
42  
43  
44  
45  
46  
47  
48  
49  
50  
51  
52  
53  
54  
55  
56  
57  
58  
59  
60

## Standards for Reporting Qualitative Research (SRQR)\*

<http://www.equator-network.org/reporting-guidelines/srqr/>

Page/line no(s).

### Title and abstract

|                                                                                                                                                                                                                                                              |     |
|--------------------------------------------------------------------------------------------------------------------------------------------------------------------------------------------------------------------------------------------------------------|-----|
| <p><b>Title</b> - Concise description of the nature and topic of the study Identifying the study as qualitative or indicating the approach (e.g., ethnography, grounded theory) or data collection methods (e.g., interview, focus group) is recommended</p> | 1   |
| <p><b>Abstract</b> - Summary of key elements of the study using the abstract format of the intended publication; typically includes background, purpose, methods, results, and conclusions</p>                                                               | 3-4 |

### Introduction

|                                                                                                                                                                     |     |
|---------------------------------------------------------------------------------------------------------------------------------------------------------------------|-----|
| <p><b>Problem formulation</b> - Description and significance of the problem/phenomenon studied; review of relevant theory and empirical work; problem statement</p> | 6-8 |
| <p><b>Purpose or research question</b> - Purpose of the study and specific objectives or questions</p>                                                              | 8   |

### Methods

|                                                                                                                                                                                                                                                                                                                                                                                                             |      |
|-------------------------------------------------------------------------------------------------------------------------------------------------------------------------------------------------------------------------------------------------------------------------------------------------------------------------------------------------------------------------------------------------------------|------|
| <p><b>Qualitative approach and research paradigm</b> - Qualitative approach (e.g., ethnography, grounded theory, case study, phenomenology, narrative research) and guiding theory if appropriate; identifying the research paradigm (e.g., postpositivist, constructivist/ interpretivist) is also recommended; rationale**</p>                                                                            | 8-9  |
| <p><b>Researcher characteristics and reflexivity</b> - Researchers' characteristics that may influence the research, including personal attributes, qualifications/experience, relationship with participants, assumptions, and/or presuppositions; potential or actual interaction between researchers' characteristics and the research questions, approach, methods, results, and/or transferability</p> | 9-11 |
| <p><b>Context</b> - Setting/site and salient contextual factors; rationale**</p>                                                                                                                                                                                                                                                                                                                            | 9    |
| <p><b>Sampling strategy</b> - How and why research participants, documents, or events were selected; criteria for deciding when no further sampling was necessary (e.g., sampling saturation); rationale**</p>                                                                                                                                                                                              | 9    |
| <p><b>Ethical issues pertaining to human subjects</b> - Documentation of approval by an appropriate ethics review board and participant consent, or explanation for lack thereof; other confidentiality and data security issues</p>                                                                                                                                                                        | 9-10 |
| <p><b>Data collection methods</b> - Types of data collected; details of data collection procedures including (as appropriate) start and stop dates of data collection and analysis, iterative process, triangulation of sources/methods, and modification of procedures in response to evolving study findings; rationale**</p>                                                                             | 10   |



|                       |                                                                                                                                                                                                                                                       |       |
|-----------------------|-------------------------------------------------------------------------------------------------------------------------------------------------------------------------------------------------------------------------------------------------------|-------|
| 1<br>2<br>3<br>4<br>5 | <b>Data collection instruments and technologies</b> - Description of instruments (e.g., interview guides, questionnaires) and devices (e.g., audio recorders) used for data collection; if/how the instrument(s) changed over the course of the study | 10    |
| 6<br>7<br>8           | <b>Units of study</b> - Number and relevant characteristics of participants, documents, or events included in the study; level of participation (could be reported in results)                                                                        | 9     |
| 9<br>10<br>11<br>12   | <b>Data processing</b> - Methods for processing data prior to and during analysis, including transcription, data entry, data management and security, verification of data integrity, data coding, and anonymization/de-identification of excerpts    | 10-11 |
| 13<br>14<br>15<br>16  | <b>Data analysis</b> - Process by which inferences, themes, etc., were identified and developed, including the researchers involved in data analysis; usually references a specific paradigm or approach; rationale**                                 | 10-11 |
| 17<br>18<br>19<br>20  | <b>Techniques to enhance trustworthiness</b> - Techniques to enhance trustworthiness and credibility of data analysis (e.g., member checking, audit trail, triangulation); rationale**                                                                | 10-11 |

### Results/findings

|                      |                                                                                                                                                                                                   |            |
|----------------------|---------------------------------------------------------------------------------------------------------------------------------------------------------------------------------------------------|------------|
| 23<br>24<br>25<br>26 | <b>Synthesis and interpretation</b> - Main findings (e.g., interpretations, inferences, and themes); might include development of a theory or model, or integration with prior research or theory | 11-19      |
| 27<br>28<br>29       | <b>Links to empirical data</b> - Evidence (e.g., quotes, field notes, text excerpts, photographs) to substantiate analytic findings                                                               | tables 1-4 |

### Discussion

|                                  |                                                                                                                                                                                                                                                                                                                                                                                                             |       |
|----------------------------------|-------------------------------------------------------------------------------------------------------------------------------------------------------------------------------------------------------------------------------------------------------------------------------------------------------------------------------------------------------------------------------------------------------------|-------|
| 32<br>33<br>34<br>35<br>36<br>37 | <b>Integration with prior work, implications, transferability, and contribution(s) to the field</b> - Short summary of main findings; explanation of how findings and conclusions connect to, support, elaborate on, or challenge conclusions of earlier scholarship; discussion of scope of application/generalizability; identification of unique contribution(s) to scholarship in a discipline or field | 19-22 |
| 38<br>39                         | <b>Limitations</b> - Trustworthiness and limitations of findings                                                                                                                                                                                                                                                                                                                                            | 20-22 |

### Other

|                |                                                                                                                                               |       |
|----------------|-----------------------------------------------------------------------------------------------------------------------------------------------|-------|
| 42<br>43<br>44 | <b>Conflicts of interest</b> - Potential sources of influence or perceived influence on study conduct and conclusions; how these were managed | 24    |
| 45<br>46       | <b>Funding</b> - Sources of funding and other support; role of funders in data collection, interpretation, and reporting                      | 23-24 |

\*The authors created the SRQR by searching the literature to identify guidelines, reporting standards, and critical appraisal criteria for qualitative research; reviewing the reference lists of retrieved sources; and contacting experts to gain feedback. The SRQR aims to improve the transparency of all aspects of qualitative research by providing clear standards for reporting qualitative research.



1  
2  
3  
4  
5  
6  
7  
8  
9  
10  
11  
12  
13  
14  
15  
16  
17  
18  
19  
20  
21  
22  
23  
24  
25  
26  
27  
28  
29  
30  
31  
32  
33  
34  
35  
36  
37  
38  
39  
40  
41  
42  
43  
44  
45  
46  
47  
48  
49  
50  
51  
52  
53  
54  
55  
56  
57  
58  
59  
60

\*\*The rationale should briefly discuss the justification for choosing that theory, approach, method, or technique rather than other options available, the assumptions and limitations implicit in those choices, and how those choices influence study conclusions and transferability. As appropriate, the rationale for several items might be discussed together.

**Reference:**

O'Brien BC, Harris IB, Beckman TJ, Reed DA, Cook DA. **Standards for reporting qualitative research: a synthesis of recommendations.** *Academic Medicine*, Vol. 89, No. 9 / Sept 2014  
DOI: 10.1097/ACM.0000000000000388

For peer review only

# BMJ Open

## A Rapid Ethnographic Assessment of the COVID-19 Pandemic April 2020 "Surge" and its Impact on Service Delivery in an Acute Care Medical Emergency Department and Trauma Center

|                                 |                                                                                                                                                                                                                                                                                                                                                                                                                                                                                                                                                                                                                                                                               |
|---------------------------------|-------------------------------------------------------------------------------------------------------------------------------------------------------------------------------------------------------------------------------------------------------------------------------------------------------------------------------------------------------------------------------------------------------------------------------------------------------------------------------------------------------------------------------------------------------------------------------------------------------------------------------------------------------------------------------|
| Journal:                        | <i>BMJ Open</i>                                                                                                                                                                                                                                                                                                                                                                                                                                                                                                                                                                                                                                                               |
| Manuscript ID                   | bmjopen-2020-041772.R1                                                                                                                                                                                                                                                                                                                                                                                                                                                                                                                                                                                                                                                        |
| Article Type:                   | Original research                                                                                                                                                                                                                                                                                                                                                                                                                                                                                                                                                                                                                                                             |
| Date Submitted by the Author:   | 03-Sep-2020                                                                                                                                                                                                                                                                                                                                                                                                                                                                                                                                                                                                                                                                   |
| Complete List of Authors:       | Palinkas, Lawrence A.; University of Southern California, Suzanne Dworak-Peck School of Social Work<br>Whiteside, Lauren ; University of Washington School of Medicine, Emergency Medicine<br>Nehra, Deepika; University of Washington School of Medicine, Surgery<br>Engstrom, Allison ; University of Washington School of Medicine, Psychiatry & Behavioral Sciences<br>Taylor, Mark; Harborview Medical Center, Division of Trauma, Burn and Critical Care Surgery<br>Moloney, Kathleen; University of Washington School of Medicine, Psychiatry & Behavioral Sciences<br>Zatzick, Douglas; University of Washington School of Medicine, Psychiatry & Behavioral Sciences |
| <b>Primary Subject Heading</b>: | Emergency medicine                                                                                                                                                                                                                                                                                                                                                                                                                                                                                                                                                                                                                                                            |
| Secondary Subject Heading:      | Surgery, Mental health                                                                                                                                                                                                                                                                                                                                                                                                                                                                                                                                                                                                                                                        |
| Keywords:                       | ACCIDENT & EMERGENCY MEDICINE, ORTHOPAEDIC & TRAUMA SURGERY, INFECTIOUS DISEASES, Adult psychiatry < PSYCHIATRY, Public health < INFECTIOUS DISEASES, Trauma management < ORTHOPAEDIC & TRAUMA SURGERY                                                                                                                                                                                                                                                                                                                                                                                                                                                                        |
|                                 |                                                                                                                                                                                                                                                                                                                                                                                                                                                                                                                                                                                                                                                                               |

SCHOLARONE™  
Manuscripts



I, the Submitting Author has the right to grant and does grant on behalf of all authors of the Work (as defined in the below author licence), an exclusive licence and/or a non-exclusive licence for contributions from authors who are: i) UK Crown employees; ii) where BMJ has agreed a CC-BY licence shall apply, and/or iii) in accordance with the terms applicable for US Federal Government officers or employees acting as part of their official duties; on a worldwide, perpetual, irrevocable, royalty-free basis to BMJ Publishing Group Ltd ("BMJ") its licensees and where the relevant Journal is co-owned by BMJ to the co-owners of the Journal, to publish the Work in this journal and any other BMJ products and to exploit all rights, as set out in our [licence](#).

The Submitting Author accepts and understands that any supply made under these terms is made by BMJ to the Submitting Author unless you are acting as an employee on behalf of your employer or a postgraduate student of an affiliated institution which is paying any applicable article publishing charge ("APC") for Open Access articles. Where the Submitting Author wishes to make the Work available on an Open Access basis (and intends to pay the relevant APC), the terms of reuse of such Open Access shall be governed by a Creative Commons licence – details of these licences and which [Creative Commons](#) licence will apply to this Work are set out in our licence referred to above.

Other than as permitted in any relevant BMJ Author's Self Archiving Policies, I confirm this Work has not been accepted for publication elsewhere, is not being considered for publication elsewhere and does not duplicate material already published. I confirm all authors consent to publication of this Work and authorise the granting of this licence.

1  
2  
3 **A Rapid Ethnographic Assessment of the COVID-19 Pandemic April 2020 “Surge” and its**  
4 **Impact on Service Delivery in an Acute Care Medical Emergency Department and Trauma**  
5  
6 **Center**  
7  
8  
9

10  
11  
12 Lawrence A. Palinkas, Lauren Whiteside, Deepika Nehra, Allison Engstrom, Mark Taylor,  
13  
14 Kathleen Moloney, Douglas Zatzick  
15  
16

17  
18  
19 **Department of Children, Youth and Families, School of Social Work, University of**  
20 **Southern California, Los Angeles, CA, USA (Prof L Palinkas PhD, palinkas@usc.edu);**  
21  
22 **Department of Emergency Medicine, University of Washington School of Medicine, Seattle,**  
23 **WA, USA (L Whiteside MD, laurenkw@uw.edu); Department of Surgery, University of**  
24 **Washington School of Medicine, Seattle, WA, USA (D Nehra MD, deepikan@uw.edu);**  
25  
26 **Department of Psychiatry and Behavioral Sciences, University of Washington School of**  
27 **Medicine, Seattle, WA, USA (A Engstrom MSW, alliengs@uw.edu; K Moloney BA,**  
28 **kmoloney@uw.edu; Prof D Zatzick MD, dzatzick@uw.edu); Division of Trauma, Burn and**  
29 **Critical Care Surgery, Harborview Medical Center, Seattle, WA, USA (M Taylor RN);**  
30  
31 **Harborview Injury Prevention and Research Center, University of Washington School of**  
32 **Medicine, Seattle, WA, USA (L Whiteside MD, Prof D Zatzick MD)**  
33  
34  
35  
36  
37  
38  
39  
40  
41  
42  
43  
44

45  
46 Address Correspondence to: Lawrence A. Palinkas, Ph.D., Suzanne Dworak-Peck School of  
47  
48 Social Work, University of Southern California, 669 W. 34<sup>th</sup> Street, Los Angeles, CA 90089-  
49  
50 0411. Telephone 858-922-7265, FAX 213-740-0789, email Palinkas@usc.edu  
51

52  
53 <https://orcid.org/0000-0003-0974-7330>  
54  
55  
56  
57  
58  
59

## ABSTRACT

**Objectives:** Assess the impacts of the COVID-19 pandemic on service delivery by front-line health care providers in acute care medical and emergency department settings and identify strategies used to cope with pandemic-related physical and mental health demands.

**Design:** Rapid clinical ethnography of patient-provider encounters during an initial pandemic “surge” conducted by a team of clinician-researchers using a structured protocol for qualitative data collection and analysis.

**Setting:** Level 1 trauma center at Harborview Hospital in Seattle Washington in April 2020.

**Participants:** Front-line clinical providers serving as participant observers during performance of their clinical duties recorded observations and summaries of conversations with other providers and patients.

**Results:** We identified four different kinds of impacts: procedural, provider, patient, and overall. Each impact highlighted two or more levels of a socio-ecological model of services delivery: 1) the epidemiology of COVID-19, 2) outer setting, 3) inner or organizational setting, and 4) individual patient and provider. Despite significant changes in procedures that included COVID-19 screening of all admitted patients, social distancing and use of PPE, as well as changes in patient and provider behavior, the overall impact of the pandemic on the emergency department and acute care service delivery was minimal. This is attributed to having a smaller surge than expected, a quick response by the healthcare system to anticipated demands for service delivery and protection of patients and providers, adequate supplies, and high provider morale.

**Conclusions:** Although limited to one setting in one healthcare system in one community, the findings offer some important lessons for healthcare systems that have yet to be impacted as well as systems that have been more severely impacted. Each of the socio-ecological framework

1  
2  
3 levels were found to impact service delivery to patients, and variations at each of these levels  
4  
5 account for variations in that quality of care globally.  
6  
7  
8  
9  
10  
11  
12  
13  
14  
15  
16  
17  
18  
19  
20  
21  
22  
23  
24  
25  
26  
27  
28  
29  
30  
31  
32  
33  
34  
35  
36  
37  
38  
39  
40  
41  
42  
43  
44  
45  
46  
47  
48  
49  
50  
51  
52  
53  
54  
55  
56  
57  
58  
59  
60

## STRENGTHS AND LIMITATIONS OF THIS STUDY

- We conducted a rapid clinical ethnography of patient-provider encounters during an initial COVID-19 pandemic “surge” in Seattle Washington to assess the impacts on service delivery by front-line health care providers in acute care medical and emergency department settings and identify strategies used to cope with pandemic-related physical and mental health demands.
- The COVID-19 outbreak resulted in significant changes in acute care clinical procedures, the behaviors of patients and providers, and overall healthcare system performance that were influenced by four different levels of a socio-ecological model of service delivery at a healthcare system that was one of the first in the United States to be impacted by the pandemic.
- Providers reported widespread anxiety related to infection and transmission of COVID-19 to family members, along with depression related to perceived limitations to delivering care and stress related to the pandemic’s financial impacts and prolonged isolation and confinement.
- Providers also reported widespread use of coping strategies and resources to prevent disease spread and deliver high quality healthcare.
- Although limited to one setting in a single US healthcare system where the impacts associated with the pandemic have not been as severe to date as has been the case elsewhere, the findings also offer important lessons for healthcare system providers responding to the COVID-19 pandemic in other settings across the globe.

## INTRODUCTION

In January of 2020, the World Health Organization announced the emergence of a novel coronavirus (COVID-19) in Wuhan, China.<sup>1</sup> Since then, COVID-19 has become a global pandemic on a scale not seen since the 1918 influenza pandemic, which led to an estimated 50,000,000 deaths.<sup>2</sup> As of August 28, 2020, there were over 24.5 million confirmed cases of COVID-19 and 832,748 deaths across the globe; the United States is perhaps the most severely impacted nation with more than 5.8 million confirmed cases and 181,022 deaths.<sup>3</sup> In most states, all non-essential businesses and services were closed and employees were laid off or furloughed, resulting in a national unemployment rate of 14.7 percent in April 2020.<sup>4</sup> Social distancing and use of face masks, closure of non-essential businesses, and mandated quarantines and sheltering in place have been used to control the spread of the disease<sup>5</sup>

Along with other forms of natural disasters and acts of terrorism, infectious disease outbreaks or pandemics often result in a surge in demand for medical care, beginning with emergency departments (ED).<sup>6</sup> Health care systems generally plan responses to such surges by having a pandemic preparedness plan in place for triaging and caring for exposed patients. However, studies that have examined the impact of infectious disease outbreaks on service delivery have generally been retrospective and focused on patterns of admissions and discharges in EDs.<sup>6-8</sup> To date, there have been no studies conducted during a pandemic that have focused on the challenges to delivering acute care services and the extent to which these challenges were addressed by system policies and individual provider practices.

One of the potential influences of infectious disease outbreaks on service delivery in acute care settings is diminished performance due to stress and decrements in mental health. Burnout in health care professionals is frequently associated with poor-quality care.<sup>9,10</sup> Front-line



1  
2  
3 health care providers currently responding to the exponential increase in demands for care  
4  
5 associated with the COVID-19 pandemic share many of the same risk factors for adverse mental  
6  
7 health outcomes as those responding to other forms of disaster.<sup>6,11,12</sup> Several studies of infectious  
8  
9 disease outbreaks, including the 2003 SARS outbreaks in Asia and Canada and the 2012 MERS  
10  
11 outbreak in Saudi Arabia, have documented elevated levels of stress, anxiety, depression and  
12  
13 posttraumatic stress disorder,<sup>13-19</sup> which often persist years after the outbreak.<sup>20,21</sup> Lack of social  
14  
15 support and communication, maladaptive coping, and lack of training were important risk factors  
16  
17 for developing negative psychological outcomes across all types of disasters.  
18  
19  
20

21  
22 However, the current COVID-19 pandemic is unique in several respects. The number of  
23  
24 cases testing positive for the novel coronavirus and the number of hospital admissions and deaths  
25  
26 has exceeded that of previous respiratory disease pandemics, including SARS and MERS, and  
27  
28 differs from these pandemics in terms of infectious period, transmissibility, clinical severity, and  
29  
30 extent of community spread.<sup>22</sup> In an effort to “flatten the curve” of disease transmission,  
31  
32 morbidity and mortality, health care providers will be exposed for a longer period of time than is  
33  
34 the case in other pandemics<sup>23</sup> Front-line providers are confronting the possibility of becoming  
35  
36 infected themselves, thereby increasing the risk of coronavirus-related morbidity and mortality,  
37  
38 and preventive measures such as social distancing will likely impact both personal and  
39  
40 professional behaviors. A recently published investigation of mental health outcomes among  
41  
42 health care workers in Wuhan, China found that engagement in direct diagnosis, treatment and  
43  
44 care of patients with COVID-19 was associated with a higher risk of symptoms of depression,  
45  
46 anxiety, insomnia, and distress.<sup>24</sup> Although these features of the current pandemic have been  
47  
48 prominent in the news media,<sup>25</sup> to date, there have been no systematic studies of these impacts on  
49  
50 service delivery. Moreover, the focus of media attention has been on health care systems in  
51  
52  
53  
54  
55  
56  
57  
58  
59  
60

1  
2  
3 locations like New York City and in Spain and Italy that have been most severely impacted by  
4  
5 the number of patients testing positive for COVID-19. Little is known of its impacts on  
6  
7 healthcare systems in communities where the outbreak has been less dramatic to date and how  
8  
9 front-line providers in these systems are coping with these impacts.  
10  
11

12 To address the lack of information on these issues, we used a novel technique for  
13  
14 conducting a rapid ethnographic assessment of the impacts of the COVID-19 pandemic on  
15  
16 physicians and staff of a Level 1 trauma center of Harborview Medical Center in Seattle  
17  
18 Washington that was among the first in the United States to be impacted by the pandemic.<sup>26</sup> Our  
19  
20 study had two aims: 1) assess the impacts of the COVID-19 pandemic on service delivery by  
21  
22 front-line health care providers working in acute care medical and emergency department  
23  
24 settings at the trauma center; and 2) identify strategies being used by these providers to cope with  
25  
26 the increased physical and mental health demands associated with the pandemic. Our  
27  
28 examination of impacts and strategies was guided by a conceptual framework grounded in the  
29  
30 social-ecological model of behavior. This model argues that individual behavior is shaped by  
31  
32 factors at multiple levels, including institutional, community, and policy levels in addition to  
33  
34 intrapersonal and interpersonal levels.<sup>27</sup> In this instance, the individual behavior is that of the  
35  
36 providers and patients that define the quality of care provided by one individual (the health care  
37  
38 provider) and received by another individual (the patient).<sup>28</sup> The social-ecological model has  
39  
40 been also used in other studies of health services delivery in emergency department settings.<sup>29</sup>  
41  
42  
43  
44  
45

## 46 **METHODS**

### 47 **Design Overview**

48  
49 The investigation reported here was embedded within a larger randomized comparative  
50  
51 effectiveness trial of the impact of a peer-integrated acute care to primary care and community  
52  
53  
54  
55  
56  
57  
58  
59  
60

1  
2  
3 care coordination intervention.<sup>30</sup> To assess implementation of the evidence-based interventions,  
4  
5 we utilized a mixed methods protocol that incorporates principles of Rapid Assessment  
6  
7 Procedures and Clinical Ethnography.<sup>31</sup> The Rapid Assessment Procedure Informed Clinical  
8  
9 Ethnography (RAPICE) approach was previously utilized to describe primary and secondary  
10  
11 COVID-19 preventive interventions, as well as ethical tensions and stepped coping strategies in  
12  
13 the early days and weeks of the pandemic.<sup>32</sup> In the study reported here, RAPICE was utilized  
14  
15 because the research team had already been trained in its use and had collected ethnographic data  
16  
17 at the trauma center related to the parent study prior to the COVID-19 outbreak,<sup>31</sup> it was  
18  
19 originally developed as a tool to iteratively assess and inform care delivery during mass violence  
20  
21 events<sup>33</sup> and natural disasters,<sup>34</sup> it could be implemented with minimal additional resources  
22  
23 within the framework of the larger comparative effectiveness trial, it is a minimally invasive  
24  
25 form of data collection that can be used when priority was given to service delivery, and it can  
26  
27 provide a depth of understanding to the challenges faced in service delivery not available from  
28  
29 quantitative surveys.  
30  
31  
32  
33  
34

### 35 **Participants**

36  
37 Study participants were patients and providers who interacted with or otherwise were observed  
38  
39 by members of the parent study research team (n = 5) engaged in the delivery of care within the  
40  
41 Trauma Center at Harborview Medical Center during a COVID-19-related April 2020 “surge”.  
42  
43 The facility is the only designated Level I trauma and burn center in Washington state and is the  
44  
45 regional trauma and burn referral center for Alaska, Montana, and Idaho. The 412-bed facility  
46  
47 has around 17,000 admissions, 259,000 clinic visits, and 59,000 ED visits annually<sup>35</sup> During the  
48  
49 month of April 2020, the hospital had 1,089 total admissions. On average, the daily COVID-19  
50  
51 census was 18 patients (range = 10-26 patients). Research team members included a trauma  
52  
53  
54  
55  
56  
57  
58  
59  
60

1  
2  
3 surgeon, emergency department physician, trauma center nurse manager, acute care medical  
4 consultation-liaison psychiatrist, and social worker, each of whom served as participant  
5  
6 observers (POs) in the trauma center. Each team member had an opportunity to observe various  
7  
8 components of acute care delivery, from triage management and emergency care to surgical  
9  
10 procedures, in-hospital mental health service delivery, and trauma center to primary care  
11  
12 linkages. Participants were given training by the first author to assume the role of POs during  
13  
14 their shifts in the trauma center. This training included the principles and practice of RAPICE,  
15  
16 what information to collect and how, (i.e., through observation and informal interviews with  
17  
18 other providers and staff), how to record information collected in field jottings and field notes,  
19  
20 and how to acknowledge and manage the researcher's subjectivity through reflexivity, or  
21  
22 systematic awareness of the potential for bias and distortion.<sup>36</sup>  
23  
24  
25  
26  
27

### 28 **Data Collection**

29  
30 Data included observations and interactions with patients and other providers made while  
31  
32 engaged in delivering routine clinical services. POs were charged with observing and recording  
33  
34 events that illustrate the impacts of the pandemic on provider performance and well-being and on  
35  
36 provider interactions with patients, family members and other providers. They also informally  
37  
38 collected reports from other acute care providers and staff of physical and emotional impacts of  
39  
40 additional workload. Finally, POs were asked to obtain information on strategies used by  
41  
42 providers to cope with the increased personal and professional demands imposed by the  
43  
44 pandemic. The trauma center providers and staff were aware of the participant observer's role as  
45  
46 researchers involved in the parent study and the focus of their investigation per approval by the  
47  
48 IRBs of the University of Washington and University of Southern California (UP-20-00298)  
49  
50  
51  
52  
53  
54  
55  
56  
57  
58  
59  
60

1  
2  
3 prior to the initiation of the investigation. Informed consent from the participant observers  
4 themselves was obtained from the first author.  
5  
6

7  
8 Information on these observations and interactions were recorded through periodic  
9  
10 jottings summarizing observations and interactions and more detailed field notes that could be  
11  
12 updated each day. Field notes also included impressions of events observed and exchanges with  
13  
14 other providers and staff, as well as preliminary interpretations of the significance of these events  
15  
16 and exchanges. Each PO then participated in a semi-structured debriefing interview with the first  
17  
18 author to clarify and expand upon information contained in jottings and field notes and provide a  
19  
20 preliminary interpretation of their observations and interactions. A copy of the debriefing  
21  
22 interview guide is provided as a supplementary document. Debriefs lasting between 50 and 60  
23  
24 minutes in duration were conducted using the Zoom video conferencing platform, recorded, and  
25  
26 transcribed for analysis. Written copies of debriefs were then provided to the POs, enabling them  
27  
28 to revise or elaborate on comments made.  
29  
30  
31

### 32 33 **Data Analysis** 34

35 The first author reviewed all data collected by the POs, and performed a preliminary analysis,  
36  
37 using the immersions/crystallization<sup>37</sup> and focused thematic analysis techniques<sup>38</sup> that are part of  
38  
39 the RAPICE methodology.<sup>31</sup> The first author reviewed the data and then queried each PO during  
40  
41 the debrief to gain more insight into the data and its context and to obtain a preliminary  
42  
43 interpretation of the meaning and significance of data provided by the PO. Two hundred and  
44  
45 sixty-eight double-spaced pages of field notes, jottings, memos, documents and transcripts of the  
46  
47 member-checking debriefing interviews collected over a four-week period were then coded by  
48  
49 the first author to condense the data into analyzable units. Segments of text ranging from a  
50  
51 phrase to several paragraphs were assigned codes based on a priori (e.g., from a semi-structured  
52  
53  
54  
55  
56  
57  
58  
59  
60

1  
2  
3 interview guide) or emergent themes (also known as open coding). Following the open coding,  
4  
5 codes were assigned to describe connections between and within categories (also known as axial  
6  
7 coding). Based on these codes, QSR NVivo 12 was used to generate a series of themes arranged  
8  
9 in a treelike structure connecting text segments grouped into separate categories of codes or  
10  
11 “nodes.” Consistent with previously explicated RAPICE methods,<sup>31</sup> a discussion then ensued  
12  
13 until both the POs and the first author reached consensus as to the meaning and significance of  
14  
15 the data.  
16  
17

### 18 19 **Patient and Public Involvement**

20  
21 Patients and the public were not involved in the design or execution of this study.  
22  
23

## 24 **RESULTS**

25  
26 Overall, our analysis revealed four broad impacts of the COVID-19 pandemic on service  
27  
28 delivery: 1) impacts on procedures, 2) impacts on providers, 3) impacts on patients, and 4)  
29  
30 overall impacts on quality of care. Each of these themes are linked together at four broad levels  
31  
32 of a socio-ecological model of influences on patient care, illustrated in Figure 1 below.  
33  
34

35 Figure 1 about here  
36  
37

38 The outermost or environmental level is dictated by the novel coronavirus and its global  
39  
40 spread and includes the nature of virus transmission; social and biological characteristics of risk  
41  
42 and resilience; public health guidelines for preventing the spread of infection; risk of re-  
43  
44 infection; disease sequelae; survival rates; and clinical outcomes. The second level is the external  
45  
46 or macro service setting that has dictated the supply (e.g., availability of personnel and  
47  
48 equipment like PPE and ventilators) and demand (e.g., number of patients seen overall, patients  
49  
50 who test positive for COVID-19 or are under investigation for having COVID-19, and the nature  
51  
52 of the problems seen). The third level is the internal or mezzo service setting of the healthcare  
53  
54  
55  
56  
57  
58  
59  
60

system and includes the availability of beds to handle increased demand, healthcare system guidelines and policies put in place to ensure the safety and health of both patients and providers, and the transition to delivery of services using telehealth platforms to reduce the need for patients to be physically present at the hospital. The fourth level is that of the individual provider and patient or micro service setting and includes variations in the demands placed on individuals that include the anxiety related to fear of infection, depression, ethical conflicts, social tension, and stress, and the resources and strategies used by individuals to cope with these demands.

### Theme 1. Impacts on Procedures

The first theme of impacts on procedures and quality of care can be divided into three subthemes: 1) challenges related to testing patients for COVID-19; 2) altering procedures to insure adequate social distancing; and 3) use of PPE. Each of these represent the interconnections between Levels 1 to 4 described above and are examined in detail below.

Illustrative quotations from fieldnotes and interviews for each subtheme are provided in Table 1.

**Table 1. Impacts of COVID-19 pandemic on clinical procedures**

| Subtheme                  | Level | Illustrative quote                                                                                                                                                                                                                                                                                                                                                                                                                                                                                                                                                                                                                                                                                                                                                                                                                                                   |
|---------------------------|-------|----------------------------------------------------------------------------------------------------------------------------------------------------------------------------------------------------------------------------------------------------------------------------------------------------------------------------------------------------------------------------------------------------------------------------------------------------------------------------------------------------------------------------------------------------------------------------------------------------------------------------------------------------------------------------------------------------------------------------------------------------------------------------------------------------------------------------------------------------------------------|
| <b>COVID testing</b>      |       |                                                                                                                                                                                                                                                                                                                                                                                                                                                                                                                                                                                                                                                                                                                                                                                                                                                                      |
| Delay in care             | 1,3   | <i>Any trauma who is intubated (which is most of our sick trauma patients) is considered COVID positive coming in and we have to perform the initial resuscitation and evaluation in airborne precautions and limit people/supplies in the room. This can sometimes cause a delay in some of the care. -fieldnote</i>                                                                                                                                                                                                                                                                                                                                                                                                                                                                                                                                                |
| Impact on quality of care | 1,2,3 | <i>... sometimes patients have you know what normally we would consider to be relatively urgent things and we would just get the patient down to the OR quickly because there is the potential for them to decompensate. They might not be dying in front of you, but there is the potential for them to decompensate. And that sort of decision of like 'hey should we like in this situation to preserve PPE, like get this COVID test and wait because we think the patient's kind of going to be able to make it a few hours without decompensating,' that I find kind of challenging because it feels like you're sometimes providing maybe not the best care because normally you would go straight down to the operating room but there's also all these layers of if I do that, you know it uses this much more PPE and what not. - debriefing interview</i> |
| Guideline uncertainty     | 1,3,4 | <i>Constantly evolving pathways for COVID testing and clearance which is understandable but no clear consensus on a day to day basis, or at least a lot of confusion. -fieldnote</i>                                                                                                                                                                                                                                                                                                                                                                                                                                                                                                                                                                                                                                                                                 |
| <b>Social distancing</b>  |       |                                                                                                                                                                                                                                                                                                                                                                                                                                                                                                                                                                                                                                                                                                                                                                                                                                                                      |
| Impact on procedures      | 1,3   | <i>I think, you know, we're a teaching hospital so anything that happens, anything that happened, I should say in the past, happened with a large group of people. You know there's the people who are performing the task and then the observers who are learning.</i>                                                                                                                                                                                                                                                                                                                                                                                                                                                                                                                                                                                              |



The observers are no longer present for any of that. And even the activities that are being provided have been rethought to a point where we can pare them down to just the minimum number required. And so, so yes absolutely. There's a significant amount of workflow changes that occurred to minimize the numbers of people that are involved. – debriefing interview

|                                      |       |                                                                                                                                                                                                                                                                                                                                                                                                                                                                                                                                                                                                                         |
|--------------------------------------|-------|-------------------------------------------------------------------------------------------------------------------------------------------------------------------------------------------------------------------------------------------------------------------------------------------------------------------------------------------------------------------------------------------------------------------------------------------------------------------------------------------------------------------------------------------------------------------------------------------------------------------------|
| Reducing patient need to visit ED    | 1,2,3 | Worked with patient to avoid ER a few weeks ago after a fall by coordinating nurse & doctor phone call; resulted in patient creating sling and icing injury. Resolved without visit to ER. Pt needs to go to doctor & physical therapy often for pain management and routine care for chronic conditions. Clinics do not want her coming in because not “absolutely necessary.” -jotting                                                                                                                                                                                                                                |
| Impacts on provider interactions     | 1,3,4 | Also, we note the geography of our ED has changed so keep > 6 feet of space between patients and allow for providers in patient care areas, so providers no longer congregate together in non-clinical spaces and sit separate from nurses which decreases clinical communication. There were no bad outcomes, just notable how much harder it is to communicate as a whole clinical team. -fieldnote                                                                                                                                                                                                                   |
| Reduced presence of family members   | 1,3,4 | And then I really think one of the biggest things that's been sort of hard I think for us as a group and I think for all healthcare providers sort of who are taking care of any patient, COVID positive or not, is that, is the fact that you know we really aren't able to have family members in the hospital almost at all, which is a very different way than we usually practice. And that's been really hard I think on everyone in sort of the hospital but also the patients and their families. -debriefing interview -debriefing interview                                                                   |
| Use of telehealth                    | 1,3,4 | Before, when all this started we were not set up for telehealth in anyway, we did do phone calls that's always been something but it was seen as only, we only did that if there was some really extenuating circumstances, or if something was so minor that it just seemed better to do it over phone. So as soon as really drastic measures were being taken place to call patients like “do you really need this, or can you wait until June”. You know things started to be more and more integrated into the telehealth way and Zoom was being used. -debriefing interview                                        |
| <b>Impact on quality of care</b>     | 3,4   | One of the patients who has a lot of chronic illnesses..., he self-identified as someone whose not a phone person and is, notices himself that as engaged as much and getting distracted over the phone, and just is the kind of person that favors in person contact for a variety of reasons. And so, it really inhibited our work together and that he is less able to get into to a state of readiness to do therapeutic work because he's just distracted and then generally seeming feeling a lot more hopeless. -debriefing interview                                                                            |
| <b>Use of PPE</b>                    |       |                                                                                                                                                                                                                                                                                                                                                                                                                                                                                                                                                                                                                         |
| Impacts on procedures                | 1,3   | It also limits our ability, like we as the attendings don't go into the room. We sort of stand back, not in airborne, N-95 precautions, we sort of stand back to preserve PPE because we usually don't, you know we're not usually the ones like doing stuff to the patient -fieldnote                                                                                                                                                                                                                                                                                                                                  |
| Impact on interactions with patients | 3,4   | I think that some people do feel apprehensive that they can't see your face but also that you know you may be a risk to them, and sort of I feel like sometimes sends that signal even though you're trying to obviously do the right thing and protect them. I mean classically people have worn masks in hospitals when they have been sick, right? I mean that's why we've worn masks, is if you have like a runny nose or a cough or something. Just as an extra layer of protection. So, it's always been like oh stay away from that person with the mask on because they're you know sick. -debriefing interview |
| Challenges in wearing                | 3,4   | I don't know if you've seen these masks, I mean you know, we have the tie masks, they're impossible, like you can't wear them all day and getting them on and off, I got a bunch somewhere, but they're hard to tie, so you're thinking about how to sterilize them, and the, they're tie masks they're not like, they used to have better ear masks but they are conserving those for the patients, those stay on, these, these don't unless you're really good at tying them. -debriefing interview                                                                                                                   |

## COVID-19 testing



1  
2  
3 The implementation of a policy that all patients requiring acute care undergo testing for COVID-  
4 19 because of a need to preserve PPE for confirmed COVID-19 patients or patients at high risk  
5  
6 19 because of a need to preserve PPE for confirmed COVID-19 patients or patients at high risk  
7  
8 for COVID-19 has resulted in delays in getting treatment for often life-threatening conditions.  
9  
10 For patients with severe mental health issues, getting consent to perform testing has been  
11  
12 problematic. Especially challenging for providers has been patients showing symptoms that are  
13  
14 similar to those of COVID-19, such as withdrawal from heroin or other illicit substances.  
15  
16 Although the delays in getting treatment do not appear to have compromised the quality of care  
17  
18 received, providers expressed concern that patients needing urgent but not immediate attention  
19  
20 become sicker while awaiting COVID-19 test results. Experience with guideline implementation  
21  
22 and its effects on workflow and service delivery, along with information from other healthcare  
23  
24 systems, led to changes in guidelines and protocols for COVID-19 screening. Changes in  
25  
26 guidelines resulted in delays in delivering care and confusion over what guidelines were in effect  
27  
28 at any point in time.  
29  
30  
31

### 32 33 Social Distancing 34

35 According to the Centers for Disease Control, social distancing, also called “physical  
36  
37 distancing,” means keeping a safe space between yourself and other people who are not from  
38  
39 your household.<sup>39</sup> To practice social or physical distancing, the CDC recommends that one stay  
40  
41 at least 6 feet (about 2 arms’ length) from other people who are not from your household in both  
42  
43 indoor and outdoor spaces. Within the trauma center, social distancing included protocols and  
44  
45 procedures designed to minimize person-to-person contact.  
46  
47  
48

49 Imposition of social distancing guidelines for the benefit of both patients and providers  
50  
51 led to several changes in procedures, including reducing the need for patients to come to ED and  
52  
53 suspension of nonessential procedures. Social distancing guidelines also impacted patterns of  
54  
55  
56  
57  
58  
59

1  
2  
3 interactions among providers. Routine interactions such as morning briefings and grand rounds  
4 with residents were either suspended or conducted remotely. Conferences with colleagues  
5 concerning patient clinical status and treatment were altered by requirements for physical  
6 separation (e.g., limiting the number of providers in a patient's room, communicating remotely.  
7  
8  
9  
10  
11

12 Perhaps the greatest impact of social distancing guidelines noted by POs was the  
13 restrictions on the presence of family members. This was especially problematic because the  
14 restrictions deprived patients of essential sources of social and emotional support, making it  
15 difficult for providers to communicate with family members and for family members to be  
16 updated on patient status, and led to some patients dying alone without family members being  
17 present.  
18  
19  
20  
21  
22  
23  
24  
25

26 In some settings like behavioral health and outpatient psychiatry, there was a greater use  
27 of telehealth services. For the most part, these services were provided over the telephone or on  
28 the Zoom platform. Because of social distancing, some behavioral health consultations were  
29 performed without use of standard assessment protocols (i.e., administration of questionnaires to  
30 evaluate mental health status). Moreover, some patients expressed reluctance or unwillingness to  
31 obtain treatment by telephone, making service delivery problematic. This reluctance led to  
32 concerns that such patients were not receiving optimal and necessary services.  
33  
34  
35  
36  
37  
38  
39  
40  
41

#### 42 Use of PPE

43  
44 There are several facets of Personal Protective Equipment (PPE) use that were mentioned by  
45 providers, including policies that were designed to preserve the supply of PPEs in units like the  
46 operating rooms, challenges involved in wearing PPEs, including the time involved in “donning  
47 and doffing” which created delays in performing procedures, and the perceptual separation from  
48 patients created by the PPEs. Providers were required to undergo training in the use of PPEs and  
49  
50  
51  
52  
53  
54  
55  
56  
57  
58  
59  
60

were monitored for proper use in the workplace. Some providers commented on the potential risk of infection created by improper use and the unwillingness of other providers to use PPEs in some units prior to the implementation of new guidelines mandating their use that replaced old guidelines that merely recommended their use.

## Theme 2, Impacts on providers

The second major theme related to the impact of the pandemic in general and its impact on service delivery in particular to the providers themselves. This theme was segmented into three distinct subthemes (Table 2): 1) risk of infection; 2) negative impacts; and 3) provider coping strategies and resources.

**Table 2. Impacts of COVID-19 pandemic on health care providers**

| Subtheme                 | Level | Illustrative quote                                                                                                                                                                                                                                                                                                                                                                                                                                                                                                                                                                                                                                                                                            |
|--------------------------|-------|---------------------------------------------------------------------------------------------------------------------------------------------------------------------------------------------------------------------------------------------------------------------------------------------------------------------------------------------------------------------------------------------------------------------------------------------------------------------------------------------------------------------------------------------------------------------------------------------------------------------------------------------------------------------------------------------------------------|
| <b>Risk of infection</b> | 1,3,4 | <i>...the kind of thing that would really be unexpected and really upsetting is having evaluated a patient, for instance, this week who was negative and then they [tested positive], and for all of us to hear about that and then have to worry about that. -debriefing interview</i>                                                                                                                                                                                                                                                                                                                                                                                                                       |
| <b>Negative impacts</b>  |       |                                                                                                                                                                                                                                                                                                                                                                                                                                                                                                                                                                                                                                                                                                               |
| Anxiety                  | 1,3,4 | <i>I mean there's a fair bit of anxiety, for sure. I think with regards to, you know exposure, family, sort of uncertainty. And just like trying to do the best you can in a different sort of world, if you want to call it that, with the COVID sort of being the primary thing that comes up every step of the way. Like sometimes you're standing there and you're like oh my God this patient is bleeding to death, can we stop talking about the COVID? You know but it's something that we're just having, having to talk about. I think, I think that the anxiety part. -debriefing interview</i>                                                                                                     |
| Depression               | 3,4   | <i>It's been sad, just the effect that this has had on these 2 patients in particular. One because I feel like that for months and months and months, we've been working together to get out more and to spend more time doing things, but, you know, give them a sense of purpose or satisfaction. It almost hurts them that much more, you know they've been working towards it, both of them had achieved the task of getting out more, so just as they were starting to get it together and like "oh this like really does work and this is really helping" and seeing some improvement and symptoms, and then it being taken away from them is pretty earth shattering. -debriefing interview</i>        |
| Stress                   | 4     | <i>There are providers that are stressed. I mean, it's the COVID-19 stress, it's the daycare stress, unemployment stress, kids not getting jobs. It's a whole morass, as you probably already know. things that are happening to people. -debriefing interview</i>                                                                                                                                                                                                                                                                                                                                                                                                                                            |
| Guilt                    | 4     | <i>Yeah, and I think people feel conflicted that you get to go to work and see your friends and so you get to have those at work and you get to have a conversation with adult friends in person and a lot of people don't get to do that anymore. And that sounds fun... I think there's also this is little bit of guilt in I know I told you that [the hospital] is not seeing this deluge of patients and you know, the community, the restaurants are giving out free lunch and local celebrities... have dropped off some food or some free thing to healthcare workers... and you're sort of like well actually we aren't seeing that many patients right now with COVID-19. -debriefing interview</i> |
| Ethical                  | 3,4   | <i>I think one of the early discussions we had...we have a program here where we use ECMO</i>                                                                                                                                                                                                                                                                                                                                                                                                                                                                                                                                                                                                                 |

|                                        |       |                                                                                                                                                                                                                                                                                                                                                                                                                                                                                                                                                                                                                                                                                                                                                                                                                                                                                                                                                                                                                   |
|----------------------------------------|-------|-------------------------------------------------------------------------------------------------------------------------------------------------------------------------------------------------------------------------------------------------------------------------------------------------------------------------------------------------------------------------------------------------------------------------------------------------------------------------------------------------------------------------------------------------------------------------------------------------------------------------------------------------------------------------------------------------------------------------------------------------------------------------------------------------------------------------------------------------------------------------------------------------------------------------------------------------------------------------------------------------------------------|
| conflicts                              |       | <i>for respiratory failure. And one of the early discussions we had here with not just the hospital..., but also with other ECMO centers throughout the Pacific Northwest was what are we going to do in the anticipation of this surge of patients? Does it make sense to utilize a very high resource, you know procedure, for a very, very small number of patients, where a lot of PPE is going to be used and a lot of dedication, a lot of dedicated staff. And at that time, we kind of made the decision that we, that we wouldn't...that did not make sense. That we wouldn't offer that service. As it started to unfold, that, you know the surge that we were anticipating didn't develop quite in the way that we thought it would or we feared that it would, we then kind of, as a group, reinstated the procedure and recognizing that, well it seems like we do have the capacity both in terms of staff and space and with PPE and equipment to provide that service. -debriefing interview</i> |
| Social tension                         | 4     | <i>My colleague that's been here for 15 years, she's great. At the end [of our shift] as we were saying goodbye to her, she asks me to tell her everything you've learned [from this study]. She's pushing me; she said "okay [name removed], so why do you get to do research? That's a pretty privileged thing to do and then why don't you come here [to treat patients], I'm doing this yes you know, and you know it's also like we need people." -debriefing interview</i>                                                                                                                                                                                                                                                                                                                                                                                                                                                                                                                                  |
| <b>Coping strategies and resources</b> |       |                                                                                                                                                                                                                                                                                                                                                                                                                                                                                                                                                                                                                                                                                                                                                                                                                                                                                                                                                                                                                   |
| Procedural innovations                 | 3,4   | <i>We want to make sure that our outpatients clinic and providers are safe and patients with COVID go to outpatient units and so it's an important workaround but for patients that will have trouble with Telemedicine and Telehealth, it does feel like the emergency department is now not only a safety net but it's sort of the end of the road for a lot of people -debriefing interview</i>                                                                                                                                                                                                                                                                                                                                                                                                                                                                                                                                                                                                                |
| Prevention                             | 1,3,4 | <i>I think most people including myself are going home and just showering and then you know washing the clothes that they were wearing to and from the hospital. And everyone at the hospital has moved to where its just wearing scrubs as soon as they come in. -debriefing interview</i>                                                                                                                                                                                                                                                                                                                                                                                                                                                                                                                                                                                                                                                                                                                       |
| Social support                         | 3,4   | <i>The community very much wanted to contribute whatever they could to recognize the work that healthcare is providing for the communities, which has been wonderful. But we want to make sure that information makes it to staff as well. -debriefing interview</i>                                                                                                                                                                                                                                                                                                                                                                                                                                                                                                                                                                                                                                                                                                                                              |
| Mental health services                 | 3,4   | <i>The university had this drop-in session of talk about your concerns and one of my colleagues dropped in and he said that he is saw every healthcare worker has sort of their own piece of the thing that's making their life harder and what he would be most helpful emergency medicine doctors talking about what makes emergency medicine. So, we kind of developed our own faculty we just had like drop-ins in zoom meetings where you could go in and it was free from judgement and you could talk about whatever you needed to talk about. I think a lot of people found those to be helpful and I dropped in a couple times especially kind of early on. -debriefing interview</i>                                                                                                                                                                                                                                                                                                                    |
| Information                            | 3,4   | <i>I think knowledge has helped already a lot. In the beginning, again there was so little known about, even the, how the disease was transmitted was very, very little was known in the beginning. There's still some question in that, you know what is considered safe what's not considered safe. What procedures can we perform using this type of PPE versus that type of PPE. I think when staff understand everything that there is to know about a given, you know disease transmission and process, then that makes them a little more comfortable. -debriefing interview</i>                                                                                                                                                                                                                                                                                                                                                                                                                           |
| Self-care                              | 1,3,4 | <i>I think, I think for me what made the difference is being very purposeful with what I've been doing with my time, and I think for the vast majority of humans and providers, we create a system of coping for ourselves and when those traditional means are getting thwarted or changed, we have to find a good replacement for that. And I think that yeah being purposeful that how you're spending your time and customizing it to your needs and what gets you through is important, but I also think that means having the boundaries between work and personal life so that you have the time to, one, think about what you need to do to get yourself through, and two, actually do those things -debriefing interview</i>                                                                                                                                                                                                                                                                             |

### Risk of infection

The first subtheme was provider assessments of the risk of infection to themselves and to family members. Unlike other healthcare systems where providers have died from COVID-19, there have been no known reported provider deaths in this healthcare system, even though it is widely recognized that some providers have tested positive for COVID-19. Nevertheless, although POs did report instances of a lack of concern by themselves or by others, sometimes reflected in the absence of masks worn in workspaces prior to the establishment of a policy making their use mandatory, they also cited numerous instances of concern about getting infected. These concerns extended to the risk of infecting family members. The risk of infection was associated with factors such as the provider's age, occupation (e.g., anesthesiologists), and work setting (e.g., operating room, ICU).

### Negative impacts

Negative impacts of the pandemic on hospital staff, included anxiety related to the fear of infection to self and family members; feelings of sadness and depression related to separation of family members from dying patients and not being able to deliver necessary care, the experience of ethical tensions related to the perceived risk of coming to work sick and infecting others, engaging in other forms of risk behavior like violating stay at home orders, and the concern that some forms of care are currently being or will likely be rationed; guilt over having the opportunity to interact with colleagues when others must stay at home; interactions with colleagues that highlight undercurrents of social tension related to professional disciplinary differences (e.g., research vs clinical care) or failure to adhere to guidelines regarding distancing; and stress related to other aspects of the pandemic, including financial stability, impacts on loved ones, and isolation and confinement at place of residence.

### Provider coping strategies and resources

A third subtheme reflected different strategies and techniques employed by providers to cope with changes in service delivery and their impacts on both quality of care and on provider mental health. Participant observers noted several instances of innovation in performing procedures while adhering to guidelines intended to protect both providers and patients from infection. These included adapting procedures for performing psychiatric evaluations for patients and development of workarounds to ensure service delivery.

A second important form of coping revolved around efforts to engage in behaviors and practices intended to reduce the risk of infection to self and others. These included behaviors at the workplace (use of homemade gels to clean hands or commercially available disinfectants to deep-clean workspaces, not wearing street clothes or jewelry), outside of work (changing clothes before going shopping, practicing social distancing), and at home (changing clothes before going indoors, showering, and physical separation, including staying in hotel rooms or Air B&Bs).

Social support was another significant coping resource reported by the participant observers. This included support provided by family members, some of whom were themselves healthcare providers, and support from colleagues at work such as assistance in donning PPE, acquiring PPE and adjusting schedules to cover for colleagues at risk for infection and illness. It also included support from the community, manifested in deliveries of food and public expressions of gratitude.

A fourth important coping resource was the availability of mental health services. The healthcare system provided counseling services to providers and staff. These included drop-in sessions for all hospital employees with mental health service providers and drop-in sessions developed by individual units or departments within the system. Both types of sessions occurred



over Zoom. Although the services provided were acknowledged to be helpful by those providers and staff who utilized them, there was also a sense that they were not widely used.

A fifth important resource was information. With experience and information provided by the system and preliminary research by others, the level of uncertainty associated with the pandemic, including risk of infection, duration of the pandemic, and best practices for treatment, appeared to be diminishing, if only by degrees.

Finally, there were numerous reports of attempts at self-care. These included a focus on healthy eating habits, adopting alternative forms of physical exercise, engaging in mindfulness and reflexivity, and spending more time outdoors.

### Theme 3. Impact on patients

The third theme was the impact of the pandemic on the patients seen in the acute care setting. This theme included four subthemes (Table 3): 1) patient access to care; 2) patient fears of getting infected at the hospital; 3) changes in presenting problems; and 4) disparities in patient risk for COVID-19 and healthcare access.

**Table 3. Impacts of COVID-19 pandemic on patients**

| Subtheme                   | Level | Illustrative quote                                                                                                                                                                                                                                                                                                                                                                                                                                                                                                                                                                                     |
|----------------------------|-------|--------------------------------------------------------------------------------------------------------------------------------------------------------------------------------------------------------------------------------------------------------------------------------------------------------------------------------------------------------------------------------------------------------------------------------------------------------------------------------------------------------------------------------------------------------------------------------------------------------|
| <b>Access to care</b>      | 2,3,4 | <i>Also, transitions for people seeking treatment have been difficult. Our detox center for alcohol detox treatment now requires negative COVID testing. Our outpatient based opioid treatment program partner now only utilizes phone appointments. Many community mental health programs are no longer accepting walk-ins. I'm hopeful this will change, but service access for patients with SUD [substance use disorder] is really difficult right now. - debriefing interview</i>                                                                                                                 |
| <b>Fear of infection</b>   | 2,3,4 | <i>There's a lot of patients that are being fully recognized by the ED now and it's risky for them. They don't want to be there, I mean, they are there because they're having something unrelated to covid-19, chest pain for example. Where they want emergency evaluation and they need one. But they fully realize that as the minutes tick, they perceive just being in the ER is risky and so they are anxious about that. A lot of questions like, "do I really need to do that? Can I just go? When is this test going to be done? Can I get this as an outpatient?" -debriefing interview</i> |
| <b>Presenting problems</b> | 2,3,4 | <i>We have not been as busy from a trauma perspective, although the last couple weeks have been picking up as people, I think, are getting a little more antsy with the social distancing and things. We've certainly seen a lot, like a lot more, or it seems like more at least of the self-harm and non-accidental type of traumas, which has been challenge in and of itself. And then on the general surgery side it seems like people with like normal problems like</i>                                                                                                                         |

appendicitis and you know infected gallbladders are coming in later than the otherwise would I think out of concern for, you know, being in the hospital if they don't need to be which is a valid concern. -debriefing interview

|                         |       |                                                                                                                                                                                                                                                                                                                                                                                                                                                                                                                                                                                                                                                                                                                                                                                                                                                                                                                                                       |
|-------------------------|-------|-------------------------------------------------------------------------------------------------------------------------------------------------------------------------------------------------------------------------------------------------------------------------------------------------------------------------------------------------------------------------------------------------------------------------------------------------------------------------------------------------------------------------------------------------------------------------------------------------------------------------------------------------------------------------------------------------------------------------------------------------------------------------------------------------------------------------------------------------------------------------------------------------------------------------------------------------------|
| <b>Risk disparities</b> | 1,2,4 | <p>One thing that I have noticed in taking care of patients with COVID-19 how many people with COVID-19 have a lot of vulnerabilities in the social determinants of health that kind of layer on that person's ability to manage their assets. And so, the number of patients non-English-speaking is 75% of the patients that I have seen with COVID-19 English-speaking. Either service sector uninsured or underinsured with little access to ability to physically distance at home or multi-generational living where the mom works but she has a baby and Grandma takes care of the baby during the day and how do you take care of a baby and older parent? How do you reconcile that in a two-bedroom condo 1 bathroom when someone take public transportation and so I just been struck with the fact that this is going to take a huge toll on people of color or the Spanish-speaking people who are immigrants? -debriefing interview</p> |
|-------------------------|-------|-------------------------------------------------------------------------------------------------------------------------------------------------------------------------------------------------------------------------------------------------------------------------------------------------------------------------------------------------------------------------------------------------------------------------------------------------------------------------------------------------------------------------------------------------------------------------------------------------------------------------------------------------------------------------------------------------------------------------------------------------------------------------------------------------------------------------------------------------------------------------------------------------------------------------------------------------------|

### Patient access to care

One of the biggest challenges faced by patients has been in getting access to care. The ED saw more patients who had appointments for nonessential care in other departments cancelled due to office closures. POs also noted changes in patient-provider interactions resulting from social distancing and PPE use and the suspension of nonessential procedures.

### Fear of getting infected at the hospital

Patients expressed concerns about becoming infected while getting treated at the hospital and infecting family members in turn. Other patients have delayed getting medications refilled at the hospital to reduce the risk of infection.

### Changes in presenting problems

Some of the POs also noted more patients with mental and behavioral health issues that have been exacerbated by the threat of infection, collapse of the economy, and the challenges in obtaining medication and nonessential clinical services. Delays in seeking or receiving services due to the pandemic was also perceived to result in patients presenting with more severe symptoms or clinical conditions when they are finally seen.

### Disparities in risk for infection



1  
2  
3 Finally, the pandemic has illustrated the health disparities that have long been associated with the  
4 risk of illness and the accessibility of health care. Providers reported several instances of patients  
5 from disadvantaged backgrounds, including older adults, homeless, non-English-speaking  
6 immigrants, the poor, and the disabled, who are overrepresented in acute care safety-net settings  
7 under normal circumstances, but who also test positive for the novel coronavirus or are a  
8 COVID-19 PUI (person under investigation) and who reside in households where the risk of  
9 transmission of the virus is high.  
10  
11  
12  
13  
14  
15  
16  
17  
18

#### 19 **Theme 4. Overall impact on quality of care**

20  
21 Despite concerns expressed by staff over the potential effects of delays in testing for COVID-19  
22 and the challenges associated with social distancing and PPE use, the overall quality of care  
23 delivered to patients does not appear to have been significantly affected. This is attributed by  
24 providers and staff to four factors (Table 4). First, the April 2020 surge was less than anticipated.  
25 After the initial outbreak of cases, the pandemic had more of an impact on assessment of cases  
26 that were coming in than on the number of patients actually treated. Workload did increase in  
27 many instances due to the imposition of new procedures related to PPE, distancing and coverage  
28 for personnel at risk for infection, but there was no sense that people were working longer hours,  
29 for instance. Second, the system was viewed by its employees as having been prepared for the  
30 pandemic from an operations perspective. With the initial outbreak at an assisted-care nursing  
31 facility in a suburban community, a regional incidence response plan and hospital guidelines for  
32 patient screening, social distancing and PPE use were implemented. Some of those guidelines  
33 changed over time as the anticipated surge failed to materialize and as experience dictated  
34 necessary improvements to reduce delays and maintain standards for service delivery. Third,  
35 while some supplies such as N95 masks were in short supply and procedures for screening ED  
36  
37  
38  
39  
40  
41  
42  
43  
44  
45  
46  
47  
48  
49  
50  
51  
52  
53  
54  
55  
56  
57  
58  
59  
60

patients for COVID-19 were based on the perceived need to limit provider use of PPE to patients who tested positive or were at significant risk for infection, supplies viewed as essential for responding to the pandemic, including PPE and ventilators, were available and adequate to the current demand. Finally, despite the negative impacts on providers listed earlier, morale among hospital staff was high. Providers and staff appeared to be managing with the resources available to them that enable them to provide the best care possible, seek emotional support, engage in self-care, and exercise preventive measures designed to reduce the risk of infection.

**Table 4. Overall impacts of COVID-19 pandemic on service delivery**

| Subtheme                         | Level | Illustrative quote                                                                                                                                                                                                                                                                                                                                                                                                                                                                                                                                                                                                                                                                                                                                                                             |
|----------------------------------|-------|------------------------------------------------------------------------------------------------------------------------------------------------------------------------------------------------------------------------------------------------------------------------------------------------------------------------------------------------------------------------------------------------------------------------------------------------------------------------------------------------------------------------------------------------------------------------------------------------------------------------------------------------------------------------------------------------------------------------------------------------------------------------------------------------|
| <b>Fewer cases than expected</b> | 1,2   | <i>Yeah, so we, you know we did prep for a much larger surge based on the initial predictions for Washington than we ended up having. I think as a result of pretty aggressive social distancing and stay at home orders, which if you look at them, the series of prediction sort of the surge got less and less. -debriefing interview</i>                                                                                                                                                                                                                                                                                                                                                                                                                                                   |
| <b>System was prepared</b>       | 2,3   | <i>At Harborview though, you know, we received patients from that event. It was not, it did not overwhelm us. We then, you know that sort of triggered the overall, sort of regional, you know, incident response structure that is in place today. And as we started to prepare for the surge, we were able to very easily keep up with the inflow of patients. And so, at this point the workload...you know people are still very much able to get their time off. The workload is, I mean there's work to be done but it's not overwhelming. And so, I think from that standpoint, we haven't seen the fatigue, the long hours, the multiple days, that you might see where, you know, kind of the picture that's being described in the, in New York right now. -debriefing interview</i> |
| <b>Supplies were adequate</b>    | 2,3   | <i>So, so the provider saw the 20 patients on the unit. And got ample goggles, masks and gloves on the unit from the nursing staff. -jotting</i>                                                                                                                                                                                                                                                                                                                                                                                                                                                                                                                                                                                                                                               |
| <b>High staff morale</b>         | 3,4   | <i>So, it's definitely, it's definitely something on people's minds. But does it affect the day-to-day performance? I have not seen that. People are absolutely willing to step in and do the work. -debriefing interview</i>                                                                                                                                                                                                                                                                                                                                                                                                                                                                                                                                                                  |

## DISCUSSION

This study identified four different kinds of impacts of the COVID-19 pandemic on delivery of clinical services in a Level 1 trauma center during a surge of cases that occurred the month of April 2020: procedural, provider, patient, and overall. Each impact highlighted two or more levels of a socio-ecological model of services delivery: the outermost or environmental service setting framed by the novel coronavirus and its global spread, the external or macro service setting framed by the supply and demand for care; the internal or mezzo service setting framed

1  
2  
3 by guidelines and policies put in place to ensure the safety and health of both patients and  
4 providers, and the micro service setting framed by individual patient and provider behavior.  
5  
6 Despite significant changes in procedures that included COVID-19 screening of all admitted  
7 patients, social distancing and use of PPE, as well as changes in patient characteristics and  
8 provider behavior, the overall impact of the pandemic on the quality of service delivery, as  
9 described by front-line providers, appears to have been minimal. This is attributed to having a  
10 smaller surge than expected, a quick response by the healthcare system to anticipated demands  
11 for service delivery and protection of patients and providers, available supplies, and high  
12 provider morale.  
13  
14  
15  
16  
17  
18  
19  
20  
21  
22  
23

24 Consistent with studies of earlier infectious disease pandemics,<sup>13-23</sup> and recent reports  
25 published during the early phases of the COVID-19 pandemic in China,<sup>40</sup> Italy,<sup>41</sup> and the U.S.,<sup>42</sup>  
26 reports of anxiety and fear of infection among trauma center providers and staff were  
27 widespread. Providers also reported instances of stress related to other aspects of the pandemic,  
28 including financial stability, impacts on loved ones, and isolation and confinement, which have  
29 also been found in studies of other pandemics.<sup>15,16</sup> However, there were also reports of depressed  
30 mood related to separation of family members from sick and dying patients and not being able to  
31 deliver necessary care, the experience of ethical tensions related to the perceived risk of coming  
32 to work sick and infecting others, engaging in other forms of risk behavior like violating stay at  
33 home orders, and the concern that some forms of care were currently being or likely to be  
34 rationed; guilt over having the opportunity to interact with colleagues when others must stay at  
35 home; and interactions with colleagues that highlight undercurrents of social tension related to  
36 professional disciplinary differences or failure to adhere to guidelines regarding distancing.  
37  
38  
39  
40  
41  
42  
43  
44  
45  
46  
47  
48  
49  
50  
51  
52  
53  
54  
55  
56  
57  
58  
59  
60

1  
2  
3 These impacts have not been reported in previous studies of the psychological impacts of other  
4  
5 infectious disease pandemics on healthcare providers.<sup>13-22</sup>  
6

7  
8 It is also quite likely that levels of anxiety and fear of infection was much less than has  
9  
10 been reported in other healthcare systems because the surge was much less than anticipated and  
11  
12 because there were no reports of providers and staff becoming severely ill or dying despite a  
13  
14 positive test.<sup>31</sup> Earlier studies of ED personnel and infectious disease pandemics have also noted  
15  
16 lower than expected prevalence of mental health problems, which have been attributed to the  
17  
18 greater resilience of individuals who choose this type of work.<sup>21</sup> We also identified several  
19  
20 strategies used by providers and staff to cope with the pandemic and its organizational and  
21  
22 individual impacts. Adaptive coping has been associated with reduced risk of psychiatric  
23  
24 morbidity has been reported in studies of other respiratory disease outbreaks.<sup>12,16,17,21</sup>  
25  
26  
27

28  
29 The study occurred in a healthcare setting that was one of the first to be impacted by the  
30  
31 pandemic. However, the impacts associated with the pandemic in this setting have not been as  
32  
33 severe as has been the case elsewhere, especially in New York City, limiting the generalizability  
34  
35 of our findings. Furthermore, our findings are limited by the relative short duration of  
36  
37 participation observation (1-4 weeks) in a single setting (trauma/emergency medicine) and the  
38  
39 constraints of engaging in participant observation while also performing intensive clinical tasks  
40  
41 under conditions of social distancing and use of PPE. In contrast to studies of previous infectious  
42  
43 disease pandemics,<sup>13,14,17,18,20,21</sup> no standardized measures were used to assess mental health  
44  
45 status. Our assessment of impacts on the quality of service delivery was based entirely on self-  
46  
47 report or observational data and not on objective measures of quality of care.  
48  
49  
50

51  
52 Despite these limitations, this study was one of the first to be conducted in the United  
53  
54 States that examined the impact of a still-unfolding infectious disease pandemic in a health care  
55  
56  
57  
58  
59

1  
2  
3 setting representing the first point of entry for COVID-19-positive patients. Although previous  
4  
5 studies of healthcare responses to infectious disease pandemics have also noted changes in  
6  
7 procedures,<sup>13,15,18</sup> this is the first study to our knowledge to examine the impact of these changes  
8  
9 on service delivery. The study utilized a standardized protocol for conducting ethnographic  
10  
11 research that enabled us to collect and analyze data in a short period of time with minimal impact  
12  
13 on patients or providers under conditions of social distancing and PPE use. The RAPICE  
14  
15 approach also has potential for assessing these impacts longitudinally and providing formative  
16  
17 evaluations of policies and procedures designed to mitigate them.  
18  
19  
20

## 21 CONCLUSIONS

22  
23 Although this study was conducted within one setting in one healthcare system in one  
24  
25 community, the findings offer some important lessons for healthcare systems that have yet to be  
26  
27 impacted, as well as systems that have been more severely impacted. Each of the levels in our  
28  
29 socio-ecological model were found to impact the delivery of services to patients in the time of  
30  
31 COVID-19, and variations at each of these levels account for variations in that delivery of care  
32  
33 globally.  
34  
35  
36

37 **Contributors:** LAP and DZ conceived and designed the study and the analysis plan. LW DN AE  
38  
39 and DZ collected the data and participated in data analysis, along with LAP. KM provided study  
40  
41 project management. All authors contributed intellectual content during the drafting and revision  
42  
43 of the work and approved the final version.  
44  
45  
46

47 **Funding:** This study was supported in part by the Patient-Centered Outcomes Research Institute  
48  
49 (PCORI) Award [IHS-2017C1-6151]. This research was also supported within the National  
50  
51 Institutes of Health (NIH) Health Care Systems Research Collaboratory by cooperative  
52  
53 agreement 4UH3MH106338-02] from the National Institute of Mental Health. Support was also  
54  
55  
56  
57  
58  
59  
60

1  
2  
3 provided by the NIH Common Fund through cooperative agreement [U24AT009676] from the  
4 Office of Strategic Coordination within the Office of the NIH Director. The content is solely the  
5 responsibility of the authors and does not necessarily represent the official views of PCORI, its  
6 Board of Governors or Methodology Committee, or the NIH.  
7  
8  
9  
10  
11

12 **Competing Interests:** All authors have completed the ICMJE uniform disclosure form at  
13 [www.icmje.org/coi\\_disclosure.pdf](http://www.icmje.org/coi_disclosure.pdf) and declare: all authors had financial support from the  
14 Patient-Centered Outcomes Research Institute and National Institutes of Health for the submitted  
15 work; no financial relationships with any organisations that may have an interest in the submitted  
16 work in the previous three years; no other relationships or activities that could appear to have  
17 influenced the submitted work.  
18  
19  
20  
21  
22  
23  
24  
25

26 **Ethical Approval:** All study procedures were approved by the IRBs of the University of  
27 Washington and University of Southern California (UP-20-00298) prior to the initiation of the  
28 investigation.  
29  
30  
31  
32

33 **Data Sharing:** Data used in this study is available from the corresponding author upon  
34 reasonable request. All personal identifiers found in the data will be removed prior to sharing.  
35  
36  
37

38 **Transparency Statement:** The lead author (the manuscript's guarantor) affirms that the  
39 manuscript is an honest, accurate, and transparent account of the study being reported; that no  
40 important aspects of the study have been omitted; and that any discrepancies from the study as  
41 planned (and, if relevant, registered) have been explained.  
42  
43  
44  
45  
46  
47  
48  
49  
50

## 51 REFERENCES

52  
53  
54  
55  
56  
57  
58  
59  
60

- 1  
2  
3 1. Cucinotta D, Vanelli M. WHO declares COVID-19 a pandemic. *Acta Biomed* 2020;91:157-  
4 60.  
5  
6
- 7  
8 2. Taubenberger JK, Kash JC, Morens DM. The 1918 influenza pandemic: 100 years of  
9 questions answered and unanswered. *Sci Transl Med* 2019;11(502):eaau5485. doi:  
10 10.1126/scitranslmed.aau5485.  
11  
12
- 13  
14 3. The Johns Hopkins University and School of Medicine. Coronavirus Center. COVID-19  
15 dashboard by the Center for Systems Science and Engineering (CSSE) at Johns Hopkins  
16 University. <https://coronavirus.jhu.edu/map.html>. (Accessed May 29, 2020).  
17  
18
- 19  
20 4. Bureau of Labor Statistics. Unemployment rate rises to record high 14.7 percent in April  
21 2020. [https://www.bls.gov/opub/ted/2020/unemployment-rate-rises-to-record-high-14-point-](https://www.bls.gov/opub/ted/2020/unemployment-rate-rises-to-record-high-14-point-7-percent-in-april-2020.htm?view_full)  
22 [7-percent-in-april-2020.htm?view\\_full](https://www.bls.gov/opub/ted/2020/unemployment-rate-rises-to-record-high-14-point-7-percent-in-april-2020.htm?view_full) (Accessed May 15, 2020).  
23  
24  
25
- 26  
27 5. California Coronavirus (COVID-19) Response. Stay home except for essential needs.  
28 <https://covid19.ca.gov/stay-home-except-for-essential-needs/#top>. (Accessed May 4, 2020).  
29  
30
- 31  
32 6. Morganstein JC, Fullerton CS, Ursano RJ, Donato D, Holloway HC. Pandemics: health care  
33 emergencies. In: Raphael B, Fullerton CS, Weisaeth L, Ursano RJ, eds. Textbook of disaster  
34 psychiatry, 2nd ed. New York: Cambridge University Press, 2017:270-84.  
35  
36
- 37  
38 7. Rubinson L, Mutter R, Viboud C, et al. Impact of the fall 2009 influenza A(H1N1)pdm09  
39 pandemic on US hospitals. *Med Care* 2013;51:259-65.  
40  
41
- 42  
43 8. Schanzer DL, Schwartz B. Impact of seasonal and pandemic influence on emergency  
44 department visits, 2003-2010, Ontario, Canada. *Acad Emerg Med* 2013;20(4):388-97.  
45  
46
- 47  
48 9. Panagioti M, Geraghty K, Johnson J, et al. Association between physician burnout and  
49 patient safety, professionalism, and patient satisfaction: a systematic review and meta-  
50 analysis. *JAMA Intern Med* 2018;178(10):1317-30.  
51  
52  
53  
54  
55  
56  
57  
58  
59

10. Tawfik DS, Scheid A, Profit J, et al. Evidence relating health care provider burnout and quality of care: a systematic review and meta-analysis. *Ann Intern Med* 2019;171(8):555-67.
11. Benedek DM, Fullerton C, Ursano RJ. First responders: mental health consequences of natural and human made disasters for public health and public safety workers. *Annu Rev Public Health* 2016;28:55-68.
12. Naushad VA, Bierens JJ, Nishan KP, et al. A systematic review of the impact of disaster on the mental health of medical responders. *Prehosp Disaster Med* 2019;34(6):632-43.
13. Nickell LA, Crighton EJ, Tracy C, et al. Psychological effects of SARS on hospital staff: survey of a large tertiary care institution. *CMAJ* 2004;170(5):793-8.
14. Chua SE, Cheung V, Cheung C, et al. Psychological effects of SARS outbreak in Hong Kong on high risk health care workers. *Can J Psychiatry* 2004;49(6):391-3.
15. Bai Y, Lin CC, Lin CY, Chen JY, Chue CM, Chou P. Survey of stress reactions among health care workers involved with the SARS outbreak. *Psychiatr Serv* 2004;55(9):1055-7.
16. Wong, TW, Yau, JKY, Chan, CLW, et al. Psychological impact of severe acute respiratory syndrome outbreak on health care workers in an emergency department and how they cope. *Eur J Emerg Med* 2005;12(1):13-8.
17. Lin CY, Peng YC, Wu YH, Chang J, Chan CH, Yang DY. The psychological effect of severe acute respiratory syndrome on emergency staff. *Emerg Med J* 2007;24(1):12-7.
18. Goulia P, Mantas C, Dimitroula D, Mantis D, Hyphantis T. General hospital staff worries, perceived sufficiency of information and associated psychological distress during the A/H1N1 influenza pandemic. *BMC Infect Dis* 2010;10:322.



- 1  
2  
3 19. Mohammed AG, Turki A, Abdulla A. et al. Perception and attitude of emergency room  
4  
5 resident physicians toward the Middle East Respiratory Syndrome outbreak. *Emerg Med Int*  
6  
7 2017;2017:6978256. doi: 10.1155/2017/6978256.  
8  
9
- 10 20. Lancee WJ, Maunder RG, Goldbloom DS. Prevalence of psychiatric disorders among  
11  
12 Toronto hospital workers one to two years after SARS outbreak. *Psychiatr*  
13  
14 *Serv* 2008;59(1):91–5.  
15  
16
- 17 21. Maunder RG, Lancee WJ, Balderson KE, et al. Long term psychological and occupational  
18  
19 effects of providing hospital health care during SARS outbreak. *Emerg Infect*  
20  
21 *Dis* 2006;12(12):1924–32.  
22  
23
- 24 22. Lai J, Ma S, Wang Y, et al., Factors associated with mental health outcomes among health  
25  
26 care workers exposed to coronavirus disease 2019. *JAMA Network Open* 2020;3(3):e203976.  
27  
28
- 29 23. Wilder-Smith A, Chiew CJ, Lee VJ. Can we contain the COVID-19 outbreak with the same  
30  
31 measures as for SARS? *Lancet Infect Dis* 2020;20(5):e102-7. doi: 10.1016/S1473-  
32  
33 3099(20)30129-8.  
34
- 35 24. Matrajt L, Leung T. Evaluating the effectiveness of social distancing interventions to delay  
36  
37 or flatten the epidemic curve of coronavirus disease. *Emerg Infect Dis* 2020;26(8) published  
38  
39 online April 28. doi: 10.3201/eid2608.201093.  
40  
41
- 42 25. Mahler J. Epicenter: inside the underfunded, overwhelmed public hospitals that are trying to  
43  
44 save New York. *The New York Times Magazine*, April 19, 2020:24-51.  
45  
46
- 47 26. Kim CS, Lynch JB, Cohen S et al. One academic health system’s early (and ongoing)  
48  
49 experience responding to COVID-19: recommendations from the initial epicenter of the  
50  
51 pandemic in the United States. *Acad Med* 2020; published online April 9.  
52  
53 [10.1097/ACM.0000000000003410](https://doi.org/10.1097/ACM.0000000000003410)  
54  
55  
56  
57  
58  
59  
60

- 1  
2  
3 27. McLeroy KR, Bibeau D, Steckler A, et al. An ecological perspective on health promotion  
4 programs. *Health Educ Q*. 1988;15(4):351–77.  
5  
6  
7  
8 28. Kumar S, Quinn SC, Kim KH, et al. The social ecological model as a framework for  
9 determinants of 2009 H1N1influenzavaccine uptake in the US. *Health Educ Behav*  
10 2012;39(2):229-43. doi:10.1177/1090198111415105  
11  
12  
13  
14 29. Moore M, Cristofalo M, Dotolo D, et al. When high pressure, system constraints, and a social  
15 justice mission collide: a socio-structural analysis of emergency department social work  
16 services. *Soc Sci Med* 2017;178:104-14.  
17  
18  
19  
20  
21 30. Scheuer H, Engstrom A, Thomas P, et al. A comparative effectiveness trial of an  
22 information technology enhanced peer-integrated collaborative care intervention versus  
23 enhanced usual care for US trauma care systems: clinical study protocol. *Contemp Clin*  
24 *Trials* 2020;91(105970). <https://doi.org/10.1016/j.cct.2020.105970>  
25  
26  
27  
28  
29  
30 31. Palinkas LA, Zatzick D. Rapid assessment procedure informed clinical ethnography  
31 (RAPICE) in Pragmatic clinical trials of mental health services implementation: methods and  
32 applied case study. *Admin Policy Ment Health* 2019;46:255-70.  
33  
34  
35  
36  
37 32. Moloney K, Scheuer H, Engstrom A, et al. Experiences and insights from the early US  
38 COVID-19 epicenter: a rapid assessment procedure informed clinical ethnography case  
39 series. *Psychiatry* 2020, in press.  
40  
41  
42  
43  
44 33. Palinkas LA, Prussing E, Reznik VM, Landsverk J. The San Diego East County school  
45 shootings: a qualitative study of community-level post-traumatic stress. *Prehosp Disaster*  
46 *Med* 2004;19(1):113–21.  
47  
48  
49  
50  
51  
52  
53  
54  
55  
56  
57  
58  
59  
60

- 1  
2  
3 34. Zatzick D, Coq N, Frederic J, et al. Psychosocial support training for HIV health care  
4 providers in response to the Haitian earthquake. Consortium of Universities for Global  
5 Health Annual Meeting, University of Washington, Seattle, WA., 2010.  
6  
7  
8  
9  
10 35. HCPro. Case study: Harborview Medical Center's automated sepsis alert system. Nurse  
11 Leader Insider Sept 6, 2018. [https://www.hcpro.com/NRS-331768-868/Case-Study-](https://www.hcpro.com/NRS-331768-868/Case-Study-Harborview-Medical-Centers-Automated-Sepsis-Alert-System.html)  
12 [Harborview-Medical-Centers-Automated-Sepsis-Alert-System.html](https://www.hcpro.com/NRS-331768-868/Case-Study-Harborview-Medical-Centers-Automated-Sepsis-Alert-System.html). (Accessed June 9,  
13 2020).  
14  
15  
16  
17  
18  
19 36. Padgett DK. Qualitative methods in social work research. 3<sup>rd</sup> ed. Los Angeles, CA: Sage;  
20 2017.  
21  
22  
23  
24 37. Miller WL, Crabtree BF. Primary care research: a multimethod typology and qualitative road  
25 map. In: Crabtree BF, Miller WL, eds. Doing qualitative research. Newbury Park, CA: Sage;  
26 1992:3-30.  
27  
28  
29  
30  
31 38. Saldana J. The coding manual for qualitative researchers, 3rd ed. Los Angeles: Sage; 2016.  
32  
33  
34 39. Centers for Disease Control. Social distancing. National Center for Immunization and  
35 Respiratory Diseases (NCIRD), Division of Viral Diseases.  
36 [https://www.cdc.gov/coronavirus/2019-ncov/prevent-getting-sick/social-](https://www.cdc.gov/coronavirus/2019-ncov/prevent-getting-sick/social-distancing.html#:~:text=Social%20distancing%2C%20also%20called%20%E2%80%9Cphysical,both%20indoor%20and%20outdoor%20spaces)  
37 [distancing.html#:~:text=Social%20distancing%2C%20also%20called%20%E2%80%9Cphys](https://www.cdc.gov/coronavirus/2019-ncov/prevent-getting-sick/social-distancing.html#:~:text=Social%20distancing%2C%20also%20called%20%E2%80%9Cphysical,both%20indoor%20and%20outdoor%20spaces)  
38 [ical,both%20indoor%20and%20outdoor%20spaces](https://www.cdc.gov/coronavirus/2019-ncov/prevent-getting-sick/social-distancing.html#:~:text=Social%20distancing%2C%20also%20called%20%E2%80%9Cphysical,both%20indoor%20and%20outdoor%20spaces). (Accessed August 26, 2020).  
39  
40  
41  
42  
43  
44 40. Chen Q, Liang M, Li Y, et al. Mental health care for medical staff in China during the  
45 COVID-19 outbreak. *Lancet Psychiatry* 2020 Apr;7(4):e15-e16. doi: 10.1016/S2215-  
46 0366(20)30078-X.  
47  
48  
49  
50  
51  
52  
53  
54  
55  
56  
57  
58  
59  
60

- 1  
2  
3 41. Barelo S, Palamenghi L, Graffigna G. Burnout and somatic symptoms among frontline  
4  
5 healthcare professionals at the peak of the Italian COVID-19 pandemic. *Psychiatry Res*  
6  
7 2020;290:113129. <https://doi.org/10.1016/j.psychres.2020.113129>  
8  
9  
10 42. Shanafelt T, Ripp J, Trockel M. Understanding and addressing sources of anxiety among  
11  
12 health care professionals during the COVID-19 pandemic. *JAMA* 2020; published online  
13  
14 April 7. doi:10.1001/jama.2020.5893.  
15  
16  
17  
18  
19  
20  
21  
22  
23  
24  
25  
26  
27  
28  
29  
30  
31  
32  
33  
34  
35  
36  
37  
38  
39  
40  
41  
42  
43  
44  
45  
46  
47  
48  
49  
50  
51  
52  
53  
54  
55  
56  
57  
58  
59  
60

1  
2  
3  
4  
5  
6  
7  
8  
9  
10  
11  
12  
13  
14  
15  
16  
17  
18  
19  
20  
21  
22  
23  
24  
25  
26  
27  
28  
29  
30  
31  
32  
33  
34  
35  
36  
37  
38  
39  
40  
41  
42  
43  
44  
45  
46  
47  
48  
49  
50  
51  
52  
53  
54  
55  
56  
57  
58  
59  
60

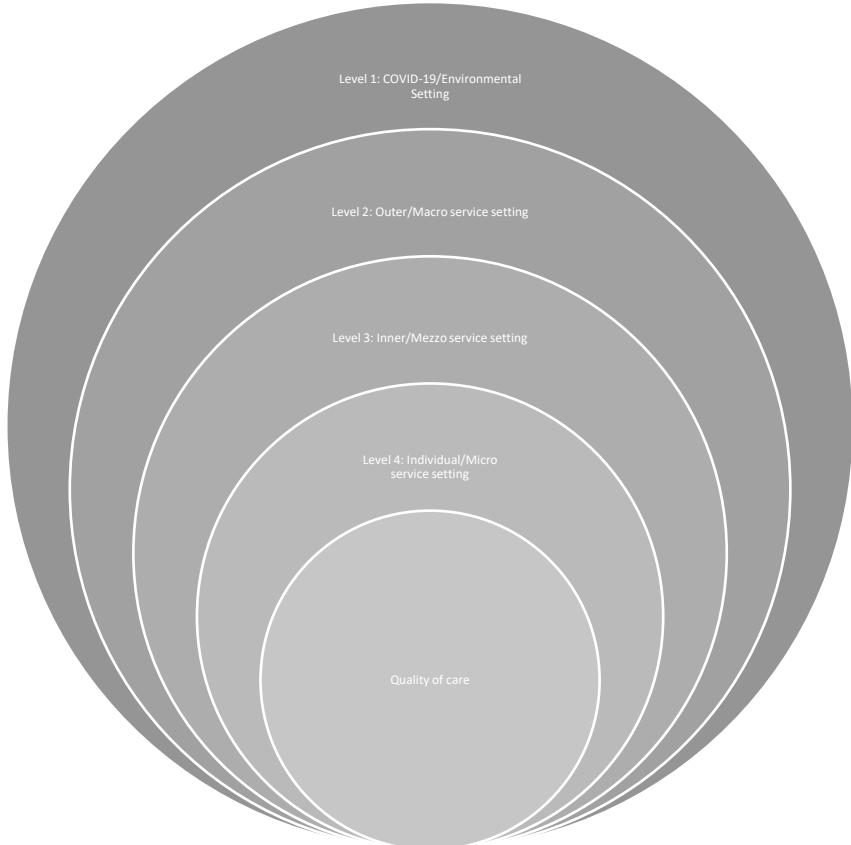

Review only

## Supplement

### Interview Guide for Conducting COVID-19 Debriefs with TSOS Study Team Members

Debriefs will be used to elaborate on information provided by study team members acting as Participant Observers (POs) in the form of jottings and field notes.

1. Can you elaborate on any events that you observed during your shifts in the Trauma Center (TC) that illustrate the impacts on the pandemic on the performance and well-being of TC providers and staff?
2. Can you elaborate on any events that illustrate the impacts of the pandemic on execution of TSOS study tasks (e.g., patient recruitment, screening and referral, data collection)?
3. Have you heard from other TC providers and staff of physical and emotional impacts of additional workload?
4. Can you elaborate on any observed impacts of the pandemic on provider interactions with patients, family members and other providers?
5. Have you observed and/or heard about instances of strategies used by TC providers to cope with the increased personal and professional demands imposed by the pandemic?
6. Have the demands for health care delivery in the TC produced by the pandemic generated any ethical tensions among providers and staff?
7. Do you have any suggestions for services required to address psychosocial needs of providers resulting from increased demands associated with the pandemic?
8. Have you heard any suggestions for services required to address psychosocial needs of providers resulting from increased demands associated with the pandemic from your colleagues?

## Standards for Reporting Qualitative Research (SRQR)\*

<http://www.equator-network.org/reporting-guidelines/srqr/>

Page/line no(s).

### Title and abstract

|                                                                                                                                                                                                                                                              |     |
|--------------------------------------------------------------------------------------------------------------------------------------------------------------------------------------------------------------------------------------------------------------|-----|
| <p><b>Title</b> - Concise description of the nature and topic of the study Identifying the study as qualitative or indicating the approach (e.g., ethnography, grounded theory) or data collection methods (e.g., interview, focus group) is recommended</p> | 1   |
| <p><b>Abstract</b> - Summary of key elements of the study using the abstract format of the intended publication; typically includes background, purpose, methods, results, and conclusions</p>                                                               | 3-4 |

### Introduction

|                                                                                                                                                                     |     |
|---------------------------------------------------------------------------------------------------------------------------------------------------------------------|-----|
| <p><b>Problem formulation</b> - Description and significance of the problem/phenomenon studied; review of relevant theory and empirical work; problem statement</p> | 6-8 |
| <p><b>Purpose or research question</b> - Purpose of the study and specific objectives or questions</p>                                                              | 8   |

### Methods

|                                                                                                                                                                                                                                                                                                                                                                                                             |      |
|-------------------------------------------------------------------------------------------------------------------------------------------------------------------------------------------------------------------------------------------------------------------------------------------------------------------------------------------------------------------------------------------------------------|------|
| <p><b>Qualitative approach and research paradigm</b> - Qualitative approach (e.g., ethnography, grounded theory, case study, phenomenology, narrative research) and guiding theory if appropriate; identifying the research paradigm (e.g., postpositivist, constructivist/ interpretivist) is also recommended; rationale**</p>                                                                            | 8-9  |
| <p><b>Researcher characteristics and reflexivity</b> - Researchers' characteristics that may influence the research, including personal attributes, qualifications/experience, relationship with participants, assumptions, and/or presuppositions; potential or actual interaction between researchers' characteristics and the research questions, approach, methods, results, and/or transferability</p> | 9-11 |
| <p><b>Context</b> - Setting/site and salient contextual factors; rationale**</p>                                                                                                                                                                                                                                                                                                                            | 9    |
| <p><b>Sampling strategy</b> - How and why research participants, documents, or events were selected; criteria for deciding when no further sampling was necessary (e.g., sampling saturation); rationale**</p>                                                                                                                                                                                              | 9    |
| <p><b>Ethical issues pertaining to human subjects</b> - Documentation of approval by an appropriate ethics review board and participant consent, or explanation for lack thereof; other confidentiality and data security issues</p>                                                                                                                                                                        | 9-10 |
| <p><b>Data collection methods</b> - Types of data collected; details of data collection procedures including (as appropriate) start and stop dates of data collection and analysis, iterative process, triangulation of sources/methods, and modification of procedures in response to evolving study findings; rationale**</p>                                                                             | 10   |

|                       |                                                                                                                                                                                                                                                       |       |
|-----------------------|-------------------------------------------------------------------------------------------------------------------------------------------------------------------------------------------------------------------------------------------------------|-------|
| 1<br>2<br>3<br>4<br>5 | <b>Data collection instruments and technologies</b> - Description of instruments (e.g., interview guides, questionnaires) and devices (e.g., audio recorders) used for data collection; if/how the instrument(s) changed over the course of the study | 10    |
| 6<br>7<br>8           | <b>Units of study</b> - Number and relevant characteristics of participants, documents, or events included in the study; level of participation (could be reported in results)                                                                        | 9     |
| 9<br>10<br>11<br>12   | <b>Data processing</b> - Methods for processing data prior to and during analysis, including transcription, data entry, data management and security, verification of data integrity, data coding, and anonymization/de-identification of excerpts    | 10-11 |
| 13<br>14<br>15<br>16  | <b>Data analysis</b> - Process by which inferences, themes, etc., were identified and developed, including the researchers involved in data analysis; usually references a specific paradigm or approach; rationale**                                 | 10-11 |
| 17<br>18<br>19<br>20  | <b>Techniques to enhance trustworthiness</b> - Techniques to enhance trustworthiness and credibility of data analysis (e.g., member checking, audit trail, triangulation); rationale**                                                                | 10-11 |

### Results/findings

|                      |                                                                                                                                                                                                   |            |
|----------------------|---------------------------------------------------------------------------------------------------------------------------------------------------------------------------------------------------|------------|
| 23<br>24<br>25<br>26 | <b>Synthesis and interpretation</b> - Main findings (e.g., interpretations, inferences, and themes); might include development of a theory or model, or integration with prior research or theory | 11-19      |
| 27<br>28<br>29       | <b>Links to empirical data</b> - Evidence (e.g., quotes, field notes, text excerpts, photographs) to substantiate analytic findings                                                               | tables 1-4 |

### Discussion

|                                  |                                                                                                                                                                                                                                                                                                                                                                                                             |       |
|----------------------------------|-------------------------------------------------------------------------------------------------------------------------------------------------------------------------------------------------------------------------------------------------------------------------------------------------------------------------------------------------------------------------------------------------------------|-------|
| 32<br>33<br>34<br>35<br>36<br>37 | <b>Integration with prior work, implications, transferability, and contribution(s) to the field</b> - Short summary of main findings; explanation of how findings and conclusions connect to, support, elaborate on, or challenge conclusions of earlier scholarship; discussion of scope of application/generalizability; identification of unique contribution(s) to scholarship in a discipline or field | 19-22 |
| 38<br>39                         | <b>Limitations</b> - Trustworthiness and limitations of findings                                                                                                                                                                                                                                                                                                                                            | 20-22 |

### Other

|                |                                                                                                                                               |       |
|----------------|-----------------------------------------------------------------------------------------------------------------------------------------------|-------|
| 42<br>43<br>44 | <b>Conflicts of interest</b> - Potential sources of influence or perceived influence on study conduct and conclusions; how these were managed | 24    |
| 45<br>46       | <b>Funding</b> - Sources of funding and other support; role of funders in data collection, interpretation, and reporting                      | 23-24 |

\*The authors created the SRQR by searching the literature to identify guidelines, reporting standards, and critical appraisal criteria for qualitative research; reviewing the reference lists of retrieved sources; and contacting experts to gain feedback. The SRQR aims to improve the transparency of all aspects of qualitative research by providing clear standards for reporting qualitative research.



1  
2  
3  
4  
5  
6  
7  
8  
9  
10  
11  
12  
13  
14  
15  
16  
17  
18  
19  
20  
21  
22  
23  
24  
25  
26  
27  
28  
29  
30  
31  
32  
33  
34  
35  
36  
37  
38  
39  
40  
41  
42  
43  
44  
45  
46  
47  
48  
49  
50  
51  
52  
53  
54  
55  
56  
57  
58  
59  
60

\*\*The rationale should briefly discuss the justification for choosing that theory, approach, method, or technique rather than other options available, the assumptions and limitations implicit in those choices, and how those choices influence study conclusions and transferability. As appropriate, the rationale for several items might be discussed together.

**Reference:**

O'Brien BC, Harris IB, Beckman TJ, Reed DA, Cook DA. **Standards for reporting qualitative research: a synthesis of recommendations.** *Academic Medicine*, Vol. 89, No. 9 / Sept 2014  
DOI: 10.1097/ACM.0000000000000388

For peer review only

# BMJ Open

## A Rapid Ethnographic Assessment of the COVID-19 Pandemic April 2020 "Surge" and its Impact on Service Delivery in an Acute Care Medical Emergency Department and Trauma Center

|                                 |                                                                                                                                                                                                                                                                                                                                                                                                                                                                                                                                                                                                                                                                               |
|---------------------------------|-------------------------------------------------------------------------------------------------------------------------------------------------------------------------------------------------------------------------------------------------------------------------------------------------------------------------------------------------------------------------------------------------------------------------------------------------------------------------------------------------------------------------------------------------------------------------------------------------------------------------------------------------------------------------------|
| Journal:                        | <i>BMJ Open</i>                                                                                                                                                                                                                                                                                                                                                                                                                                                                                                                                                                                                                                                               |
| Manuscript ID                   | bmjopen-2020-041772.R2                                                                                                                                                                                                                                                                                                                                                                                                                                                                                                                                                                                                                                                        |
| Article Type:                   | Original research                                                                                                                                                                                                                                                                                                                                                                                                                                                                                                                                                                                                                                                             |
| Date Submitted by the Author:   | 23-Sep-2020                                                                                                                                                                                                                                                                                                                                                                                                                                                                                                                                                                                                                                                                   |
| Complete List of Authors:       | Palinkas, Lawrence A.; University of Southern California, Suzanne Dworak-Peck School of Social Work<br>Whiteside, Lauren ; University of Washington School of Medicine, Emergency Medicine<br>Nehra, Deepika; University of Washington School of Medicine, Surgery<br>Engstrom, Allison ; University of Washington School of Medicine, Psychiatry & Behavioral Sciences<br>Taylor, Mark; Harborview Medical Center, Division of Trauma, Burn and Critical Care Surgery<br>Moloney, Kathleen; University of Washington School of Medicine, Psychiatry & Behavioral Sciences<br>Zatzick, Douglas; University of Washington School of Medicine, Psychiatry & Behavioral Sciences |
| <b>Primary Subject Heading</b>: | Emergency medicine                                                                                                                                                                                                                                                                                                                                                                                                                                                                                                                                                                                                                                                            |
| Secondary Subject Heading:      | Surgery, Mental health                                                                                                                                                                                                                                                                                                                                                                                                                                                                                                                                                                                                                                                        |
| Keywords:                       | ACCIDENT & EMERGENCY MEDICINE, ORTHOPAEDIC & TRAUMA SURGERY, INFECTIOUS DISEASES, Adult psychiatry < PSYCHIATRY, Public health < INFECTIOUS DISEASES, Trauma management < ORTHOPAEDIC & TRAUMA SURGERY                                                                                                                                                                                                                                                                                                                                                                                                                                                                        |
|                                 |                                                                                                                                                                                                                                                                                                                                                                                                                                                                                                                                                                                                                                                                               |

SCHOLARONE™  
Manuscripts



I, the Submitting Author has the right to grant and does grant on behalf of all authors of the Work (as defined in the below author licence), an exclusive licence and/or a non-exclusive licence for contributions from authors who are: i) UK Crown employees; ii) where BMJ has agreed a CC-BY licence shall apply, and/or iii) in accordance with the terms applicable for US Federal Government officers or employees acting as part of their official duties; on a worldwide, perpetual, irrevocable, royalty-free basis to BMJ Publishing Group Ltd ("BMJ") its licensees and where the relevant Journal is co-owned by BMJ to the co-owners of the Journal, to publish the Work in this journal and any other BMJ products and to exploit all rights, as set out in our [licence](#).

The Submitting Author accepts and understands that any supply made under these terms is made by BMJ to the Submitting Author unless you are acting as an employee on behalf of your employer or a postgraduate student of an affiliated institution which is paying any applicable article publishing charge ("APC") for Open Access articles. Where the Submitting Author wishes to make the Work available on an Open Access basis (and intends to pay the relevant APC), the terms of reuse of such Open Access shall be governed by a Creative Commons licence – details of these licences and which [Creative Commons](#) licence will apply to this Work are set out in our licence referred to above.

Other than as permitted in any relevant BMJ Author's Self Archiving Policies, I confirm this Work has not been accepted for publication elsewhere, is not being considered for publication elsewhere and does not duplicate material already published. I confirm all authors consent to publication of this Work and authorise the granting of this licence.

1  
2  
3 **A Rapid Ethnographic Assessment of the COVID-19 Pandemic April 2020 “Surge” and its**  
4 **Impact on Service Delivery in an Acute Care Medical Emergency Department and Trauma**  
5  
6  
7 **Center**  
8  
9

10  
11  
12 Lawrence A. Palinkas, Lauren Whiteside, Deepika Nehra, Allison Engstrom, Mark Taylor,  
13  
14 Kathleen Moloney, Douglas Zatzick  
15  
16

17  
18  
19 **Department of Children, Youth and Families, School of Social Work, University of**  
20 **Southern California, Los Angeles, CA, USA (Prof L Palinkas PhD, palinkas@usc.edu);**  
21  
22 **Department of Emergency Medicine, University of Washington School of Medicine, Seattle,**  
23 **WA, USA (L Whiteside MD, laurenkw@uw.edu); Department of Surgery, University of**  
24 **Washington School of Medicine, Seattle, WA, USA (D Nehra MD, deepikan@uw.edu);**  
25  
26 **Department of Psychiatry and Behavioral Sciences, University of Washington School of**  
27 **Medicine, Seattle, WA, USA (A Engstrom MSW, alliengs@uw.edu; K Moloney BA,**  
28 **kmoloney@uw.edu; Prof D Zatzick MD, dzatzick@uw.edu); Division of Trauma, Burn and**  
29 **Critical Care Surgery, Harborview Medical Center, Seattle, WA, USA (M Taylor RN);**  
30  
31 **Harborview Injury Prevention and Research Center, University of Washington School of**  
32 **Medicine, Seattle, WA, USA (L Whiteside MD, Prof D Zatzick MD)**  
33  
34  
35  
36  
37  
38  
39  
40  
41  
42  
43  
44

45  
46 Address Correspondence to: Lawrence A. Palinkas, Ph.D., Suzanne Dworak-Peck School of  
47  
48 Social Work, University of Southern California, 669 W. 34<sup>th</sup> Street, Los Angeles, CA 90089-  
49  
50 0411. Telephone 858-922-7265, FAX 213-740-0789, email Palinkas@usc.edu  
51

52  
53 <https://orcid.org/0000-0003-0974-7330>  
54  
55  
56  
57  
58  
59

## ABSTRACT

**Objectives:** Assess the impacts of the COVID-19 pandemic on service delivery by front-line health care providers in acute care medical and emergency department settings and identify strategies used to cope with pandemic-related physical and mental health demands.

**Design:** Rapid clinical ethnography of patient-provider encounters during an initial pandemic “surge” conducted by a team of clinician-researchers using a structured protocol for qualitative data collection and analysis.

**Setting:** Level 1 trauma center at Harborview Hospital in Seattle Washington in April 2020.

**Participants:** Front-line clinical providers serving as participant observers during performance of their clinical duties recorded observations and summaries of conversations with other providers and patients.

**Results:** We identified four different kinds of impacts: procedural, provider, patient, and overall. Each impact highlighted two or more levels of a socio-ecological model of services delivery: 1) the epidemiology of COVID-19, 2) outer setting, 3) inner or organizational setting, and 4) individual patient and provider. Despite significant changes in procedures that included COVID-19 screening of all admitted patients, social distancing and use of PPE, as well as changes in patient and provider behavior, the overall impact of the pandemic on the emergency department and acute care service delivery was minimal. This is attributed to having a smaller surge than expected, a quick response by the healthcare system to anticipated demands for service delivery and protection of patients and providers, adequate supplies, and high provider morale.

**Conclusions:** Although limited to one setting in one healthcare system in one community, the findings offer some important lessons for healthcare systems that have yet to be impacted as well as systems that have been more severely impacted. Each of the socio-ecological framework

1  
2  
3 levels were found to impact service delivery to patients, and variations at each of these levels  
4  
5 account for variations in that quality of care globally.  
6  
7  
8  
9  
10  
11  
12  
13  
14  
15  
16  
17  
18  
19  
20  
21  
22  
23  
24  
25  
26  
27  
28  
29  
30  
31  
32  
33  
34  
35  
36  
37  
38  
39  
40  
41  
42  
43  
44  
45  
46  
47  
48  
49  
50  
51  
52  
53  
54  
55  
56  
57  
58  
59  
60

For peer review only

## STRENGTHS AND LIMITATIONS OF THIS STUDY

- We conducted a rapid clinical ethnography of patient-provider encounters during an initial COVID-19 pandemic “surge” in Seattle Washington to assess the impacts on service delivery by front-line health care providers in acute care medical and emergency department settings and identify strategies used to cope with pandemic-related physical and mental health demands.
- The COVID-19 outbreak resulted in significant changes in acute care clinical procedures, the behaviors of patients and providers, and overall healthcare system performance that were influenced by four different levels of a socio-ecological model of service delivery at a healthcare system that was one of the first in the United States to be impacted by the pandemic.
- Providers reported widespread anxiety related to infection and transmission of COVID-19 to family members, along with depression related to perceived limitations to delivering care and stress related to the pandemic’s financial impacts and prolonged isolation and confinement.
- Providers also reported widespread use of coping strategies and resources to prevent disease spread and deliver high quality healthcare.
- Although limited to one setting in a single US healthcare system where the impacts associated with the pandemic have not been as severe to date as has been the case elsewhere, the findings also offer important lessons for healthcare system providers responding to the COVID-19 pandemic in other settings across the globe.

## INTRODUCTION

In January of 2020, the World Health Organization announced the emergence of a novel coronavirus (COVID-19) in Wuhan, China.<sup>1</sup> Since then, COVID-19 has become a global pandemic on a scale not seen since the 1918 influenza pandemic, which led to an estimated 50,000,000 deaths.<sup>2</sup> As of August 28, 2020, there were over 24.5 million confirmed cases of COVID-19 and 832,748 deaths across the globe; the United States is perhaps the most severely impacted nation with more than 5.8 million confirmed cases and 181,022 deaths.<sup>3</sup> In most states, all non-essential businesses and services were closed and employees were laid off or furloughed, resulting in a national unemployment rate of 14.7 percent in April 2020.<sup>4</sup> Social distancing and use of face masks, closure of non-essential businesses, and mandated quarantines and sheltering in place have been used to control the spread of the disease<sup>5</sup>

Along with other forms of natural disasters and acts of terrorism, infectious disease outbreaks or pandemics often result in a surge in demand for medical care, beginning with emergency departments (ED).<sup>6</sup> Health care systems generally plan responses to such surges by having a pandemic preparedness plan in place for triaging and caring for exposed patients. However, studies that have examined the impact of infectious disease outbreaks on service delivery have generally been retrospective and focused on patterns of admissions and discharges in EDs.<sup>6-8</sup> To date, there have been no studies conducted during a pandemic that have focused on the challenges to delivering acute care services and the extent to which these challenges were addressed by system policies and individual provider practices.

One of the potential influences of infectious disease outbreaks on service delivery in acute care settings is diminished performance due to stress and decrements in mental health. Burnout in health care professionals is frequently associated with poor-quality care.<sup>9,10</sup> Front-line



1  
2  
3 health care providers currently responding to the exponential increase in demands for care  
4 associated with the COVID-19 pandemic share many of the same risk factors for adverse mental  
5 health outcomes as those responding to other forms of disaster.<sup>6,11,12</sup> Several studies of infectious  
6 disease outbreaks, including the 2003 SARS outbreaks in Asia and Canada and the 2012 MERS  
7 outbreak in Saudi Arabia, have documented elevated levels of stress, anxiety, depression and  
8 posttraumatic stress disorder,<sup>13-19</sup> which often persist years after the outbreak.<sup>20,21</sup> Lack of social  
9 support and communication, maladaptive coping, and lack of training were important risk factors  
10 for developing negative psychological outcomes across all types of disasters.  
11  
12  
13  
14  
15  
16  
17  
18  
19  
20

21  
22 However, the current COVID-19 pandemic is unique in several respects. The number of  
23 cases testing positive for the novel coronavirus and the number of hospital admissions and deaths  
24 has exceeded that of previous respiratory disease pandemics, including SARS and MERS, and  
25 differs from these pandemics in terms of infectious period, transmissibility, clinical severity, and  
26 extent of community spread.<sup>22</sup> In an effort to “flatten the curve” of disease transmission,  
27 morbidity and mortality, health care providers will be exposed for a longer period of time than is  
28 the case in other pandemics<sup>23</sup> Front-line providers are confronting the possibility of becoming  
29 infected themselves, thereby increasing the risk of coronavirus-related morbidity and mortality,  
30 and preventive measures such as social distancing will likely impact both personal and  
31 professional behaviors. A recently published investigation of mental health outcomes among  
32 health care workers in Wuhan, China found that engagement in direct diagnosis, treatment and  
33 care of patients with COVID-19 was associated with a higher risk of symptoms of depression,  
34 anxiety, insomnia, and distress.<sup>24</sup> Although these features of the current pandemic have been  
35 prominent in the news media,<sup>25</sup> to date, there have been no systematic studies of these impacts on  
36 service delivery. Moreover, the focus of media attention has been on health care systems in  
37  
38  
39  
40  
41  
42  
43  
44  
45  
46  
47  
48  
49  
50  
51  
52  
53  
54  
55  
56  
57  
58  
59  
60

1  
2  
3 locations like New York City and in Spain and Italy that have been most severely impacted by  
4  
5 the number of patients testing positive for COVID-19. Little is known of its impacts on  
6  
7 healthcare systems in communities where the outbreak has been less dramatic to date and how  
8  
9 front-line providers in these systems are coping with these impacts.  
10  
11

12 To address the lack of information on these issues, we used a novel technique for  
13  
14 conducting a rapid ethnographic assessment of the impacts of the COVID-19 pandemic on  
15  
16 physicians and staff of a Level 1 trauma center of Harborview Medical Center in Seattle  
17  
18 Washington that was among the first in the United States to be impacted by the pandemic.<sup>26</sup> Our  
19  
20 study had two aims: 1) assess the impacts of the COVID-19 pandemic on service delivery by  
21  
22 front-line health care providers working in acute care medical and emergency department  
23  
24 settings at the trauma center; and 2) identify strategies being used by these providers to cope with  
25  
26 the increased physical and mental health demands associated with the pandemic. Our  
27  
28 examination of impacts and strategies was guided by a conceptual framework grounded in the  
29  
30 social-ecological model of behavior. This model argues that individual behavior is shaped by  
31  
32 factors at multiple levels, including institutional, community, and policy levels in addition to  
33  
34 intrapersonal and interpersonal levels.<sup>27</sup> In this instance, the individual behavior is that of the  
35  
36 providers and patients that define the quality of care provided by one individual (the health care  
37  
38 provider) and received by another individual (the patient).<sup>28</sup> The social-ecological model has  
39  
40 been also used in other studies of health services delivery in emergency department settings.<sup>29</sup>  
41  
42  
43  
44  
45

## 46 **METHODS**

### 47 **Design Overview**

48  
49 The investigation reported here was embedded within a larger randomized comparative  
50  
51 effectiveness trial of the impact of a peer-integrated acute care to primary care and community  
52  
53  
54  
55  
56  
57  
58  
59  
60

1  
2  
3 care coordination intervention.<sup>30</sup> To assess implementation of the evidence-based interventions,  
4  
5 we utilized a mixed methods protocol that incorporates principles of Rapid Assessment  
6  
7 Procedures and Clinical Ethnography.<sup>31</sup> The Rapid Assessment Procedure Informed Clinical  
8  
9 Ethnography (RAPICE) approach was previously utilized to describe primary and secondary  
10  
11 COVID-19 preventive interventions, as well as ethical tensions and stepped coping strategies in  
12  
13 the early days and weeks of the pandemic.<sup>32</sup> In the study reported here, RAPICE was utilized  
14  
15 because the research team had already been trained in its use and had collected ethnographic data  
16  
17 at the trauma center related to the parent study prior to the COVID-19 outbreak,<sup>31</sup> it was  
18  
19 originally developed as a tool to iteratively assess and inform care delivery during mass violence  
20  
21 events<sup>33</sup> and natural disasters,<sup>34</sup> it could be implemented with minimal additional resources  
22  
23 within the framework of the larger comparative effectiveness trial, it is a minimally invasive  
24  
25 form of data collection that can be used when priority was given to service delivery, and it can  
26  
27 provide a depth of understanding to the challenges faced in service delivery not available from  
28  
29 quantitative surveys.  
30  
31  
32  
33  
34

### 35 **Participants**

36  
37 Study participants were patients and providers who interacted with or otherwise were observed  
38  
39 by members of the parent study research team (n = 5) engaged in the delivery of care within the  
40  
41 Trauma Center at Harborview Medical Center during a COVID-19-related April 2020 “surge”.  
42  
43 The facility is the only designated Level I trauma and burn center in Washington state and is the  
44  
45 regional trauma and burn referral center for Alaska, Montana, and Idaho. The 412-bed facility  
46  
47 has around 17,000 admissions, 259,000 clinic visits, and 59,000 ED visits annually<sup>35</sup> During the  
48  
49 month of April 2020, the hospital had 1,089 total admissions. On average, the daily COVID-19  
50  
51 census was 18 patients (range = 10-26 patients). Research team members included a trauma  
52  
53  
54  
55  
56  
57  
58  
59  
60

1  
2  
3 surgeon, emergency department physician, trauma center nurse manager, acute care medical  
4 consultation-liaison psychiatrist, and social worker, each of whom served as participant  
5  
6 observers (POs) in the trauma center. Each team member had an opportunity to observe various  
7  
8 components of acute care delivery, from triage management and emergency care to surgical  
9  
10 procedures, in-hospital mental health service delivery, and trauma center to primary care  
11  
12 linkages. Participants were given training by the first author to assume the role of POs during  
13  
14 their shifts in the trauma center. This training included the principles and practice of RAPICE,  
15  
16 what information to collect and how, (i.e., through observation and informal interviews with  
17  
18 other providers and staff), how to record information collected in field jottings and field notes,  
19  
20 and how to acknowledge and manage the researcher's subjectivity through reflexivity, or  
21  
22 systematic awareness of the potential for bias and distortion.<sup>36</sup>  
23  
24  
25  
26  
27

### 28 **Data Collection**

29  
30 Data included observations and interactions with patients and other providers made while  
31  
32 engaged in delivering routine clinical services. POs were charged with observing and recording  
33  
34 events that illustrate the impacts of the pandemic on provider performance and well-being and on  
35  
36 provider interactions with patients, family members and other providers. They also informally  
37  
38 collected reports from other acute care providers and staff of physical and emotional impacts of  
39  
40 additional workload. Finally, POs were asked to obtain information on strategies used by  
41  
42 providers to cope with the increased personal and professional demands imposed by the  
43  
44 pandemic. The trauma center providers and staff were aware of the participant observer's role as  
45  
46 researchers involved in the parent study and the focus of their investigation per approval by the  
47  
48 IRBs of the University of Washington and University of Southern California (UP-20-00298)  
49  
50  
51  
52  
53  
54  
55  
56  
57  
58  
59  
60

1  
2  
3 prior to the initiation of the investigation. Informed consent from the participant observers  
4 themselves was obtained from the first author.  
5  
6

7  
8 Information on these observations and interactions were recorded through periodic  
9  
10 jottings summarizing observations and interactions and more detailed field notes that could be  
11 updated each day. Field notes also included impressions of events observed and exchanges with  
12 other providers and staff, as well as preliminary interpretations of the significance of these events  
13 and exchanges. Each PO then participated in a semi-structured debriefing interview with the first  
14 author to clarify and expand upon information contained in jottings and field notes and provide a  
15 preliminary interpretation of their observations and interactions. A copy of the debriefing  
16 interview guide is provided as Supplementary Document 1. Debriefs lasting between 50 and 60  
17 minutes in duration were conducted using the Zoom video conferencing platform, recorded, and  
18 transcribed for analysis. Written copies of debriefs were then provided to the POs, enabling them  
19 to revise or elaborate on comments made.  
20  
21  
22  
23  
24  
25  
26  
27  
28  
29  
30  
31

### 32 33 **Data Analysis** 34

35 The first author reviewed all data collected by the POs, and performed a preliminary analysis,  
36 using the immersions/crystallization<sup>37</sup> and focused thematic analysis techniques<sup>38</sup> that are part of  
37 the RAPICE methodology.<sup>31</sup> The first author reviewed the data and then queried each PO during  
38 the debrief to gain more insight into the data and its context and to obtain a preliminary  
39 interpretation of the meaning and significance of data provided by the PO. Two hundred and  
40 sixty-eight double-spaced pages of field notes, jottings, memos, documents and transcripts of the  
41 member-checking debriefing interviews collected over a four-week period were then coded by  
42 the first author to condense the data into analyzable units. Segments of text ranging from a  
43 phrase to several paragraphs were assigned codes based on a priori (e.g., from a semi-structured  
44  
45  
46  
47  
48  
49  
50  
51  
52  
53  
54  
55  
56  
57  
58  
59  
60

1  
2  
3 interview guide) or emergent themes (also known as open coding). Following the open coding,  
4  
5 codes were assigned to describe connections between and within categories (also known as axial  
6  
7 coding). Based on these codes, QSR NVivo 12 was used to generate a series of themes arranged  
8  
9 in a treelike structure connecting text segments grouped into separate categories of codes or  
10  
11 “nodes.” Consistent with previously explicated RAPICE methods,<sup>31</sup> a discussion then ensued  
12  
13 until both the POs and the first author reached consensus as to the meaning and significance of  
14  
15 the data.  
16  
17

### 18 19 **Patient and Public Involvement**

20  
21 Patients and the public were not involved in the design or execution of this study.  
22  
23

### 24 25 **RESULTS**

26  
27 Overall, our analysis revealed four broad impacts of the COVID-19 pandemic on service  
28  
29 delivery: 1) impacts on procedures, 2) impacts on providers, 3) impacts on patients, and 4)  
30  
31 overall impacts on quality of care. Each of these themes are linked together at four broad levels  
32  
33 of a socio-ecological model of influences on patient care, illustrated in Figure 1 below.  
34

35  
36 Figure 1 about here

37  
38 The outermost or environmental level is dictated by the novel coronavirus and its global  
39  
40 spread and includes the nature of virus transmission; social and biological characteristics of risk  
41  
42 and resilience; public health guidelines for preventing the spread of infection; risk of re-  
43  
44 infection; disease sequelae; survival rates; and clinical outcomes. The second level is the external  
45  
46 or macro service setting that has dictated the supply (e.g., availability of personnel and  
47  
48 equipment like PPE and ventilators) and demand (e.g., number of patients seen overall, patients  
49  
50 who test positive for COVID-19 or are under investigation for having COVID-19, and the nature  
51  
52 of the problems seen). The third level is the internal or mezzo service setting of the healthcare  
53  
54  
55  
56  
57  
58  
59  
60

system and includes the availability of beds to handle increased demand, healthcare system guidelines and policies put in place to ensure the safety and health of both patients and providers, and the transition to delivery of services using telehealth platforms to reduce the need for patients to be physically present at the hospital. The fourth level is that of the individual provider and patient or micro service setting and includes variations in the demands placed on individuals that include the anxiety related to fear of infection, depression, ethical conflicts, social tension, and stress, and the resources and strategies used by individuals to cope with these demands.

### Theme 1. Impacts on Procedures

The first theme of impacts on procedures and quality of care can be divided into three subthemes: 1) challenges related to testing patients for COVID-19; 2) altering procedures to insure adequate social distancing; and 3) use of PPE. Each of these represent the interconnections between Levels 1 to 4 described above and are examined in detail below.

Illustrative quotations from fieldnotes and interviews for each subtheme are provided in Table 1.

**Table 1. Impacts of COVID-19 pandemic on clinical procedures**

| Subtheme                  | Level | Illustrative quote                                                                                                                                                                                                                                                                                                                                                                                                                                                                                                                                                                                                                                                                                                                                                                                                                                                  |
|---------------------------|-------|---------------------------------------------------------------------------------------------------------------------------------------------------------------------------------------------------------------------------------------------------------------------------------------------------------------------------------------------------------------------------------------------------------------------------------------------------------------------------------------------------------------------------------------------------------------------------------------------------------------------------------------------------------------------------------------------------------------------------------------------------------------------------------------------------------------------------------------------------------------------|
| <b>COVID testing</b>      |       |                                                                                                                                                                                                                                                                                                                                                                                                                                                                                                                                                                                                                                                                                                                                                                                                                                                                     |
| Delay in care             | 1,3   | <i>Any trauma who is intubated (which is most of our sick trauma patients) is considered COVID positive coming in and we have to perform the initial resuscitation and evaluation in airborne precautions and limit people/supplies in the room. This can sometimes cause a delay in some of the care. -fieldnote</i>                                                                                                                                                                                                                                                                                                                                                                                                                                                                                                                                               |
| Impact on quality of care | 1,2,3 | <i>... sometimes patients have you know what normally we would consider to be relatively urgent things and we would just get the patient down to the OR quickly because there is the potential for them to decompensate. They might not be dying in front of you, but there is the potential for them to decompensate. And that sort of decision of like 'hey should we like in this situation to preserve PPE, like get this COVID test and wait because we think the patient's kind of going to be able to make it a few hours without decompensating,' that I find kind of challenging because it feels like you're sometimes providing maybe not the best care because normally you would go straight down to the operating room but there's also all these layers of if I do that, you know it uses this much more PPE and what not. -debriefing interview</i> |
| Guideline uncertainty     | 1,3,4 | <i>Constantly evolving pathways for COVID testing and clearance which is understandable but no clear consensus on a day to day basis, or at least a lot of confusion. -fieldnote</i>                                                                                                                                                                                                                                                                                                                                                                                                                                                                                                                                                                                                                                                                                |
| <b>Social distancing</b>  |       |                                                                                                                                                                                                                                                                                                                                                                                                                                                                                                                                                                                                                                                                                                                                                                                                                                                                     |
| Impact on procedures      | 1,3   | <i>I think, you know, we're a teaching hospital so anything that happens, anything that happened, I should say in the past, happened with a large group of people. You know there's the people who are performing the task and then the observers who are learning.</i>                                                                                                                                                                                                                                                                                                                                                                                                                                                                                                                                                                                             |



The observers are no longer present for any of that. And even the activities that are being provided have been rethought to a point where we can pare them down to just the minimum number required. And so, so yes absolutely. There's a significant amount of workflow changes that occurred to minimize the numbers of people that are involved. – debriefing interview

|                                      |       |                                                                                                                                                                                                                                                                                                                                                                                                                                                                                                                                                                                                                         |
|--------------------------------------|-------|-------------------------------------------------------------------------------------------------------------------------------------------------------------------------------------------------------------------------------------------------------------------------------------------------------------------------------------------------------------------------------------------------------------------------------------------------------------------------------------------------------------------------------------------------------------------------------------------------------------------------|
| Reducing patient need to visit ED    | 1,2,3 | Worked with patient to avoid ER a few weeks ago after a fall by coordinating nurse & doctor phone call; resulted in patient creating sling and icing injury. Resolved without visit to ER. Pt needs to go to doctor & physical therapy often for pain management and routine care for chronic conditions. Clinics do not want her coming in because not “absolutely necessary.” -jotting                                                                                                                                                                                                                                |
| Impacts on provider interactions     | 1,3,4 | Also, we note the geography of our ED has changed so keep > 6 feet of space between patients and allow for providers in patient care areas, so providers no longer congregate together in non-clinical spaces and sit separate from nurses which decreases clinical communication. There were no bad outcomes, just notable how much harder it is to communicate as a whole clinical team. -fieldnote                                                                                                                                                                                                                   |
| Reduced presence of family members   | 1,3,4 | And then I really think one of the biggest things that's been sort of hard I think for us as a group and I think for all healthcare providers sort of who are taking care of any patient, COVID positive or not, is that, is the fact that you know we really aren't able to have family members in the hospital almost at all, which is a very different way than we usually practice. And that's been really hard I think on everyone in sort of the hospital but also the patients and their families. -debriefing interview -debriefing interview                                                                   |
| Use of telehealth                    | 1,3,4 | Before, when all this started we were not set up for telehealth in anyway, we did do phone calls that's always been something but it was seen as only, we only did that if there was some really extenuating circumstances, or if something was so minor that it just seemed better to do it over phone. So as soon as really drastic measures were being taken place to call patients like “do you really need this, or can you wait until June”. You know things started to be more and more integrated into the telehealth way and Zoom was being used. -debriefing interview                                        |
| <b>Impact on quality of care</b>     | 3,4   | One of the patients who has a lot of chronic illnesses..., he self-identified as someone whose not a phone person and is, notices himself that as engaged as much and getting distracted over the phone, and just is the kind of person that favors in person contact for a variety of reasons. And so, it really inhibited our work together and that he is less able to get into to a state of readiness to do therapeutic work because he's just distracted and then generally seeming feeling a lot more hopeless. -debriefing interview                                                                            |
| <b>Use of PPE</b>                    |       |                                                                                                                                                                                                                                                                                                                                                                                                                                                                                                                                                                                                                         |
| Impacts on procedures                | 1,3   | It also limits our ability, like we as the attendings don't go into the room. We sort of stand back, not in airborne, N-95 precautions, we sort of stand back to preserve PPE because we usually don't, you know we're not usually the ones like doing stuff to the patient -fieldnote                                                                                                                                                                                                                                                                                                                                  |
| Impact on interactions with patients | 3,4   | I think that some people do feel apprehensive that they can't see your face but also that you know you may be a risk to them, and sort of I feel like sometimes sends that signal even though you're trying to obviously do the right thing and protect them. I mean classically people have worn masks in hospitals when they have been sick, right? I mean that's why we've worn masks, is if you have like a runny nose or a cough or something. Just as an extra layer of protection. So, it's always been like oh stay away from that person with the mask on because they're you know sick. -debriefing interview |
| Challenges in wearing                | 3,4   | I don't know if you've seen these masks, I mean you know, we have the tie masks, they're impossible, like you can't wear them all day and getting them on and off, I got a bunch somewhere, but they're hard to tie, so you're thinking about how to sterilize them, and the, they're tie masks they're not like, they used to have better ear masks but they are conserving those for the patients, those stay on, these, these don't unless you're really good at tying them. -debriefing interview                                                                                                                   |

## COVID-19 testing



1  
2  
3 The implementation of a policy that all patients requiring acute care undergo testing for COVID-  
4 19 because of a need to preserve PPE for confirmed COVID-19 patients or patients at high risk  
5  
6 19 because of a need to preserve PPE for confirmed COVID-19 patients or patients at high risk  
7  
8 for COVID-19 has resulted in delays in getting treatment for often life-threatening conditions.  
9  
10 For patients with severe mental health issues, getting consent to perform testing has been  
11  
12 problematic. Especially challenging for providers has been patients showing symptoms that are  
13  
14 similar to those of COVID-19, such as withdrawal from heroin or other illicit substances.  
15  
16 Although the delays in getting treatment do not appear to have compromised the quality of care  
17  
18 received, providers expressed concern that patients needing urgent but not immediate attention  
19  
20 become sicker while awaiting COVID-19 test results. Experience with guideline implementation  
21  
22 and its effects on workflow and service delivery, along with information from other healthcare  
23  
24 systems, led to changes in guidelines and protocols for COVID-19 screening. Changes in  
25  
26 guidelines resulted in delays in delivering care and confusion over what guidelines were in effect  
27  
28 at any point in time.  
29  
30  
31

### 32 33 Social Distancing

34  
35 According to the Centers for Disease Control, social distancing, also called “physical  
36  
37 distancing,” means keeping a safe space between yourself and other people who are not from  
38  
39 your household.<sup>39</sup> To practice social or physical distancing, the CDC recommends that one stay  
40  
41 at least 6 feet (about 2 arms’ length) from other people who are not from your household in both  
42  
43 indoor and outdoor spaces. Within the trauma center, social distancing included protocols and  
44  
45 procedures designed to minimize person-to-person contact.  
46  
47  
48

49  
50 Imposition of social distancing guidelines for the benefit of both patients and providers  
51  
52 led to several changes in procedures, including reducing the need for patients to come to ED and  
53  
54 suspension of nonessential procedures. Social distancing guidelines also impacted patterns of  
55  
56  
57  
58  
59

1  
2  
3 interactions among providers. Routine interactions such as morning briefings and grand rounds  
4 with residents were either suspended or conducted remotely. Conferences with colleagues  
5 concerning patient clinical status and treatment were altered by requirements for physical  
6 separation (e.g., limiting the number of providers in a patient's room, communicating remotely.  
7  
8  
9  
10  
11

12 Perhaps the greatest impact of social distancing guidelines noted by POs was the  
13 restrictions on the presence of family members. This was especially problematic because the  
14 restrictions deprived patients of essential sources of social and emotional support, making it  
15 difficult for providers to communicate with family members and for family members to be  
16 updated on patient status, and led to some patients dying alone without family members being  
17 present.  
18  
19  
20  
21  
22  
23  
24  
25

26 In some settings like behavioral health and outpatient psychiatry, there was a greater use  
27 of telehealth services. For the most part, these services were provided over the telephone or on  
28 the Zoom platform. Because of social distancing, some behavioral health consultations were  
29 performed without use of standard assessment protocols (i.e., administration of questionnaires to  
30 evaluate mental health status). Moreover, some patients expressed reluctance or unwillingness to  
31 obtain treatment by telephone, making service delivery problematic. This reluctance led to  
32 concerns that such patients were not receiving optimal and necessary services.  
33  
34  
35  
36  
37  
38  
39  
40  
41

#### 42 Use of PPE

43

44 There are several facets of Personal Protective Equipment (PPE) use that were mentioned by  
45 providers, including policies that were designed to preserve the supply of PPEs in units like the  
46 operating rooms, challenges involved in wearing PPEs, including the time involved in “donning  
47 and doffing” which created delays in performing procedures, and the perceptual separation from  
48 patients created by the PPEs. Providers were required to undergo training in the use of PPEs and  
49  
50  
51  
52  
53  
54  
55  
56  
57  
58  
59  
60

were monitored for proper use in the workplace. Some providers commented on the potential risk of infection created by improper use and the unwillingness of other providers to use PPEs in some units prior to the implementation of new guidelines mandating their use that replaced old guidelines that merely recommended their use.

## Theme 2, Impacts on providers

The second major theme related to the impact of the pandemic in general and its impact on service delivery in particular to the providers themselves. This theme was segmented into three distinct subthemes (Table 2): 1) risk of infection; 2) negative impacts; and 3) provider coping strategies and resources.

**Table 2. Impacts of COVID-19 pandemic on health care providers**

| Subtheme                 | Level | Illustrative quote                                                                                                                                                                                                                                                                                                                                                                                                                                                                                                                                                                                                                                                                                         |
|--------------------------|-------|------------------------------------------------------------------------------------------------------------------------------------------------------------------------------------------------------------------------------------------------------------------------------------------------------------------------------------------------------------------------------------------------------------------------------------------------------------------------------------------------------------------------------------------------------------------------------------------------------------------------------------------------------------------------------------------------------------|
| <b>Risk of infection</b> | 1,3,4 | <i>...the kind of thing that would really be unexpected and really upsetting is having evaluated a patient, for instance, this week who was negative and then they [tested positive], and for all of us to hear about that and then have to worry about that. -debriefing interview</i>                                                                                                                                                                                                                                                                                                                                                                                                                    |
| <b>Negative impacts</b>  |       |                                                                                                                                                                                                                                                                                                                                                                                                                                                                                                                                                                                                                                                                                                            |
| Anxiety                  | 1,3,4 | <i>I mean there's a fair bit of anxiety, for sure. I think with regards to, you know exposure, family, sort of uncertainty. And just like trying to do the best you can in a different sort of world, if you want to call it that, with the COVID sort of being the primary thing that comes up every step of the way. Like sometimes you're standing there and you're like oh my God this patient is bleeding to death, can we stop talking about the COVID? You know but it's something that we're just having, having to talk about. I think, I think that the anxiety part. -debriefing interview</i>                                                                                                  |
| Depression               | 3,4   | <i>It's been sad, just the effect that this has had on these 2 patients in particular. One because I feel like that for months and months and months, we've been working together to get out more and to spend more time doing things, but, you know, give them a sense of purpose or satisfaction. It almost hurts them that much more, you know they've been working towards it, both of them had achieved the task of getting out more, so just as they were starting to get it together and like "oh this like really does work and this is really helping" and seeing some improvement and symptoms, and then it being taken away from them is pretty earth shattering. -debriefing interview</i>     |
| Stress                   | 4     | <i>There are providers that are stressed. I mean, it's the COVID-19 stress, it's the daycare stress, unemployment stress, kids not getting jobs. It's a whole morass, as you probably already know. things that are happening to people. -debriefing interview</i>                                                                                                                                                                                                                                                                                                                                                                                                                                         |
| Guilt                    | 4     | <i>Yeah, and I think people feel conflicted that you get to go to work and see your friends and so you get to have those at work and you get to have a conversation with adult friends in person and a lot of people don't get to do that anymore. And that sounds fun... I think there's also this little bit of guilt in I know I told you that [the hospital] is not seeing this deluge of patients and you know, the community, the restaurants are giving out free lunch and local celebrities... have dropped off some food or some free thing to healthcare workers... and you're sort of like well actually we aren't seeing that many patients right now with COVID-19. -debriefing interview</i> |

|                                        |       |                                                                                                                                                                                                                                                                                                                                                                                                                                                                                                                                                                                                                                                                                                                                                                                                                                                                                                                                                                                                                                                                                                          |
|----------------------------------------|-------|----------------------------------------------------------------------------------------------------------------------------------------------------------------------------------------------------------------------------------------------------------------------------------------------------------------------------------------------------------------------------------------------------------------------------------------------------------------------------------------------------------------------------------------------------------------------------------------------------------------------------------------------------------------------------------------------------------------------------------------------------------------------------------------------------------------------------------------------------------------------------------------------------------------------------------------------------------------------------------------------------------------------------------------------------------------------------------------------------------|
| Ethical conflicts                      | 3,4   | <i>I think one of the early discussions we had...we have a program here where we use ECMO for respiratory failure. And one of the early discussions we had here with not just the hospital..., but also with other ECMO centers throughout the Pacific Northwest was what are we going to do in the anticipation of this surge of patients? Does it make sense to utilize a very high resource, you know procedure, for a very, very small number of patients, where a lot of PPE is going to be used and a lot of dedication, a lot of dedicated staff. And at that time, we kind of made the decision that we, that we wouldn't...that did not make sense. That we wouldn't offer that service. As it started to unfold, that, you know the surge that we were anticipating didn't develop quite in the way that we thought it would or we feared that it would, we then kind of, as a group, reinstated the procedure and recognizing that, well it seems like we do have the capacity both in terms of staff and space and with PPE and equipment to provide that service. -debriefing interview</i> |
| Social tension                         | 4     | <i>My colleague that's been here for 15 years, she's great. At the end [of our shift] as we were saying goodbye to her, she asks me to tell her everything you've learned [from this study]. She's pushing me; she said "okay [name removed], so why do you get to do research? That's a pretty privileged thing to do and then why don't you come here [to treat patients], I'm doing this yes you know, and you know it's also like we need people." -debriefing interview</i>                                                                                                                                                                                                                                                                                                                                                                                                                                                                                                                                                                                                                         |
| <b>Coping strategies and resources</b> |       |                                                                                                                                                                                                                                                                                                                                                                                                                                                                                                                                                                                                                                                                                                                                                                                                                                                                                                                                                                                                                                                                                                          |
| Procedural innovations                 | 3,4   | <i>We want to make sure that our outpatients clinic and providers are safe and patients with COVID go to outpatient units and so it's an important workaround but for patients that will have trouble with Telemedicine and Telehealth, it does feel like the emergency department is now not only a safety net but it's sort of the end of the road for a lot of people -debriefing interview</i>                                                                                                                                                                                                                                                                                                                                                                                                                                                                                                                                                                                                                                                                                                       |
| Prevention                             | 1,3,4 | <i>I think most people including myself are going home and just showering and then you know washing the clothes that they were wearing to and from the hospital. And everyone at the hospital has moved to where its just wearing scrubs as soon as they come in. -debriefing interview</i>                                                                                                                                                                                                                                                                                                                                                                                                                                                                                                                                                                                                                                                                                                                                                                                                              |
| Social support                         | 3,4   | <i>The community very much wanted to contribute whatever they could to recognize the work that healthcare is providing for the communities, which has been wonderful. But we want to make sure that information makes it to staff as well. -debriefing interview</i>                                                                                                                                                                                                                                                                                                                                                                                                                                                                                                                                                                                                                                                                                                                                                                                                                                     |
| Mental health services                 | 3,4   | <i>The university had this drop-in session of talk about your concerns and one of my colleagues dropped in and he said that he is saw every healthcare worker has sort of their own piece of the thing that's making their life harder and what he would be most helpful emergency medicine doctors talking about what makes emergency medicine. So, we kind of developed our own faculty we just had like drop-ins in zoom meetings where you could go in and it was free from judgement and you could talk about whatever you needed to talk about. I think a lot of people found those to be helpful and I dropped in a couple times especially kind of early on. -debriefing interview</i>                                                                                                                                                                                                                                                                                                                                                                                                           |
| Information                            | 3,4   | <i>I think knowledge has helped already a lot. In the beginning, again there was so little known about, even the, how the disease was transmitted was very, very little was known in the beginning. There's still some question in that, you know what is considered safe what's not considered safe. What procedures can we perform using this type of PPE versus that type of PPE. I think when staff understand everything that there is to know about a given, you know disease transmission and process, then that makes them a little more comfortable. -debriefing interview</i>                                                                                                                                                                                                                                                                                                                                                                                                                                                                                                                  |
| Self-care                              | 1,3,4 | <i>I think, I think for me what made the difference is being very purposeful with what I've been doing with my time, and I think for the vast majority of humans and providers, we create a system of coping for ourselves and when those traditional means are getting thwarted or changed, we have to find a good replacement for that. And I think that yeah being purposeful that how you're spending your time and customizing it to your needs and what gets you through is important, but I also think that means having the boundaries between work and personal life so that you have the time to, one, think about</i>                                                                                                                                                                                                                                                                                                                                                                                                                                                                         |

---

*what you need to do to get yourself through, and two, actually do those things* -debriefing interview

---

### Risk of infection

The first subtheme was provider assessments of the risk of infection to themselves and to family members. Unlike other healthcare systems where providers have died from COVID-19, there have been no known reported provider deaths in this healthcare system, even though it is widely recognized that some providers have tested positive for COVID-19. Nevertheless, although POs did report instances of a lack of concern by themselves or by others, sometimes reflected in the absence of masks worn in workspaces prior to the establishment of a policy making their use mandatory, they also cited numerous instances of concern about getting infected. These concerns extended to the risk of infecting family members. The risk of infection was associated with factors such as the provider's age, occupation (e.g., anesthesiologists), and work setting (e.g., operating room, ICU).

### Negative impacts

Negative impacts of the pandemic on hospital staff, included anxiety related to the fear of infection to self and family members; feelings of sadness and depression related to separation of family members from dying patients and not being able to deliver necessary care, the experience of ethical tensions related to the perceived risk of coming to work sick and infecting others, engaging in other forms of risk behavior like violating stay at home orders, and the concern that some forms of care are currently being or will likely be rationed; guilt over having the opportunity to interact with colleagues when others must stay at home; interactions with colleagues that highlight undercurrents of social tension related to professional disciplinary differences (e.g., research vs clinical care) or failure to adhere to guidelines regarding distancing;

1  
2  
3 and stress related to other aspects of the pandemic, including financial stability, impacts on loved  
4 ones, and isolation and confinement at place of residence.  
5  
6

### 7 Provider coping strategies and resources

8  
9  
10 A third subtheme reflected different strategies and techniques employed by providers to cope  
11 with changes in service delivery and their impacts on both quality of care and on provider mental  
12 health. Participant observers noted several instances of innovation in performing procedures  
13 while adhering to guidelines intended to protect both providers and patients from infection.  
14  
15 These included adapting procedures for performing psychiatric evaluations for patients and  
16 development of workarounds to ensure service delivery.  
17  
18  
19  
20  
21  
22

23  
24 A second important form of coping revolved around efforts to engage in behaviors and  
25 practices intended to reduce the risk of infection to self and others. These included behaviors at  
26 the workplace (use of homemade gels to clean hands or commercially available disinfectants to  
27 deep-clean workspaces, not wearing street clothes or jewelry), outside of work (changing clothes  
28 before going shopping, practicing social distancing), and at home (changing clothes before going  
29 indoors, showering, and physical separation, including staying in hotel rooms or Air B&Bs).  
30  
31  
32  
33  
34  
35  
36

37  
38 Social support was another significant coping resource reported by the participant  
39 observers. This included support provided by family members, some of whom were themselves  
40 healthcare providers, and support from colleagues at work such as assistance in donning PPE,  
41 acquiring PPE and adjusting schedules to cover for colleagues at risk for infection and illness. It  
42 also included support from the community, manifested in deliveries of food and public  
43 expressions of gratitude.  
44  
45  
46  
47  
48  
49  
50

51 A fourth important coping resource was the availability of mental health services. The  
52 healthcare system provided counseling services to providers and staff. These included drop-in  
53  
54  
55  
56  
57  
58  
59  
60



1  
2  
3 sessions for all hospital employees with mental health service providers and drop-in sessions  
4  
5 developed by individual units or departments within the system. Both types of sessions occurred  
6  
7 over Zoom. Although the services provided were acknowledged to be helpful by those providers  
8  
9 and staff who utilized them, there was also a sense that they were not widely used.  
10  
11

12 A fifth important resource was information. With experience and information provided  
13  
14 by the system and preliminary research by others, the level of uncertainty associated with the  
15  
16 pandemic, including risk of infection, duration of the pandemic, and best practices for treatment,  
17  
18 appeared to be diminishing, if only by degrees.  
19  
20

21 Finally, there were numerous reports of attempts at self-care. These included a focus on  
22  
23 healthy eating habits, adopting alternative forms of physical exercise, engaging in mindfulness  
24  
25 and reflexivity, and spending more time outdoors.  
26  
27

### 28 **Theme 3. Impact on patients**

29  
30 The third theme was the impact of the pandemic on the patients seen in the acute care setting.  
31  
32 This theme included four subthemes (Table 3): 1) patient access to care; 2) patient fears of  
33  
34 getting infected at the hospital; 3) changes in presenting problems; and 4) disparities in patient  
35  
36 risk for COVID-19 and healthcare access.  
37  
38

39  
40 **Table 3. Impacts of COVID-19 pandemic on patients**

| 41 Subtheme                 | 42 Level | 43 Illustrative quote                                                                                                                                                                                                                                                                                                                                                                                                                                                                                                                                                                                     |
|-----------------------------|----------|-----------------------------------------------------------------------------------------------------------------------------------------------------------------------------------------------------------------------------------------------------------------------------------------------------------------------------------------------------------------------------------------------------------------------------------------------------------------------------------------------------------------------------------------------------------------------------------------------------------|
| 44 <b>Access to care</b>    | 45 2,3,4 | 46 <i>Also, transitions for people seeking treatment have been difficult. Our detox center for alcohol detox treatment now requires negative COVID testing. Our outpatient based opioid treatment program partner now only utilizes phone appointments. Many community mental health programs are no longer accepting walk-ins. I'm hopeful this will change, but service access for patients with SUD [substance use disorder] is really difficult right now.</i> -debriefing interview                                                                                                                  |
| 49 <b>Fear of infection</b> | 50 2,3,4 | 51 <i>There's a lot of patients that are being fully recognized by the ED now and it's risky for them. They don't want to be there, I mean, they are there because they're having something unrelated to covid-19, chest pain for example. Where they want emergency evaluation and they need one. But they fully realize that as the minutes tick, they perceive just being in the ER is risky and so they are anxious about that. A lot of questions like, "do I really need to do that? Can I just go? When is this test going to be done? Can I get this as an outpatient?"</i> -debriefing interview |

|                            |       |                                                                                                                                                                                                                                                                                                                                                                                                                                                                                                                                                                                                                                                                                                                                                                                                                                                                                                                                                       |
|----------------------------|-------|-------------------------------------------------------------------------------------------------------------------------------------------------------------------------------------------------------------------------------------------------------------------------------------------------------------------------------------------------------------------------------------------------------------------------------------------------------------------------------------------------------------------------------------------------------------------------------------------------------------------------------------------------------------------------------------------------------------------------------------------------------------------------------------------------------------------------------------------------------------------------------------------------------------------------------------------------------|
| <b>Presenting problems</b> | 2,3,4 | <i>We have not been as busy from a trauma perspective, although the last couple weeks have been picking up as people, I think, are getting a little more antsy with the social distancing and things. We've certainly seen a lot, like a lot more, or it seems like more at least of the self-harm and non-accidental type of traumas, which has been challenge in and of itself. And then on the general surgery side it seems like people with like normal problems like appendicitis and you know infected gallbladders are coming in later than the otherwise would I think out of concern for, you know, being in the hospital if they don't need to be which is a valid concern. -debriefing interview</i>                                                                                                                                                                                                                                      |
| <b>Risk disparities</b>    | 1,2,4 | <i>One thing that I have noticed in taking care of patients with COVID-19 how many people with COVID-19 have a lot of vulnerabilities in the social determinants of health that kind of layer on that person's ability to manage their assets. And so, the number of patients non-English-speaking is 75% of the patients that I have seen with COVID-19 English-speaking. Either service sector uninsured or underinsured with little access to ability to physically distance at home or multi-generational living where the mom works but she has a baby and Grandma takes care of the baby during the day and how do you take care of a baby and older parent? How do you reconcile that in a two-bedroom condo 1 bathroom when someone take public transportation and so I just been struck with the fact that this is going to take a huge toll on people of color or the Spanish-speaking people who are immigrants? -debriefing interview</i> |

### Patient access to care

One of the biggest challenges faced by patients has been in getting access to care. The ED saw more patients who had appointments for nonessential care in other departments cancelled due to office closures. POs also noted changes in patient-provider interactions resulting from social distancing and PPE use and the suspension of nonessential procedures.

### Fear of getting infected at the hospital

Patients expressed concerns about becoming infected while getting treated at the hospital and infecting family members in turn. Other patients have delayed getting medications refilled at the hospital to reduce the risk of infection.

### Changes in presenting problems

Some of the POs also noted more patients with mental and behavioral health issues that have been exacerbated by the threat of infection, collapse of the economy, and the challenges in obtaining medication and nonessential clinical services. Delays in seeking or receiving services due to the pandemic was also perceived to result in patients presenting with more severe symptoms or clinical conditions when they are finally seen.



### Disparities in risk for infection

Finally, the pandemic has illustrated the health disparities that have long been associated with the risk of illness and the accessibility of health care. Providers reported several instances of patients from disadvantaged backgrounds, including older adults, homeless, non-English-speaking immigrants, the poor, and the disabled, who are overrepresented in acute care safety-net settings under normal circumstances, but who also test positive for the novel coronavirus or are a COVID-19 PUI (person under investigation) and who reside in households where the risk of transmission of the virus is high.

### **Theme 4. Overall impact on quality of care**

Despite concerns expressed by staff over the potential effects of delays in testing for COVID-19 and the challenges associated with social distancing and PPE use, the overall quality of care delivered to patients does not appear to have been significantly affected. This is attributed by providers and staff to four factors (Table 4). First, the April 2020 surge was less than anticipated. After the initial outbreak of cases, the pandemic had more of an impact on assessment of cases that were coming in than on the number of patients actually treated. Workload did increase in many instances due to the imposition of new procedures related to PPE, distancing and coverage for personnel at risk for infection, but there was no sense that people were working longer hours, for instance. Second, the system was viewed by its employees as having been prepared for the pandemic from an operations perspective. With the initial outbreak at an assisted-care nursing facility in a suburban community, a regional incidence response plan and hospital guidelines for patient screening, social distancing and PPE use were implemented. Some of those guidelines changed over time as the anticipated surge failed to materialize and as experience dictated necessary improvements to reduce delays and maintain standards for service delivery. Third,

while some supplies such as N95 masks were in short supply and procedures for screening ED patients for COVID-19 were based on the perceived need to limit provider use of PPE to patients who tested positive or were at significant risk for infection, supplies viewed as essential for responding to the pandemic, including PPE and ventilators, were available and adequate to the current demand. Finally, despite the negative impacts on providers listed earlier, morale among hospital staff was high. Providers and staff appeared to be managing with the resources available to them that enable them to provide the best care possible, seek emotional support, engage in self-care, and exercise preventive measures designed to reduce the risk of infection.

**Table 4. Overall impacts of COVID-19 pandemic on service delivery**

| Subtheme                         | Level | Illustrative quote                                                                                                                                                                                                                                                                                                                                                                                                                                                                                                                                                                                                                                                                                                                                                                             |
|----------------------------------|-------|------------------------------------------------------------------------------------------------------------------------------------------------------------------------------------------------------------------------------------------------------------------------------------------------------------------------------------------------------------------------------------------------------------------------------------------------------------------------------------------------------------------------------------------------------------------------------------------------------------------------------------------------------------------------------------------------------------------------------------------------------------------------------------------------|
| <b>Fewer cases than expected</b> | 1,2   | <i>Yeah, so we, you know we did prep for a much larger surge based on the initial predictions for Washington than we ended up having. I think as a result of pretty aggressive social distancing and stay at home orders, which if you look at them, the series of prediction sort of the surge got less and less. -debriefing interview</i>                                                                                                                                                                                                                                                                                                                                                                                                                                                   |
| <b>System was prepared</b>       | 2,3   | <i>At Harborview though, you know, we received patients from that event. It was not, it did not overwhelm us. We then, you know that sort of triggered the overall, sort of regional, you know, incident response structure that is in place today. And as we started to prepare for the surge, we were able to very easily keep up with the inflow of patients. And so, at this point the workload...you know people are still very much able to get their time off. The workload is, I mean there's work to be done but it's not overwhelming. And so, I think from that standpoint, we haven't seen the fatigue, the long hours, the multiple days, that you might see where, you know, kind of the picture that's being described in the, in New York right now. -debriefing interview</i> |
| <b>Supplies were adequate</b>    | 2,3   | <i>So, so the provider saw the 20 patients on the unit. And got ample goggles, masks and gloves on the unit from the nursing staff. -jotting</i>                                                                                                                                                                                                                                                                                                                                                                                                                                                                                                                                                                                                                                               |
| <b>High staff morale</b>         | 3,4   | <i>So, it's definitely, it's definitely something on people's minds. But does it affect the day-to-day performance? I have not seen that. People are absolutely willing to step in and do the work. -debriefing interview</i>                                                                                                                                                                                                                                                                                                                                                                                                                                                                                                                                                                  |

## DISCUSSION

This study identified four different kinds of impacts of the COVID-19 pandemic on delivery of clinical services in a Level 1 trauma center during a surge of cases that occurred the month of April 2020: procedural, provider, patient, and overall. Each impact highlighted two or more levels of a socio-ecological model of services delivery: the outermost or environmental service setting framed by the novel coronavirus and its global spread, the external or macro service

1  
2  
3 setting framed by the supply and demand for care; the internal or mezzo service setting framed  
4  
5 by guidelines and policies put in place to ensure the safety and health of both patients and  
6  
7 providers, and the micro service setting framed by individual patient and provider behavior.  
8  
9  
10 Despite significant changes in procedures that included COVID-19 screening of all admitted  
11  
12 patients, social distancing and use of PPE, as well as changes in patient characteristics and  
13  
14 provider behavior, the overall impact of the pandemic on the quality of service delivery, as  
15  
16 described by front-line providers, appears to have been minimal. This is attributed to having a  
17  
18 smaller surge than expected, a quick response by the healthcare system to anticipated demands  
19  
20 for service delivery and protection of patients and providers, available supplies, and high  
21  
22 provider morale.  
23  
24  
25

26 Consistent with studies of earlier infectious disease pandemics,<sup>13-23</sup> and recent reports  
27  
28 published during the early phases of the COVID-19 pandemic in China,<sup>40</sup> Italy,<sup>41</sup> and the U.S.,<sup>42</sup>  
29  
30 reports of anxiety and fear of infection among trauma center providers and staff were  
31  
32 widespread. Providers also reported instances of stress related to other aspects of the pandemic,  
33  
34 including financial stability, impacts on loved ones, and isolation and confinement, which have  
35  
36 also been found in studies of other pandemics.<sup>15,16</sup> However, there were also reports of depressed  
37  
38 mood related to separation of family members from sick and dying patients and not being able to  
39  
40 deliver necessary care, the experience of ethical tensions related to the perceived risk of coming  
41  
42 to work sick and infecting others, engaging in other forms of risk behavior like violating stay at  
43  
44 home orders, and the concern that some forms of care were currently being or likely to be  
45  
46 rationed; guilt over having the opportunity to interact with colleagues when others must stay at  
47  
48 home; and interactions with colleagues that highlight undercurrents of social tension related to  
49  
50 professional disciplinary differences or failure to adhere to guidelines regarding distancing.  
51  
52  
53  
54  
55  
56  
57  
58  
59  
60

1  
2  
3 These impacts have not been reported in previous studies of the psychological impacts of other  
4  
5 infectious disease pandemics on healthcare providers.<sup>13-22</sup>  
6

7  
8 It is also quite likely that levels of anxiety and fear of infection was much less than has  
9  
10 been reported in other healthcare systems because the surge was much less than anticipated and  
11  
12 because there were no reports of providers and staff becoming severely ill or dying despite a  
13  
14 positive test.<sup>31</sup> Earlier studies of ED personnel and infectious disease pandemics have also noted  
15  
16 lower than expected prevalence of mental health problems, which have been attributed to the  
17  
18 greater resilience of individuals who choose this type of work.<sup>21</sup> We also identified several  
19  
20 strategies used by providers and staff to cope with the pandemic and its organizational and  
21  
22 individual impacts. Adaptive coping has been associated with reduced risk of psychiatric  
23  
24 morbidity has been reported in studies of other respiratory disease outbreaks.<sup>12,16,17,21</sup>  
25  
26  
27

28  
29 The study occurred in a healthcare setting that was one of the first to be impacted by the  
30  
31 pandemic. However, the impacts associated with the pandemic in this setting have not been as  
32  
33 severe as has been the case elsewhere, especially in New York City, limiting the generalizability  
34  
35 of our findings. Furthermore, our findings are limited by the relative short duration of  
36  
37 participation observation (1-4 weeks) in a single setting (trauma/emergency medicine) and the  
38  
39 constraints of engaging in participant observation while also performing intensive clinical tasks  
40  
41 under conditions of social distancing and use of PPE. In contrast to studies of previous infectious  
42  
43 disease pandemics,<sup>13,14,17,18,20,21</sup> no standardized measures were used to assess mental health  
44  
45 status. Our assessment of impacts on the quality of service delivery was based entirely on self-  
46  
47 report or observational data and not on objective measures of quality of care.  
48  
49  
50

51  
52 Despite these limitations, this study was one of the first to be conducted in the United  
53  
54 States that examined the impact of a still-unfolding infectious disease pandemic in a health care  
55  
56  
57  
58  
59

1  
2  
3 setting representing the first point of entry for COVID-19-positive patients. Although previous  
4  
5 studies of healthcare responses to infectious disease pandemics have also noted changes in  
6  
7 procedures,<sup>13,15,18</sup> this is the first study to our knowledge to examine the impact of these changes  
8  
9 on service delivery. The study utilized a standardized protocol for conducting ethnographic  
10  
11 research that enabled us to collect and analyze data in a short period of time with minimal impact  
12  
13 on patients or providers under conditions of social distancing and PPE use. The RAPICE  
14  
15 approach also has potential for assessing these impacts longitudinally and providing formative  
16  
17 evaluations of policies and procedures designed to mitigate them.  
18  
19  
20

## 21 CONCLUSIONS

22  
23 Although this study was conducted within one setting in one healthcare system in one  
24  
25 community, the findings offer some important lessons for healthcare systems that have yet to be  
26  
27 impacted, as well as systems that have been more severely impacted. Each of the levels in our  
28  
29 socio-ecological model were found to impact the delivery of services to patients in the time of  
30  
31 COVID-19, and variations at each of these levels account for variations in that delivery of care  
32  
33 globally.  
34  
35  
36

37 **Contributors:** LAP and DZ conceived and designed the study and the analysis plan. LW DN AE  
38  
39 MT and DZ collected the data and participated in data analysis, along with LAP. KM provided  
40  
41 study project management. All authors contributed intellectual content during the drafting and  
42  
43 revision of the work and approved the final version.  
44  
45  
46

47 **Funding:** This study was supported in part by the Patient-Centered Outcomes Research Institute  
48  
49 (PCORI) Award [IHS-2017C1-6151]. This research was also supported within the National  
50  
51 Institutes of Health (NIH) Health Care Systems Research Collaboratory by cooperative  
52  
53 agreement 4UH3MH106338-02] from the National Institute of Mental Health. Support was also  
54  
55  
56  
57  
58  
59

1  
2  
3 provided by the NIH Common Fund through cooperative agreement [U24AT009676] from the  
4 Office of Strategic Coordination within the Office of the NIH Director. The content is solely the  
5 responsibility of the authors and does not necessarily represent the official views of PCORI, its  
6 Board of Governors or Methodology Committee, or the NIH.  
7  
8  
9  
10  
11

12 **Competing Interests:** All authors have completed the ICMJE uniform disclosure form at  
13 [www.icmje.org/coi\\_disclosure.pdf](http://www.icmje.org/coi_disclosure.pdf) and declare: all authors had financial support from the  
14 Patient-Centered Outcomes Research Institute and National Institutes of Health for the submitted  
15 work; no financial relationships with any organisations that may have an interest in the submitted  
16 work in the previous three years; no other relationships or activities that could appear to have  
17 influenced the submitted work.  
18  
19  
20  
21  
22  
23  
24  
25

26 **Ethical Approval:** All study procedures were approved by the IRBs of the University of  
27 Washington and University of Southern California (UP-20-00298) prior to the initiation of the  
28 investigation.  
29  
30  
31  
32

33 **Data Sharing:** Data used in this study is available from the corresponding author upon  
34 reasonable request. All personal identifiers found in the data will be removed prior to sharing.  
35  
36

37 **Transparency Statement:** The lead author (the manuscript's guarantor) affirms that the  
38 manuscript is an honest, accurate, and transparent account of the study being reported; that no  
39 important aspects of the study have been omitted; and that any discrepancies from the study as  
40 planned (and, if relevant, registered) have been explained.  
41  
42  
43  
44  
45  
46  
47  
48  
49  
50

## 51 REFERENCES

52  
53  
54  
55  
56  
57  
58  
59  
60

- 1  
2  
3 1. Cucinotta D, Vanelli M. WHO declares COVID-19 a pandemic. *Acta Biomed* 2020;91:157-  
4  
5 60.  
6
- 7  
8 2. Taubenberger JK, Kash JC, Morens DM. The 1918 influenza pandemic: 100 years of  
9  
10 questions answered and unanswered. *Sci Transl Med* 2019;11(502):eaau5485. doi:  
11  
12 10.1126/scitranslmed.aau5485.  
13
- 14  
15 3. The Johns Hopkins University and School of Medicine. Coronavirus Center. COVID-19  
16  
17 dashboard by the Center for Systems Science and Engineering (CSSE) at Johns Hopkins  
18  
19 University. <https://coronavirus.jhu.edu/map.html>. (Accessed May 29, 2020).  
20
- 21  
22 4. Bureau of Labor Statistics. Unemployment rate rises to record high 14.7 percent in April  
23  
24 2020. [https://www.bls.gov/opub/ted/2020/unemployment-rate-rises-to-record-high-14-point-](https://www.bls.gov/opub/ted/2020/unemployment-rate-rises-to-record-high-14-point-7-percent-in-april-2020.htm?view_full)  
25  
26 [7-percent-in-april-2020.htm?view\\_full](https://www.bls.gov/opub/ted/2020/unemployment-rate-rises-to-record-high-14-point-7-percent-in-april-2020.htm?view_full) (Accessed May 15, 2020).  
27
- 28  
29 5. California Coronavirus (COVID-19) Response. Stay home except for essential needs.  
30  
31 <https://covid19.ca.gov/stay-home-except-for-essential-needs/#top>. (Accessed May 4, 2020).  
32
- 33  
34 6. Morganstein JC, Fullerton CS, Ursano RJ, Donato D, Holloway HC. Pandemics: health care  
35  
36 emergencies. In: Raphael B, Fullerton CS, Weisaeth L, Ursano RJ, eds. Textbook of disaster  
37  
38 psychiatry, 2nd ed. New York: Cambridge University Press, 2017:270-84.  
39
- 40  
41 7. Rubinson L, Mutter R, Viboud C, et al. Impact of the fall 2009 influenza A(H1N1)pdm09  
42  
43 pandemic on US hospitals. *Med Care* 2013;51:259-65.  
44
- 45  
46 8. Schanzer DL, Schwartz B. Impact of seasonal and pandemic influence on emergency  
47  
48 department visits, 2003-2010, Ontario, Canada. *Acad Emerg Med* 2013;20(4):388-97.  
49
- 50  
51 9. Panagioti M, Geraghty K, Johnson J, et al. Association between physician burnout and  
52  
53 patient safety, professionalism, and patient satisfaction: a systematic review and meta-  
54  
55 analysis. *JAMA Intern Med* 2018;178(10):1317-30.  
56  
57  
58  
59

10. Tawfik DS, Scheid A, Profit J, et al. Evidence relating health care provider burnout and quality of care: a systematic review and meta-analysis. *Ann Intern Med* 2019;171(8):555-67.
11. Benedek DM, Fullerton C, Ursano RJ. First responders: mental health consequences of natural and human made disasters for public health and public safety workers. *Annu Rev Public Health* 2016;28:55-68.
12. Naushad VA, Bierens JJ, Nishan KP, et al. A systematic review of the impact of disaster on the mental health of medical responders. *Prehosp Disaster Med* 2019;34(6):632-43.
13. Nickell LA, Crighton EJ, Tracy C, et al. Psychological effects of SARS on hospital staff: survey of a large tertiary care institution. *CMAJ* 2004;170(5):793-8.
14. Chua SE, Cheung V, Cheung C, et al. Psychological effects of SARS outbreak in Hong Kong on high risk health care workers. *Can J Psychiatry* 2004;49(6):391-3.
15. Bai Y, Lin CC, Lin CY, Chen JY, Chue CM, Chou P. Survey of stress reactions among health care workers involved with the SARS outbreak. *Psychiatr Serv* 2004;55(9):1055-7.
16. Wong, TW, Yau, JKY, Chan, CLW, et al. Psychological impact of severe acute respiratory syndrome outbreak on health care workers in an emergency department and how they cope. *Eur J Emerg Med* 2005;12(1):13-8.
17. Lin CY, Peng YC, Wu YH, Chang J, Chan CH, Yang DY. The psychological effect of severe acute respiratory syndrome on emergency staff. *Emerg Med J* 2007;24(1):12-7.
18. Goulia P, Mantas C, Dimitroula D, Mantis D, Hyphantis T. General hospital staff worries, perceived sufficiency of information and associated psychological distress during the A/H1N1 influenza pandemic. *BMC Infect Dis* 2010;10:322.



- 1  
2  
3 19. Mohammaed AG, Turki A, Abdulla A. et al. Perception and attitude of emergency room  
4 resident physicians toward the Middle East Respiratory Syndrome outbreak. *Emerg Med Int*  
5 2017;2017:6978256. doi: 10.1155/2017/6978256.  
6  
7  
8  
9  
10 20. Lancee WJ, Maunder RG, Goldbloom DS. Prevalence of psychiatric disorders among  
11 Toronto hospital workers one to two years after SARS outbreak. *Psychiatr*  
12 *Serv* 2008;59(1):91–5.  
13  
14  
15  
16  
17 21. Maunder RG, Lancee WJ, Balderson KE, et al. Long term psychological and occupational  
18 effects of providing hospital health care during SARS outbreak. *Emerg Infect*  
19 *Dis* 2006;12(12):1924–32.  
20  
21  
22  
23  
24 22. Lai J, Ma S, Wang Y, et al., Factors associated with mental health outcomes among health  
25 care workers exposed to coronavirus disease 2019. *JAMA Network Open* 2020;3(3):e203976.  
26  
27  
28  
29 23. Wilder-Smith A, Chiew CJ, Lee VJ. Can we contain the COVID-19 outbreak with the same  
30 measures as for SARS? *Lancet Infect Dis* 2020;20(5):e102-7. doi: 10.1016/S1473-  
31 3099(20)30129-8.  
32  
33  
34  
35 24. Matrajt L, Leung T. Evaluating the effectiveness of social distancing interventions to delay  
36 or flatten the epidemic curve of coronavirus disease. *Emerg Infect Dis* 2020;26(8) published  
37 online April 28. doi: 10.3201/eid2608.201093.  
38  
39  
40  
41  
42 25. Mahler J. Epicenter: inside the underfunded, overwhelmed public hospitals that are trying to  
43 save New York. *The New York Times Magazine*, April 19, 2020:24-51.  
44  
45  
46  
47 26. Kim CS, Lynch JB, Cohen S et al. One academic health system’s early (and ongoing)  
48 experience responding to COVID-19: recommendations from the initial epicenter of the  
49 pandemic in the United States. *Acad Med* 2020; published online April 9.  
50  
51  
52  
53 [10.1097/ACM.00000000000003410](https://doi.org/10.1097/ACM.00000000000003410)  
54  
55  
56  
57  
58  
59  
60

- 1  
2  
3 27. McLeroy KR, Bibeau D, Steckler A, et al. An ecological perspective on health promotion  
4 programs. *Health Educ Q*. 1988;15(4):351–77.  
5  
6  
7  
8 28. Kumar S, Quinn SC, Kim KH, et al. The social ecological model as a framework for  
9 determinants of 2009 H1N1influenzavaccine uptake in the US. *Health Educ Behav*  
10 2012;39(2):229-43. doi:10.1177/1090198111415105  
11  
12  
13  
14 29. Moore M, Cristofalo M, Dotolo D, et al. When high pressure, system constraints, and a social  
15 justice mission collide: a socio-structural analysis of emergency department social work  
16 services. *Soc Sci Med* 2017;178:104-14.  
17  
18  
19  
20  
21 30. Scheuer H, Engstrom A, Thomas P, et al. A comparative effectiveness trial of an  
22 information technology enhanced peer-integrated collaborative care intervention versus  
23 enhanced usual care for US trauma care systems: clinical study protocol. *Contemp Clin*  
24 *Trials* 2020;91(105970). <https://doi.org/10.1016/j.cct.2020.105970>  
25  
26  
27  
28  
29  
30 31. Palinkas LA, Zatzick D. Rapid assessment procedure informed clinical ethnography  
31 (RAPICE) in Pragmatic clinical trials of mental health services implementation: methods and  
32 applied case study. *Admin Policy Ment Health* 2019;46:255-70.  
33  
34  
35  
36  
37 32. Moloney K, Scheuer H, Engstrom A, et al. Experiences and insights from the early US  
38 COVID-19 epicenter: a rapid assessment procedure informed clinical ethnography case  
39 series. *Psychiatry* 2020, in press.  
40  
41  
42  
43  
44 33. Palinkas LA, Prussing E, Reznik VM, Landsverk J. The San Diego East County school  
45 shootings: a qualitative study of community-level post-traumatic stress. *Prehosp Disaster*  
46 *Med* 2004;19(1):113–21.  
47  
48  
49  
50  
51  
52  
53  
54  
55  
56  
57  
58  
59  
60

- 1  
2  
3 34. Zatzick D, Coq N, Frederic J, et al. Psychosocial support training for HIV health care  
4 providers in response to the Haitian earthquake. Consortium of Universities for Global  
5 Health Annual Meeting, University of Washington, Seattle, WA., 2010.  
6  
7  
8  
9
- 10 35. HCPro. Case study: Harborview Medical Center's automated sepsis alert system. Nurse  
11 Leader Insider Sept 6, 2018. [https://www.hcpro.com/NRS-331768-868/Case-Study-](https://www.hcpro.com/NRS-331768-868/Case-Study-Harborview-Medical-Centers-Automated-Sepsis-Alert-System.html)  
12 [Harborview-Medical-Centers-Automated-Sepsis-Alert-System.html](https://www.hcpro.com/NRS-331768-868/Case-Study-Harborview-Medical-Centers-Automated-Sepsis-Alert-System.html). (Accessed June 9,  
13 2020).  
14  
15  
16  
17  
18
- 19 36. Padgett DK. Qualitative methods in social work research. 3<sup>rd</sup> ed. Los Angeles, CA: Sage;  
20 2017.  
21  
22  
23
- 24 37. Miller WL, Crabtree BF. Primary care research: a multimethod typology and qualitative road  
25 map. In: Crabtree BF, Miller WL, eds. Doing qualitative research. Newbury Park, CA: Sage;  
26 1992:3-30.  
27  
28  
29
- 30 38. Saldana J. The coding manual for qualitative researchers, 3rd ed. Los Angeles: Sage; 2016.  
31  
32
- 33 39. Centers for Disease Control. Social distancing. National Center for Immunization and  
34 Respiratory Diseases (NCIRD), Division of Viral Diseases.  
35  
36 [https://www.cdc.gov/coronavirus/2019-ncov/prevent-getting-sick/social-](https://www.cdc.gov/coronavirus/2019-ncov/prevent-getting-sick/social-distancing.html#:~:text=Social%20distancing%2C%20also%20called%20%E2%80%9Cphysical,both%20indoor%20and%20outdoor%20spaces)  
37 [distancing.html#:~:text=Social%20distancing%2C%20also%20called%20%E2%80%9Cphys](https://www.cdc.gov/coronavirus/2019-ncov/prevent-getting-sick/social-distancing.html#:~:text=Social%20distancing%2C%20also%20called%20%E2%80%9Cphysical,both%20indoor%20and%20outdoor%20spaces)  
38 [ical,both%20indoor%20and%20outdoor%20spaces](https://www.cdc.gov/coronavirus/2019-ncov/prevent-getting-sick/social-distancing.html#:~:text=Social%20distancing%2C%20also%20called%20%E2%80%9Cphysical,both%20indoor%20and%20outdoor%20spaces). (Accessed August 26, 2020).  
39  
40  
41  
42  
43  
44
- 45 40. Chen Q, Liang M, Li Y, et al. Mental health care for medical staff in China during the  
46 COVID-19 outbreak. *Lancet Psychiatry* 2020 Apr;7(4):e15-e16. doi: 10.1016/S2215-  
47 0366(20)30078-X.  
48  
49  
50  
51  
52  
53  
54  
55  
56  
57  
58  
59  
60

- 1  
2  
3 41. Barello S, Palamenghi L, Graffigna G. Burnout and somatic symptoms among frontline  
4 healthcare professionals at the peak of the Italian COVID-19 pandemic. *Psychiatry Res*  
5 2020;290:113129. <https://doi.org/10.1016/j.psychres.2020.113129>  
6  
7  
8  
9  
10 42. Shanafelt T, Ripp J, Trockel M. Understanding and addressing sources of anxiety among  
11 health care professionals during the COVID-19 pandemic. *JAMA* 2020; published online  
12 April 7. doi:10.1001/jama.2020.5893.  
13  
14  
15  
16  
17  
18  
19  
20  
21  
22  
23  
24  
25  
26  
27  
28  
29  
30  
31  
32  
33  
34  
35  
36  
37  
38  
39  
40  
41  
42  
43  
44  
45  
46  
47  
48  
49  
50  
51  
52  
53  
54  
55  
56  
57  
58  
59  
60

1  
2  
3  
4  
5  
6  
7  
8  
9  
10  
11  
12  
13  
14  
15  
16  
17  
18  
19  
20  
21  
22  
23  
24  
25  
26  
27  
28  
29  
30  
31  
32  
33  
34  
35  
36  
37  
38  
39  
40  
41  
42  
43  
44  
45  
46  
47  
48  
49  
50  
51  
52  
53  
54  
55  
56  
57  
58  
59  
60

Figure 1. Conceptual Framework of COVID-19 Pandemic and Its Impact on Supply and Demand for Mental and Behavioral Health Services

For peer review only



Review only

1  
2  
3  
4  
5  
6  
7  
8  
9  
10  
11  
12  
13  
14  
15  
16  
17  
18  
19  
20  
21  
22  
23  
24  
25  
26  
27  
28  
29  
30  
31  
32  
33  
34  
35  
36  
37  
38  
39  
40  
41  
42  
43  
44  
45  
46  
47  
48  
49  
50  
51  
52  
53  
54  
55  
56  
57  
58  
59  
60

## Supplementary Document 1

### Interview Guide for Conducting COVID-19 Debriefs with TSOS Study Team Members

Debriefs will be used to elaborate on information provided by study team members acting as Participant Observers (POs) in the form of jottings and field notes.

1. Can you elaborate on any events that you observed during your shifts in the Trauma Center (TC) that illustrate the impacts on the pandemic on the performance and well-being of TC providers and staff?
2. Can you elaborate on any events that illustrate the impacts of the pandemic on execution of TSOS study tasks (e.g., patient recruitment, screening and referral, data collection)?
3. Have you heard from other TC providers and staff of physical and emotional impacts of additional workload?
4. Can you elaborate on any observed impacts of the pandemic on provider interactions with patients, family members and other providers?
5. Have you observed and/or heard about instances of strategies used by TC providers to cope with the increased personal and professional demands imposed by the pandemic?
6. Have the demands for health care delivery in the TC produced by the pandemic generated any ethical tensions among providers and staff?
7. Do you have any suggestions for services required to address psychosocial needs of providers resulting from increased demands associated with the pandemic?
8. Have you heard any suggestions for services required to address psychosocial needs of providers resulting from increased demands associated with the pandemic from your colleagues?

## Standards for Reporting Qualitative Research (SRQR)\*

<http://www.equator-network.org/reporting-guidelines/srqr/>

Page/line no(s).

### Title and abstract

|                                                                                                                                                                                                                                                              |     |
|--------------------------------------------------------------------------------------------------------------------------------------------------------------------------------------------------------------------------------------------------------------|-----|
| <p><b>Title</b> - Concise description of the nature and topic of the study Identifying the study as qualitative or indicating the approach (e.g., ethnography, grounded theory) or data collection methods (e.g., interview, focus group) is recommended</p> | 1   |
| <p><b>Abstract</b> - Summary of key elements of the study using the abstract format of the intended publication; typically includes background, purpose, methods, results, and conclusions</p>                                                               | 2-3 |

### Introduction

|                                                                                                                                                                     |     |
|---------------------------------------------------------------------------------------------------------------------------------------------------------------------|-----|
| <p><b>Problem formulation</b> - Description and significance of the problem/phenomenon studied; review of relevant theory and empirical work; problem statement</p> | 5-7 |
| <p><b>Purpose or research question</b> - Purpose of the study and specific objectives or questions</p>                                                              | 7   |

### Methods

|                                                                                                                                                                                                                                                                                                                                                                                                             |      |
|-------------------------------------------------------------------------------------------------------------------------------------------------------------------------------------------------------------------------------------------------------------------------------------------------------------------------------------------------------------------------------------------------------------|------|
| <p><b>Qualitative approach and research paradigm</b> - Qualitative approach (e.g., ethnography, grounded theory, case study, phenomenology, narrative research) and guiding theory if appropriate; identifying the research paradigm (e.g., postpositivist, constructivist/ interpretivist) is also recommended; rationale**</p>                                                                            | 7-8  |
| <p><b>Researcher characteristics and reflexivity</b> - Researchers' characteristics that may influence the research, including personal attributes, qualifications/experience, relationship with participants, assumptions, and/or presuppositions; potential or actual interaction between researchers' characteristics and the research questions, approach, methods, results, and/or transferability</p> | 9    |
| <p><b>Context</b> - Setting/site and salient contextual factors; rationale**</p>                                                                                                                                                                                                                                                                                                                            | 7-8  |
| <p><b>Sampling strategy</b> - How and why research participants, documents, or events were selected; criteria for deciding when no further sampling was necessary (e.g., sampling saturation); rationale**</p>                                                                                                                                                                                              | 8-9  |
| <p><b>Ethical issues pertaining to human subjects</b> - Documentation of approval by an appropriate ethics review board and participant consent, or explanation for lack thereof; other confidentiality and data security issues</p>                                                                                                                                                                        | 9-10 |
| <p><b>Data collection methods</b> - Types of data collected; details of data collection procedures including (as appropriate) start and stop dates of data collection and analysis, iterative process, triangulation of sources/methods, and modification of procedures in response to evolving study findings; rationale**</p>                                                                             | 9-10 |



|    |                                                                                         |       |
|----|-----------------------------------------------------------------------------------------|-------|
| 1  |                                                                                         |       |
| 2  |                                                                                         |       |
| 3  | <b>Data collection instruments and technologies</b> - Description of instruments (e.g., | 10    |
| 4  | interview guides, questionnaires) and devices (e.g., audio recorders) used for data     |       |
| 5  | collection; if/how the instrument(s) changed over the course of the study               |       |
| 6  |                                                                                         |       |
| 7  | <b>Units of study</b> - Number and relevant characteristics of participants, documents, | 9     |
| 8  | or events included in the study; level of participation (could be reported in results)  |       |
| 9  |                                                                                         |       |
| 10 | <b>Data processing</b> - Methods for processing data prior to and during analysis,      | 10-11 |
| 11 | including transcription, data entry, data management and security, verification of      |       |
| 12 | data integrity, data coding, and anonymization/de-identification of excerpts            |       |
| 13 |                                                                                         |       |
| 14 | <b>Data analysis</b> - Process by which inferences, themes, etc., were identified and   | 10-11 |
| 15 | developed, including the researchers involved in data analysis; usually references a    |       |
| 16 | specific paradigm or approach; rationale**                                              |       |
| 17 |                                                                                         |       |
| 18 | <b>Techniques to enhance trustworthiness</b> - Techniques to enhance trustworthiness    | 10-11 |
| 19 | and credibility of data analysis (e.g., member checking, audit trail, triangulation);   |       |
| 20 | rationale**                                                                             |       |

### Results/findings

|    |                                                                                             |            |
|----|---------------------------------------------------------------------------------------------|------------|
| 21 |                                                                                             |            |
| 22 |                                                                                             |            |
| 23 | <b>Synthesis and interpretation</b> - Main findings (e.g., interpretations, inferences, and | 11-23      |
| 24 | themes); might include development of a theory or model, or integration with                |            |
| 25 | prior research or theory                                                                    |            |
| 26 |                                                                                             |            |
| 27 | <b>Links to empirical data</b> - Evidence (e.g., quotes, field notes, text excerpts,        | Tables 1-4 |
| 28 | photographs) to substantiate analytic findings                                              |            |
| 29 |                                                                                             |            |

### Discussion

|    |                                                                                           |       |
|----|-------------------------------------------------------------------------------------------|-------|
| 30 |                                                                                           |       |
| 31 |                                                                                           |       |
| 32 | <b>Integration with prior work, implications, transferability, and contribution(s) to</b> | 23-26 |
| 33 | <b>the field</b> - Short summary of main findings; explanation of how findings and        |       |
| 34 | conclusions connect to, support, elaborate on, or challenge conclusions of earlier        |       |
| 35 | scholarship; discussion of scope of application/generalizability; identification of       |       |
| 36 | unique contribution(s) to scholarship in a discipline or field                            |       |
| 37 |                                                                                           |       |
| 38 | <b>Limitations</b> - Trustworthiness and limitations of findings                          | 25-26 |
| 39 |                                                                                           |       |

### Other

|    |                                                                                            |       |
|----|--------------------------------------------------------------------------------------------|-------|
| 40 |                                                                                            |       |
| 41 |                                                                                            |       |
| 42 | <b>Conflicts of interest</b> - Potential sources of influence or perceived influence on    | 26    |
| 43 | study conduct and conclusions; how these were managed                                      |       |
| 44 |                                                                                            |       |
| 45 | <b>Funding</b> - Sources of funding and other support; role of funders in data collection, | 26-27 |
| 46 | interpretation, and reporting                                                              |       |
| 47 |                                                                                            |       |

\*The authors created the SRQR by searching the literature to identify guidelines, reporting standards, and critical appraisal criteria for qualitative research; reviewing the reference lists of retrieved sources; and contacting experts to gain feedback. The SRQR aims to improve the transparency of all aspects of qualitative research by providing clear standards for reporting qualitative research.

1  
2  
3  
4  
5  
6  
7  
8  
9  
10  
11  
12  
13  
14  
15  
16  
17  
18  
19  
20  
21  
22  
23  
24  
25  
26  
27  
28  
29  
30  
31  
32  
33  
34  
35  
36  
37  
38  
39  
40  
41  
42  
43  
44  
45  
46  
47  
48  
49  
50  
51  
52  
53  
54  
55  
56  
57  
58  
59  
60

\*\*The rationale should briefly discuss the justification for choosing that theory, approach, method, or technique rather than other options available, the assumptions and limitations implicit in those choices, and how those choices influence study conclusions and transferability. As appropriate, the rationale for several items might be discussed together.

**Reference:**

O'Brien BC, Harris IB, Beckman TJ, Reed DA, Cook DA. **Standards for reporting qualitative research: a synthesis of recommendations.** *Academic Medicine*, Vol. 89, No. 9 / Sept 2014  
DOI: 10.1097/ACM.0000000000000388

For peer review only
